# Supplementary material for: Patients’ experiences of acupuncture and counselling for depression and comorbid pain: a qualitative study nested within a randomised controlled trial
Source: PubMed Central journal article supplement (PMC4054660; doi:10.1136/bmjopen-2014-005144), 2014-06-05
Supplement: bmjopen-2014-005144.draft_revisions.pdf [file bmjopen-2014-005144.draft_revisions.pdf]

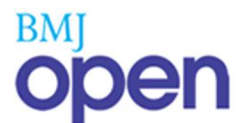

**Patient's experiences of acupuncture and counselling for depression and comorbid pain: a qualitative study nested within a randomised controlled trial.**

|                                 |                                                                                                                                                                 |
|---------------------------------|-----------------------------------------------------------------------------------------------------------------------------------------------------------------|
| Journal:                        | <i>BMJ Open</i>                                                                                                                                                 |
| Manuscript ID:                  | bmjopen-2014-005144                                                                                                                                             |
| Article Type:                   | Research                                                                                                                                                        |
| Date Submitted by the Author:   | 27-Feb-2014                                                                                                                                                     |
| Complete List of Authors:       | Hopton, Ann; University of York, Health Sciences<br>MacPherson, Hugh; University of York, Health Sciences<br>Eldred, Janet; University of York, Health Sciences |
| <b>Primary Subject Heading</b>: | Complementary medicine                                                                                                                                          |
| Secondary Subject Heading:      | Qualitative research, Patient-centred medicine, Mental health                                                                                                   |
| Keywords:                       | Depression, Pain management < ANAESTHETICS, PRIMARY CARE                                                                                                        |
|                                 |                                                                                                                                                                 |

SCHOLARONE™  
Manuscripts

1  
2  
3  
4  
5  
6  
7  
8  
9  
10 **TITLE: Patient's experiences of acupuncture and counselling for depression and comorbid pain: a**  
11 **qualitative study nested within a randomised controlled trial.**  
12

13  
14  
15  
16  
17 Ann Hopton<sup>1</sup>, Hugh MacPherson<sup>1</sup>, Janet Eldred<sup>1</sup>

18  
19 <sup>1</sup> *Department of Health Sciences, University of York, UK*  
20

21  
22 **Keywords;** depression, comorbid pain, primary care, acupuncture, humanistic counselling  
23  
24  
25  
26  
27  
28  
29  
30  
31  
32  
33  
34  
35  
36  
37  
38  
39

40 **Address for correspondence:**

41 Ann Hopton  
42 Research Fellow  
43 Department of Health Sciences  
44 University of York  
45 Heslington  
46 York YO10 5DD  
47 United Kingdom  
48 Tel: 01904 321384  
49 E-mail: [ann.hopton@york.ac.uk](mailto:ann.hopton@york.ac.uk)  
50

51  
52 Words 6,737  
53  
54  
55  
56  
57  
58  
59  
60

**ABSTRACT****Introduction**

Depression and pain frequently occur together, yet we have insufficient knowledge of how this comorbidity impacts on outcomes of treatment for depression from the patient's perspective. This study aimed to explore patients' experiences of depression, the processes of change within acupuncture and counselling, and the elements that contributed to longer-term change.

**Methods**

In a sub-study nested within a randomised controlled trial of acupuncture or counselling compared to usual care alone for depression, semi-structured interviews of 52 purposively sampled participants were conducted and analysed using thematic analysis.

**Results**

Differences were reported by participants regarding their experience of depression with comorbid pain compared to depression alone. Along with physical symptoms often related to fatigue and sleep, participants with depression and comorbid pain generally had fewer internal and external resources available to manage their depression effectively. Those who had physical symptoms and were receiving acupuncture commonly reported that these were addressed as part of the treatment. For those receiving counselling, there was less emphasis on physical symptoms and more on help with gaining an understanding of themselves and their situation. Over the course of treatment, most participants in both groups reported receiving support to cope with depression and pain independently of treatment, with a focus on relevant lifestyle and behaviour changes. The establishment of a therapeutic relationship and their active engagement as participants were identified as important components of treatment.

**Conclusion**

Participants with and without comorbid pain received acupuncture or counselling for depression, and reported specific identifiable treatment effects. The therapeutic relationship and participants' active engagement in recovery may play distinct roles in driving long term change. This study has implications for policy makers and providers of care for primary care when considering referral of patients with depression and comorbid pain.

(Words=290)

**Strengths**

- The 52 telephone interviews were obtained from a wide range of participants in socially diverse settings and provide rich data on the participants' experiences of depression and the treatment received in the ACUDep trial.
- The thematic analysis was conducted using a bottom-up process to allow the themes to develop directly from the participants' own words, and we present the positive and negative experiences of each form of treatment, whether treatment was beneficial or not
- Our findings identify mechanisms within the processes of change that are specific to acupuncture and counselling that facilitate reduction in the symptoms of depression

**Limitations**

- Participants' may have attributed changes directly to treatment rather than concurrent, coincidental contextual changes.
- There is a possibility of recall bias; however, it is likely that the participants recalled the aspects of treatment that were most salient to them.
- Telephone interviews prevented the interviewer gathering non-verbal contextual information, although this form of interview was more acceptable to participants than a face-to-face interview.

## INTRODUCTION

Chronic pain is commonplace in half to two-thirds of participants with major depressive disorder. [2,3] The association between pain and depression becomes stronger as the severity of either increases,[4,5] and the impact of both problems on each other plays an important role in the development and maintenance of chronicity in health problems.[6] Participants with depression and comorbid pain are difficult to diagnose, feel an increased burden of disease, tend to rely heavily on health care services and are more difficult to treat.[7] Identifying and managing the pain symptoms that commonly occur alongside symptoms of depression may be important in improving depression response and remission rates.[8]

There is a growing evidence base in support of the effectiveness of acupuncture for a range of musculoskeletal conditions[9,10] however, despite its widespread use by participants[11], there has been limited evidence for acupuncture as an effective treatment option for depression.[12] The evidence for counselling as a treatment for depression is also limited[13] despite widespread utilisation in primary care in the UK, with around 90% of general practices providing on site counselling services.[14] To address this evidence gap, a randomised controlled trial (ACUDep) compared acupuncture or counselling to usual care as treatments for primary care participants with ongoing depression in primary care.[15] The results showed that both acupuncture and counselling were clinically effective in reducing depression in the short to medium term.

In a quantitative sub-study nested within this trial, which focused on the effect of comorbid pain on the outcome of treatment for depression, it was found that approximately 50% of the ACUDep participants had co-morbid pain with depression and that the participants' pain scores at baseline predicted the outcome of treatment for depression at the three-month follow up point.[16]

Not enough is known about how experiences of depression, both with and without comorbid pain, change as a result of receiving the treatments of acupuncture, counselling and usual care. The aim of this qualitative study, which is nested within the ACUDep trial, is to explore these experiences. A secondary aim is to report the aspects of treatment that patients' report might have had a positive influence on long- term change.

## METHODS

### Setting

This research comprised a qualitative sub-study nested within the trial of acupuncture or counselling provided as an adjunct to usual care compared to usual care alone. [15]

### Participants

Within the ACUDep trial,[15] 755 participants aged 18 and over with a history of on-going depression and score of 20 or more on the Beck Depression Inventory (BDI-II) were recruited by general practitioners at 27 primary care practices across Yorkshire, Durham County and Northumberland. Participants were allocated remotely by the York Trials Unit, with the allocation code concealed from the recruiting researcher, to three groups in the proportions of 2:2:1 to acupuncture, counselling and usual care alone respectively. Within the acupuncture arm, 23 acupuncturists registered with the British Acupuncture Council for a minimum of three years delivered up to 12 acupuncture treatments per patient, usually weekly. Treatments were tailored to individual participants' needs within a trial protocol [17], which included treating symptoms according to traditional Chinese medicine theory and the integration of relevant life-style support into the treatment strategy based on acupuncture-specific advice if considered appropriate by the acupuncturists. Within the counselling arm, 37 counsellors registered with the British Association of Counselling and Psychotherapy provided up to 12 sessions of humanistic counselling delivered

1  
2  
3 according to a trial protocol [18] which stated; “Counsellors will use empathy and advanced listening  
4 skills to help clients express feelings, clarify thoughts, and reframe difficulties, but they will not give  
5 advice or set homework. Deviations from the trial protocol were permissible if considered necessary  
6 and recorded in the participants’ log book. Usual care comprised the treatment that patients  
7 typically receive in primary care along with over-the-counter medication. Common prescribed  
8 medication included anti-depressants and analgesics. Participants were followed up over a period of  
9 12 months after randomisation by postal questionnaire at 3, 6, 9 and 12 months.  
10

11 In this nested qualitative sub-study, a purposive sampling frame was prepared to recruit  
12 interviewees in the same 2:2:1 proportion of the main trial, to include 50% males and females in  
13 each arm and to balance whether in pain at baseline or not. On receipt of their final 12 month  
14 postal questionnaire and based on a sampling frame (see Supplement 1), a sample of participants  
15 who had previously consented to be contacted for an interview were invited to engage in a  
16 telephone interview of approximately 30 minutes duration. Altogether 52 people consented to a  
17 one-to-one, audio-recorded, semi-structured telephone interview for this study.  
18  
19

### 20 Interviews

21 A researcher (AH) interviewed all 52 participants. The researcher was unknown to the participants  
22 prior to the interview, therefore the interview opened with an introduction designed to set the  
23 participant at ease, to reveal the context for their depression, and to draw out the participants’  
24 account of treatment received as part of the trial. Prompts from a prepared topic guide were used to  
25 elicit the participants’ experiences of depression and treatment. (See Supplement 2) The topic guide  
26 had been piloted previously.  
27  
28

29 On average the interviews lasted approximately 25 minutes (range 11-46 minutes). To encourage  
30 participants to relax, each participant was asked to introduce themselves by speaking about things  
31 they like to do or hoped to do and then how depression had entered their lives, before moving on to  
32 the research-related questions within the topic guide. Interviews were audio-taped, transcribed  
33 verbatim and checked for accuracy. All recordings were of sufficient clarity and content that no  
34 repeat interviews were necessary. Each transcription was checked to remove any names and  
35 assigned a participant identification number.  
36  
37

### 38 Analytical methods

39 An inductive thematic analysis [19] was used to search across the dataset of 52 transcribed  
40 interviews. Using a constructivist approach to grounded theory,[20] data was analysed initially by AH  
41 by reading each transcript several times, then annotating ideas to generate a list of potential  
42 inductive codes developed from the dataset to capture and summarise the participants’ experiences.  
43 Coding was performed sequentially on each transcript, initially without software, working  
44 systematically throughout the entire dataset. As codes were identified, they were recorded and  
45 organised on an Excel spread-sheet; sections of text that demonstrated that code were then added  
46 and collated moving back and forth across the data set in an iterative process.  
47  
48

49 Coding and extractions were checked by JE to verify that the participants’ experiences were  
50 reflected and summarised accurately. As coding progressed, comparisons were made between  
51 codes and phrases and those with similar context or concepts were grouped together. This process  
52 was conducted within each interview and across interviews resulting in a codebook of 33 codes,  
53 seven subthemes and two themes associated with the experience of depression, (Table 1) and a  
54 codebook of 35 codes and four themes associated with the experience of the treatment; (Table2).  
55 The coding and identification of themes were discussed and developed throughout between AH, HM  
56 and JE.  
57  
58  
59  
60

1  
2  
3  
4  
5  
6  
7  
8  
9  
10  
11  
12  
13  
14  
15  
16  
17  
18  
19  
20  
21  
22  
23  
24  
25  
26  
27  
28  
29  
30  
31  
32  
33  
34  
35  
36  
37  
38  
39  
40  
41  
42  
43  
44

| CODES                           | SUBTHEMES       | THEMES                          |
|---------------------------------|-----------------|---------------------------------|
| Muscular pain                   | Pain            |                                 |
| Headaches                       |                 |                                 |
| Gastro-intestinal pain          |                 |                                 |
| Disability                      |                 |                                 |
| Search for diagnosis            |                 |                                 |
| Tired all the time              | Fatigue         | Reported symptoms of depression |
| Exhausted- worn out             |                 |                                 |
| Debilitated                     |                 |                                 |
| No energy                       |                 |                                 |
| Withdrawal                      |                 |                                 |
| Insomnia                        | Sleep disorders |                                 |
| Early waking                    |                 |                                 |
| Nightmares                      |                 |                                 |
| Too much sleep                  |                 |                                 |
| Low self esteem                 | Negative schema |                                 |
| What other people think         |                 |                                 |
| Guilt and self-blame            |                 |                                 |
| Black and white thinking        |                 |                                 |
| Family life                     | Home life       |                                 |
| Motherhood                      |                 |                                 |
| Caring                          |                 |                                 |
| Bereavement                     |                 |                                 |
| Isolation                       |                 |                                 |
| Shift pattern                   | Work strain     | Contextual factors              |
| Work overload                   |                 |                                 |
| Drive, motivation               |                 |                                 |
| High bar, aiming high           |                 |                                 |
| Crime                           | Victimhood      |                                 |
| Bullied/ threat/ physical abuse |                 |                                 |
| Self-harm                       |                 |                                 |
| Childhood                       |                 |                                 |

45 To understand the participants' individual experiences of depression and the treatments received,  
46 the codes and themes were developed into a diagram (see Supplement 3) and populated with  
47 participants' identity numbers. This enabled the researcher (AH) to trace each participant and their  
48 journey throughout the process, and to make distinctions between those with depression and  
49 comorbid pain, and those with depression alone.  
50

51 Throughout this paper the themes are illustrated with quotes that capture and embody the  
52 participants' experiences embedded within the analytical narrative as suggested by Braun and  
53 Clarke. [19] Additional illustrative quotes are set out in Supplements 4-8  
54  
55  
56  
57  
58  
59  
60

**Table 2. Coding tree; A summary of the relationships between codes and themes for the positive and negative experience of treatment; factors that influence long term change and mediating factors**

| CODES                                            |                       | THEME                        |
|--------------------------------------------------|-----------------------|------------------------------|
| Beliefs and attitudes                            | Pre-treatment factors | Mediating factors            |
| Previous experience of treatment                 |                       |                              |
| Participant engagement                           | In treatment factors  |                              |
| Therapeutic relationship                         |                       |                              |
| Change of perspective                            | (common to all arms)  |                              |
| Reduced medication                               |                       |                              |
| Relaxation                                       |                       |                              |
| Complaints & symptoms treated                    |                       |                              |
| Self-understanding                               | (counselling)         | Positive experiences         |
| Acceptance of situation                          |                       |                              |
| Empowerment                                      |                       |                              |
| Effective medication                             |                       |                              |
| Referral to NHS mental health services           |                       |                              |
| Adverse events                                   |                       |                              |
| Terminology                                      | (acupuncture)         |                              |
| Time consuming                                   |                       |                              |
| Fear of needles                                  |                       |                              |
| Difficulty opening up                            |                       |                              |
| Clichéd phrases                                  |                       | Negative experiences         |
| Opened a can of worms                            |                       |                              |
| Expense                                          |                       |                              |
| Side effects of medication                       |                       |                              |
| Long wait after referral                         |                       |                              |
| Lack of general practitioner time and continuity |                       |                              |
| Ageism                                           |                       |                              |
| Exercise advice                                  |                       |                              |
| Dietary advice                                   | Lifestyle strategies  |                              |
| Reduce alcohol intake                            |                       |                              |
| Take time out                                    |                       | Long term behavioural change |
| Day to day structure                             |                       |                              |
| Distraction                                      | Cognitive strategies  |                              |
| Thinking strategies learned                      |                       |                              |
| Self- talk & Stoicism                            |                       |                              |
| Social contact                                   |                       |                              |
| Seeking support                                  |                       |                              |

**RESULTS**

**Participants recruited**

1  
2  
3 Of the 755 participants randomised in the ACUDep trial, 518 had consented to be interviewed and  
4 674 completed their 12-month follow up. Of these, 464 (69%) were potentially eligible to join the  
5 study. Of the 61 participants invited, four declined participation and three did not respond. A total of  
6 52 participants, comprising 24 men, and 28 women with an age range of 22 to 89 years (mean 46  
7 years, SD 13.8) were interviewed. At baseline, 26 of these participants had reported having  
8 moderate or extreme pain or discomfort on the EQ5D questionnaire; these people formed the pain  
9 group, the remainder formed the no-pain comparator group. As part of the ACUDep trial, 22 of the  
10 52 had been randomised to receive acupuncture, 20 to counselling and 10 received usual-care alone.  
11 A summary is presented in the sampling frame in Supplement 1. On average, those allocated to  
12 acupuncture attended 11 sessions (range 4-12) and those allocated to counselling attended 10  
13 sessions (range 6-12).  
14

### 15 **Symptoms experienced with depression and contextual factors**

16 Participants reported a range of symptoms they experienced concurrently with depression:  
17 predominantly, pain, fatigue and sleep disorders (see Supplements 3-4). Most participants with  
18 depression and comorbid pain suffered from either persistent headaches or moderate to extreme  
19 muscular skeletal pain that predated the onset of depression and compromised their mobility, to the  
20 extent that four men had considered suicide, and one man had attempted suicide. Almost half of  
21 those in pain experienced sleep disturbances or an overwhelming loss of energy to the point where  
22 much of their time was spent in bed, withdrawing from social and day-to-day activities. (See  
23 Supplement 3)  
24  
25

26  
27 *“There are times when things like headaches and neck aches prevent sleep... I sort of drift 48*  
28 *hours without sleeping... I have in the past been, if you like, down for a prolonged period of*  
29 *time...just sleep and sleep and sleep and sleep and wake up and do something for half an*  
30 *hour and then go back to sleep again. I can just about function with pain killers... The only*  
31 *time I did try to top myself that led to even more depression because I couldn't even do that*  
32 *right! I'd taken a boat load of the diazepam I was on, to try and calm me down. I'd sort of*  
33 *stock piled some of that...washed it all down with Glenfiddich, and instead of, you know, just*  
34 *shuffling off quietly, all I did was end up waking up feeling absolutely dreadful in a puddle of*  
35 *my own vomit, and it was one of those things where, you know, it took me weeks afterwards,*  
36 *thinking well, I can't even kill myself properly.”(p25,M,coun)*  
37  
38

39  
40 With regards to contextual factors, for the majority of the pain group, the pain they experienced  
41 had compromised their ability to work. Very few had social support, and for some, their being at  
42 home meant that they were the family member available to take on a caring role for a relative,  
43 which incurred further stress, ill health and isolation. (See supplement 5)  
44

45 *“Because I was off and not working I was able to have the time to look after my elderly*  
46 *mother and aunt who were both in their 80s. So I was their carer for 4 years and*  
47 *unfortunately I lost both of them and my father 4 years ago, within 6 months of each*  
48 *other...My IBS is certainly related to depression yeah...When I was looking after the old*  
49 *dears, as I call them, I was offered an operation twice and I turned it down because I didn't*  
50 *want to be, you know, incapacitated and not able to look after them. Once they passed on, I*  
51 *was then able to address my own health problems.” (p26,M,coun)*  
52

53  
54 In summary, for the participants with depression and comorbid pain, the symptoms experienced  
55 impacted on the most basic level of physiological needs, and reduced their ability to engage in social  
56 activity, whilst the contextual factors compromised their security through reduced income. Together  
57  
58  
59  
60



1  
2  
3 these factors suggest that this group of people have few internal and external resources remaining  
4 to effectively manage their depression.

5  
6 Of the participants who were pain-free at baseline, several people complained of tension headaches  
7 or gastro-intestinal symptoms they experienced at times of heightened stress and anxiety. Several  
8 others identified distinct patterns of disordered sleep; either difficulty in settling to sleep or a  
9 pattern of early wakening. Similar to the pain group, a few tended to withdraw at times when they  
10 felt particularly low in mood.  
11

12  
13 *“I get a lot of stomach problems actually when I feel depressed...And of course, really tired as  
14 well – very, very tired when I’m feeling down...Sometimes I find it really hard to cope with  
15 people. I can possibly be a bit grumpy sometimes, or really quiet. Because I can’t really face  
16 talking to anybody on certain days...I just can’t bear it.” (p57,F,uc)*

17  
18 Regarding contextual factors, the majority in the no-pain comparator group were in full or part-time  
19 employment or were relatively affluent retired professional people. For many, their experience of  
20 depression concerned feelings of low self-esteem brought about by high expectations of themselves  
21 within their working life, or hectic social schedules. Others experienced low self-esteem and threats  
22 to their security from bullying at work or as a victim from domestic violence.  
23

24  
25 *“We’re also dance teachers, which is supposed to be a hobby but has somehow involved  
26 taking over our lives... we’re teaching three nights a week, so it’s a bit of a commitment for a  
27 hobby... Because when we started teaching last May time... that did give me more of an  
28 impetus to actually make the effort, because once you’ve got teaching you’ve got to go,  
29 because you’re going to let people down. And I’m always glad that I do. If I’m having low  
30 days now, I’m always glad that I’ve been, because I’m concentrating on stuff that’s  
31 completely outside of me or completely outside of my normal life... One of the things that’s  
32 come through is that I hate letting people down. I’m very hard on myself.” (p45,F,coun)*

33  
34 *“I tend to keep my things bottled up... And it really gets me down. My work suffers. My home  
35 life suffers. And everything suffers if I’m really bogged down with something...following a  
36 particular incident, or a series of incidents... I chose to or had to be the brunt for a lot of the  
37 aggression and violent behaviour that this man displayed at the time. So if you like, there  
38 was a particular traumatic... there was a starting point for it.” (p38,M,coun)*

39  
40 In general, the no-pain comparator group experienced fewer demands physiologically. Most had  
41 their basic security and social needs met, this group had larger reserves of both internal and external  
42 resources available to them to cope with their depression.  
43

#### 44 **Processes of change reported by those receiving acupuncture: positive and negative experiences**

45 The processes of change identified within the data formed three stages: primarily, developing a  
46 therapeutic relationship; secondly, the individual diagnosis and treatment of symptoms; and finally,  
47 engendering changes in health behaviours. Within the pain group and the no-pain comparator  
48 group, the positive experiences tended to facilitate the process of change at each stage, whilst  
49 negative experiences contributed to the barriers to change. Most participants welcomed the  
50 opportunity to try something different for their depression. The acupuncturists’ understanding of  
51 their symptoms and explanations of how acupuncture might help their particular problems initiated  
52 the development of a therapeutic relationship. In contrast, two people described their  
53 acupuncturist as brisk, efficient and professional, yet lacking in bedside manner.  
54  
55  
56  
57  
58  
59  
60

1  
2  
3 *"She was very positive about things...I think you have more of an intimate relationship with*  
4 *the person doing that rather than just a person in an office somewhere. You're physically*  
5 *involved."* (p11,M,acu)  
6

7 *"They could do with a course in empathy."* (p22,F,acu).  
8

9  
10 Within the second stage of treatment, for most participants, the therapeutic relationship was  
11 further fostered through the acupuncturist listening to the participants' concerns, and treating the  
12 symptoms of depression depending on what was diagnosed to be of most importance to the  
13 participant at that point. Within the pain group several people experienced relief from  
14 musculoskeletal pain which tended to last for a few hours or days after the session and  
15 improvement commonly built up over several sessions. Several also reported feeling deeply relaxed  
16 during the sessions and an uplifting sense of well-being afterwards.  
17

18 *"I thought it was quite a strange sort of feeling, but I sort of felt better quite quickly. And*  
19 *then I went to the second and the third, it was... it completely lifted my mood and it made me*  
20 *feel more motivated...It was almost as if a weight had been lifted off my head and all of a*  
21 *sudden I felt like some energy had come back."* (p3,M,acu)  
22

23  
24 With regards to negative experiences, one woman reported included extreme tiredness after the  
25 acupuncture session, a problem that was addressed by the acupuncturist by adjusting treatment  
26 during the next session, and one man with extreme back pain attributed needling pain to his  
27 damaged nerves from a previous injury. Both of these participants concluded that the treatment  
28 went well, however they also reported, *"It was not for me."* (p4,M, acu; p7,F,acu)  
29

30 *"she'd actually hit at the root for a problem that I have with my pain, because I think at one*  
31 *time she put a needle in me and I kicked her. Without wanting to I involuntarily kicked her.*  
32 *And she'd obviously hit upon -- I think there was one time when I kicked out and more than a*  
33 *few occasions where she'd twitched a nerve that obviously."* (p4,M,acu)  
34

35  
36 In contrast, within the no-pain group two participants who were worried about the potential pain of  
37 needling prior to starting the treatment later attributed the needling sensations to the healing  
38 process. Three men thought they would have been equally relaxed if they had just rested or gone for  
39 a massage, and two other participants found the sessions too time consuming.  
40

41 *"A little bit sceptical as to whether the treatments (acupuncture) work anyway. So it was for*  
42 *me like, if I go and get a sport massage, it was like the equivalent of that..."* (p13,M,acu)  
43

#### 44 **Factors that influenced long-term change reported by those receiving acupuncture.**

45 As treatment progressed, many participants reported that their acupuncturist began guiding them to  
46 make changes to their lifestyle in order to engender beneficial long-term outcomes. For most people  
47 with pain, fear of pain and potential injury posed a barrier to engaging in physical activity. The  
48 majority of the pain group reported being encouraged to take up gentle exercise for their overall  
49 health and they also distracted themselves during periods of low mood.  
50

51  
52 *"The things, they seem so small, but they are important. Things like, getting out and going*  
53 *for a walk and getting some fresh air. And just opening your eyes in the mornings and trying*  
54 *to cope with life."* (p7,F,acu)  
55

56  
57 *"He started about exercise, you know, how that can make you feel more up..."* (p8,acu)  
58  
59  
60

1  
2  
3  
4 *"I read a lot and try to keep my mind off it. Really."* (p9,F,acu)  
5

6 One man developed his own technique based on how he felt during the acupuncture to help him  
7 manage low moods, whilst another relied on monthly acupuncture treatments alone to stay well;  
8 another considered further treatments but found the cost prohibitive.  
9

10 *"I sort of developed this technique and I don't know, it was like... The way I was feeling*  
11 *during the acupuncture... I sort of clung on to this feeling that, or this technique of gaining*  
12 *that feeling, so I remember on a couple of occasions where I was out and about walking, and*  
13 *thinking about things that would normally would start leading me to start feeling a bit down,*  
14 *but it was like I'd been given this tool in my head and I just sort of – it just sort of went onto*  
15 *auto-pilot. It was like pulling those feelings away and just sort of throwing them*  
16 *away.... Well, it lasted for a while but it started subsiding."* (p1,M,acu)  
17  
18

19 *"I go for acupuncture now once a month and I find that any more than a month and I can feel*  
20 *myself sort of slipping and feeling really, you know, starting to get worse again. And then I*  
21 *go and I feel much, much better..."* (p3,M,acu)  
22

23 The advice given to the no-pain comparator group was qualitatively different; Acupuncturists  
24 advised on dietary change, the reduction of caffeine and alcohol, and relaxation, which varied with  
25 the presenting symptoms, and by gender. Those participants with least rapport also tended to be  
26 those who were less willing to make behavioural changes.  
27

28 *"She also helped with giving me other things that I can do. Suggesting different foods for me*  
29 *to eat to make me feel more energetic.... I was cold all the time and that made me feel more*  
30 *lethargic as well, because all I wanted to do was stay in and go to bed and stay warm. So she*  
31 *was suggesting that I literally ate warmer foods, and she gave me a list of sort of Chinese*  
32 *medicine sort of foods that they had."* (p20,F,acu)  
33  
34

35 In general, the process of change evolved in three stages. The therapeutic relationship and active  
36 engagement in recovery acted as mediators of the outcome throughout each stage of the process. In  
37 the short term, acupuncture often relieved physiological symptoms of depression and of comorbid  
38 pain. Longer-term improvement in depression was developed through the participants' active  
39 engagement in health promoting behaviours, supported by a positive therapeutic relationship.  
40 Several participants with comorbid pain had less physical ability to engage in lifestyle changes and  
41 tended to be the passive recipients of care. These participants often had fewer external resources in  
42 the form of finance and social contact to manage their depression and comorbid symptoms in the  
43 longer-term. Additional quotes are presented in Supplement 6.  
44  
45

#### 46 **Processes of change reported by those receiving counselling: positive and negative experiences**

47 Based on their previous experiences of counselling the majority of participants spoke of their low  
48 expectations of counselling. However when engaged with the counselling process within the trial,  
49 most reported being relieved to have someone to talk to in confidence. For both the pain and the  
50 no-pain groups, the process of change followed a common pathway: beginning with the participants'  
51 disclosure of personal information and being listened to.  
52

53 *"I found that process to be very valuable...I found X was very much listening and*  
54 *empathising, but maybe offered interpretation a bit more than the National Health person."*  
55 *(p37,M,coun)*  
56  
57  
58  
59  
60

1  
2  
3 For most participants this two-way active engagement appeared to nurture a therapeutic  
4 relationship between the participant and counsellor. Four male participants welcomed the  
5 opportunity to speak to a male counsellor, a choice which put them at their ease, and facilitated the  
6 process. Three others found difficulty engaging with their counsellor and attributed this problem to  
7 a personality clash. This presented an early barrier to the process of change.  
8

9  
10 *“A lot of it does depend on who the counsellor is...I'm saying probably same sex works better.  
11 They probably have a clearer understanding of the male mind... I found him particularly  
12 sympathetic and, you know, very constructive. I think that was...I was very pleased with the  
13 way it went...” (p40,M,coun)*

14  
15 *“Every single counselling cliché that you have about, oh it's parenting issues – she kind of  
16 wheeled them all out one after the other and they were already things that I'd thought  
17 about, considered and looked at and examined to the nth degree and then thought, no that's  
18 not the problem... It felt like she was reading a script almost – like a guidebook to deal with  
19 this kind of disorder...it was almost the complete opposite of what I felt like I needed.”  
20 (p28,M,coun)*

21  
22 A second stage of the process of change was often identified as occurring around midway within the  
23 course of treatment. The iterative process of participants' disclosure continued, with deeper  
24 exploration of their past, which helped to clarify the participant's understanding of themselves and  
25 their situation.  
26

27  
28 *“At the end of it, it actually for me opened up a can of worms really, and I think it did me  
29 more harm than good. A lot of my problems, especially with low self-esteem, come from the  
30 way I was brought up by my parents and my father especially. And its stuff that I'd never  
31 addressed and it brought it all out, actually. And I actually felt worse at the end of it... I don't  
32 feel so bad about it now, because I recognise why I am like I am and some of the problems I  
33 have, where they come from... Although I say they'd opened up a can of worms, and brought  
34 some upsetting experiences back... I think it was good to do that. Because those sort of  
35 things had been bottled up for many, many years... it's actually made me address them.”  
36 (p26,M,coun)*

37  
38 *“It made me realize that I just held everything in. From being a little girl, everything that had  
39 ever bothered me it was never talked about. You know, I'm quite lucky that I've never had  
40 any real abuse or anything like that. It's just that I've got memories of being a child and  
41 things were said and it hurt. And I just locked it away. And I did that for years.” (p41,F,coun)*

42  
43  
44 Several realized what factors triggered and perpetuated negative thoughts, some of which were  
45 unfounded. For one man with chronic pain this meant going through a grieving process for the loss  
46 of his former way of life before setting in place new ways of thinking and coping.  
47

48  
49 *“You know, I think that was the big thing that I got from it, you know – that I could see  
50 myself more positively after having the time with him. And understand that some of the  
51 negative thoughts that were coming to my mind were not reality, if you like. To let them sail  
52 past and focus on the good things that I've done in the past.” (p38,M,coun)*

53  
54 *“Everything that defined what I was has now gone. And it took an awful lot of grief, if you  
55 like, to come round to the fact that it was worth trying again”. (p25,M,coun)*  
56  
57  
58  
59  
60

1  
2  
3 The use of metaphors was particularly useful for de-cluttering unnecessary thoughts about their  
4 past; regaining perspective; setting their problems into context, and focussing on what was  
5 important.

6 *“the discussions were much more free than I’d kind of anticipated they might have been,*  
7 *was using metaphors and analogies and stuff like that, to be able to describe things and*  
8 *move through things. And the pictures were just coming to me in my head, like. I had one*  
9 *which was sort of like a circuit board and it felt like some of the wires were not quite wired*  
10 *up properly and they weren’t working and stuff like that. And I can kind of track the*  
11 *metaphors throughout the whole process and it feels like it was much more of a – like it all*  
12 *opened up.” (p38,M,coun)*

### 14 **Factors that influenced long term change reported by those receiving counselling**

15 The final stage in the process of change was directed towards enabling the participants to maintain  
16 progress independently. Gender differences became apparent in the coping strategies adopted; the  
17 majority of women took up health and well-being strategies. Compared to the women in the pain  
18 group, the women in the no-pain comparator group were able to use a wider range of resources to  
19 cope with, and engage in social activities more easily. One woman recalls being given cognitive  
20 behavioural homework to overcome a particular anxiety.

21 *“She gave me sort of little exercises. I found it very difficult to walk down to a friend of mine.*  
22 *She lives in quite a built up area... People were sitting out in their gardens and I found it very*  
23 *intimidating. I didn’t like it. I’d become really sweaty, short of breath walking down through*  
24 *her estate to go and see her... basically she just taught me to get a grip on myself really, by*  
25 *pointing out, you know, that everything was going to be all right... short sharp steps really.*  
26 *And that I’d got the coping mechanisms and I could do it.” (p32,F,coun)*

27  
28  
29  
30  
31  
32 Many male participants appear to have continued to practise the cognitive strategies learned within  
33 the earlier sessions, and applied them to their life outside the sessions. However, male participants  
34 with depression and comorbid pain found greater difficulty sustaining these strategies and returned  
35 to their general practitioner for further help.

36  
37 In summary, the majority of participants had had previous experience of counselling, however their  
38 initial low expectations of success receded as the course of treatment progressed. A few counsellors  
39 practiced a more directive intervention than humanistic counselling, according to the need of the  
40 participant. The process of change comprised three stages, each mediated by the quality of the  
41 relationship and the participant’s active engagement. Additional quotes are presented in  
42 Supplement 7.

### 43 **Processes of change reported by those receiving usual care**

44  
45 Participants in all three arms received usual care throughout the trial. The process of change within  
46 usual care was less evident. Differences in the appraisal of general practitioner care were apparent:  
47 three older participants with depression and comorbid pain who were allocated to usual care alone  
48 complained of a lack of understanding and continuity of general practitioner and they felt  
49 abandoned without hope. One 89-year-old lady reported:

50  
51  
52 *“I would never go to a doctor again. I am, because I suffer a lot of pain that I needn’t have*  
53 *done if he’d been different...if he’d have listened to me instead of just pooh-poohing it off*  
54 *and saying, oh no, it’s not that. If he’d have really listened to what I was saying, he could*  
55 *have done more for me...he’s ignored what I’ve told him. Well, in fact he’s very often just*  
56 *ignored it all together. Pretended I hadn’t said it... You see, at my age you can’t really change*  
57  
58  
59  
60



1  
2  
3 *doctors. There's not many doctors want to take somebody on that's 90 years old, do they?*  
4 *When I'm having a really bad day... you know, and I feel I can't turn even to the doctors, you*  
5 *know, then yeah, I do get depressed."* (p51,F,uc)  
6

7 In contrast, the majority of participants who were pain free pointed to a relationship based on trust  
8 as being a component of their steady improvement over time. For most people a regular monthly 10  
9 minute consultation was helpful and constructive. A few felt that their general practitioner had  
10 made additional time for them when they were most in need.  
11

12 *"He sees me every month. I have monthly meetings with him just to have a general chat*  
13 *about how things are... I get on fine with him. As I say, I can talk about just about anything*  
14 *with him, so I suppose in a way, he's sort of, if anything he's been maybe a counsellor for me,*  
15 *because, you know, I can sit and talk to him about stuff..."* (p58,M,uc)  
16  
17

18 All participants at some time had been prescribed antidepressant medication. The majority of  
19 participants on long term antidepressant medication raised concerns about the side effects;  
20 participants in the pain group were particularly concerned about the potential effects of mixing  
21 medication for their other medical problems with their antidepressants. A few acknowledged that  
22 they needed antidepressants to maintain long term stability.  
23

24 *"Staying on medication, it has transformed my life and made everybody else's life around me*  
25 *better as well. And I wish I'd have done it sooner... It must be four or five years now and yes,*  
26 *it's been life transforming... When I started on my medication and I could realize the*  
27 *difference – the two people I was, almost."* (p7,F,acu)  
28  
29

30 In addition to medication, during the period of the trial general practitioners referred participants to  
31 a range of secondary services: two young women received three sessions with a mental health link  
32 worker, an intervention which had enabled them regain control of their lives; three others had been  
33 advised to try online cognitive behavioural therapy which two found to be easily accessible and  
34 effective; one man at risk of suicide and was referred for urgent psychiatric help.  
35

36 *"I was referred rapidly to A&E and was assessed by X the psychiatrist. And I was put on to*  
37 *intensive home treatment. Which was invaluable. As a condition of not being sectioned..."*  
38 *(p59,M,uc)*  
39

40 Referrals for younger patients had been beneficial although the waiting times were long and not  
41 always found to be acceptable, leaving most patients without adequate support in at a time of crisis,  
42 and without sufficient money to pay for private care.  
43  
44

45 *"I go to the doctors and I have to wait a matter of I don't know how many months before I*  
46 *can get, you know, onto the counselling and you know, it's just like the moment's gone, sort*  
47 *of thing... Unfortunately that can cost a lot of money – I'm on benefit. I can't afford it...I*  
48 *don't hold out much hope."* (p50,F,uc)  
49

#### 50 **Factors that influenced long term change reported by those receiving usual care: positive and** 51 **negative experiences**

52 For those who received help via a referral, the advice followed a familiar pattern; to engage in  
53 lifestyle changes; to add structure to the daily routine and to use distraction to reduce the focus on  
54 the symptoms and negative feelings. However, without support the stoicism of 'forcing myself 'was a  
55 prominent default strategy among most usual care participants  
56  
57  
58  
59  
60

1  
2  
3 *"I force myself to do things and then I generally feel better"* (p57,F,uc)

4 *"It's forcing myself. Well, it's a survival strategy..."*(p59,M,uc)

5  
6 Overall, the continuity of always seeing the same general practitioner was reported to be important  
7 and beneficial. By contrast some older participants with depression and comorbid pain remained  
8 caught in a seemingly hopeless cycle of seeking diagnosis and treatment for a physical complaint and  
9 without resources to seek private health care services. Most patients who received acupuncture or  
10 counselling were also happy with the attention from their general practitioner, but had welcomed  
11 the additional treatment provided within the trial as an adjunct to their usual care. Supplement 8  
12 presents a number of representative quotes.  
13

## 14 **DISCUSSION**

### 15 **Principal findings**

16  
17 The participants' experiences of depression were a complex interplay of internal and contextual  
18 factors. Compared to participants with depression alone, participants with depression and comorbid  
19 pain had fewer internal and external resources available to effectively manage their depression in  
20 the longer-term. Processes of change comprising three stages were identified within acupuncture  
21 and counselling, each with specific active components. For both interventions, participants reported  
22 that the establishment of a therapeutic relationship and their active engagement helped them  
23 develop coping strategies that in turn helped them be more effective in reducing their depression in  
24 the longer-term. Gender differences were apparent; the majority of women utilised a wide range of  
25 health behaviours, distraction and social contact, whilst men relied predominantly on cognitive  
26 strategies to manage unhelpful negative thought processes.  
27  
28

### 29 **Strengths and Limitations**

30  
31 Qualitative analysis of participants' reports of acupuncture and counselling compared with usual  
32 care provided within a randomised controlled trial is novel. This study was nested within a 12-month  
33 randomised controlled trial of the effectiveness of acupuncture or counselling for depression  
34 compared to usual care. The 52 telephone interviews were obtained from a wide range of  
35 participants in socially diverse settings. The interviews provided rich data on the participants'  
36 experiences of depression and the treatment received in the trial. The thematic analysis was  
37 conducted using a bottom-up process to allow the themes to develop directly from the participants'  
38 own words. We have presented the positive and negative experiences of each form of treatment,  
39 whether treatment was beneficial or not, and we are able to enrich the quantitative results of  
40 effectiveness of the treatments offered with the qualitative data.  
41  
42

43 These qualitative findings are concordant with, and supplement the quantitative data [16] from the  
44 ACUDep trial which showed that participants with moderate to extreme pain at baseline had worse  
45 outcomes at three months for depression than the no-pain comparator group in all three treatment  
46 arms. Our findings extend the findings of the trial's quantitative data in two ways: firstly, they offer  
47 insight into how pain and disability may erode the internal resources available for the effective  
48 management of depression. Moreover, these limitations compromise the person's security by  
49 reducing ability to generate external resources such as financial income and social contact. Secondly,  
50 based directly on participants' accounts, our findings identify mechanisms within the processes of  
51 change that are specific to acupuncture and counselling that facilitate reduction in the symptoms of  
52 depression.  
53  
54

55 Our study has some limitations. Participants' may have attributed changes directly to treatment  
56 rather than concurrent, coincidental contextual changes. There is a possibility of recall bias as it has  
57 long been known that there is a significant, stable association between depression and memory  
58  
59  
60

1  
2  
3 impairment [1] which may have altered what was recalled and how it was recalled. However, our  
4 aim was to learn more of the experiences of depression and treatment in the longer-term and it is  
5 likely that the participants recalled the aspects of treatment that were most salient to them. The lack  
6 of face-to face-contact during the telephone interviews prevented the interviewer gathering non-  
7 verbal contextual information such as social cues, body language, appearance, and setting to  
8 supplement the verbal answers of the interviewees. However, a recorded telephone interview was  
9 expected to be more acceptable to participants than a face-to-face interview in terms of time and  
10 anonymity.  
11

### 12 **Comparison to other studies**

13 That depression in the presence of pain is associated with a poorer response to treatment for the  
14 depression corresponds with previous studies of depression and pain comorbidity.[3,8] Patients with  
15 depression and comorbid pain tend to exhibit a cognitive bias specific to negative aspects of health  
16 and are more likely to report less favourable outcomes of treatment.[25] Many of the pain group  
17 participants had a musculoskeletal problem alongside their depression, and complained of fatigue  
18 and sleep disturbances. This cluster of symptoms has also been identified in 36% of older people  
19 suffering from osteoarthritis of the hip and knee. [21]

20 The characterisation of depression as a cycle of pain, fatigue and withdrawal that impacts on daily  
21 functioning, social activities is consistent with evidence showing that these factors create an  
22 enduring cycle of depression.[7,22] The cyclical nature of pain problems are known to activate  
23 catastrophic worry and accentuate the symptoms of depression; coping strategies such as relaxation  
24 and distraction techniques are a good way of regulating emotions if the pain is not too intense.[6]  
25 Older people with chronic pain and depression were identified in this study as the least satisfied with  
26 their primary care service, a finding which echoes earlier findings where patients with multiple  
27 physical complaints and depression posed a greater clinical burden[3,8] and were perceived as  
28 'difficult' by general practitioners.[2]  
29  
30  
31

32 With regards to the mechanisms of change, our findings identify three clear stages within  
33 acupuncture and counselling. The establishment of the therapeutic alliance in the early stages is an  
34 essential component from the outset of treatment. This extends the findings from within a  
35 pragmatic trial of acupuncture for back pain[23,24] and supports an earlier model of the process  
36 and mechanisms that contribute to ongoing change in counselling developed from the user  
37 perspective.[25] Historically, the therapeutic alliance has been regarded pejoratively as a placebo  
38 'feel good factor' based on the grounds that most individuals seek positive feedback to reinforce  
39 their own behaviour.[26] However, where this argument focuses on 'visiting' a therapist for advice  
40 and help, it misses the point that the intervention-specific advice and positive reinforcement used in  
41 conjunction with the participant's active engagement in their rehabilitation will activate beneficial  
42 behavioural change.[27] An earlier study found that some participants had difficulty putting self-care  
43 advice into practice, even when they were intellectually committed to and suggests that  
44 practitioners may need to follow up more carefully on the advice they have given.[28]  
45  
46  
47

### 48 **Implications for practice and future research**

49 Previous work has advocated that the management of depression and comorbid pain should involve  
50 the treatment of both physical and psychological components together, and the treatments should  
51 be customised and directed to addressing comorbidities.[29] Psychiatrists and general practitioners  
52 often feel ill-equipped to adequately manage the complex presentation of symptoms associated  
53 with depression and comorbid pain. A shift in care is required from the current focus on the medical  
54 aspects of physical health to an all-encompassing approach that takes into account the bio-  
55 psychosocial effects of depression and comorbid pain.[30] Future research should investigate the  
56 effectiveness of using a sequential strategy of acupuncture for early relief of symptoms, especially  
57  
58  
59  
60



1  
2  
3 where there are physical symptoms, followed by counselling to address deeper psychological issues  
4 and develop cognitive coping strategies to break out of the cycle of depression.  
5

## 6 **CONCLUSION**

7 Differences in the way depression is experienced by people with depression and comorbid pain  
8 impact on the participant's engagement with treatment and on the response to treatment for  
9 depression. The processes of acupuncture and counselling had specific identifiable effects that were  
10 beneficial to the majority of participants. The therapeutic relationship and participants' active  
11 engagement in recovery may play distinct roles in driving long-term management of depression and  
12 comorbid pain. This study has implications for policy makers and providers of care for primary care  
13 patients with depression and comorbid pain.  
14

## 15 **Legend Supplement 3.**

### 16 **Diagram showing the participants' experiences of depression and treatment.**

17 Numbers indicate participants reporting; Bold = participants with chronic pain; <sup>D</sup> = disabled  
18

## 19 **Acknowledgements**

20 We acknowledge the contribution of the patients, counsellors, acupuncturists and general medical  
21 practitioners; the ACUDep trial management team; and Anne Burton for transcription services.  
22

## 23 **Contributors**

24 Ann Hopton (MSc) is a female research fellow from a nursing background whose research focuses on  
25 the non-pharmacological management of chronic pain and depression. Ann Hopton conducted the  
26 interviews and analysis, interpreted the data, drafted and revised the article.  
27

28 Dr Janet Eldred is a female qualitative researcher and research administrator whose interests are  
29 based on feminist theology and older peoples' research. Janet Eldred assisted with coding, advised  
30 on analysis and gave final approval for the paper  
31 publication.  
32

33 Dr Hugh MacPherson is a practising acupuncturist and senior research fellow specialising in the  
34 effectiveness, cost-effectiveness, mechanisms and safety in the evaluation of complementary  
35 medicine. Hugh MacPherson revised critically important intellectual content and gave final approval  
36 for publication.  
37  
38

## 39 **Ethics**

40 Ethical approval was obtained from the York NHS Research Ethics Committee (09/H1311/75).  
41

## 42 **Funding**

43 Funding: This article presents independent research funded by the National Institute for Health  
44 Research (NIHR) under its Programme Grants for Applied Research Programme (RP-PG-0707-10186).  
45 The views expressed are those of the author(s) and not necessarily those of the National Health  
46 Service, the NIHR or the Department of Health. The funders, and the University of York in its role as  
47 sponsor for the study, had no role in study design, data collection and analysis, decision to publish,  
48 or preparation of the manuscript.  
49  
50  
51  
52  
53  
54  
55  
56  
57  
58  
59  
60

## REFERENCES

- 1 Burt DB, Zembar MJ, Niederehe G. Depression and memory impairment: A meta-analysis of the association, its pattern, and specificity. *Psychological Bulletin* 1995;**117**:285–305. doi:10.1037/0033-2909.117.2.285
- 2 Katona C, Peveler R, Dowrick C, *et al.* Pain symptoms in depression: definition and clinical significance. *Clinical Medicine* 2005;**5**:390–5. doi:10.7861/clinmedicine.5-4-390
- 3 Arnow BA. Comorbid Depression, Chronic Pain, and Disability in Primary Care. *Psychosomatic Medicine* 2006;**68**:262–8. doi:10.1097/01.psy.0000204851.15499.fc
- 4 Bair M, Robinson R, Katon W, *et al.* Depression and pain comorbidity. *ArchInternMed* 2003;**163**:2433–45.
- 5 Kroenke K, Wu J, Bair MJ, *et al.* Reciprocal Relationship Between Pain and Depression: A 12-Month Longitudinal Analysis in Primary Care. *The Journal of Pain* 2011;**12**:964–73. doi:10.1016/j.jpain.2011.03.003
- 6 Linton SJ, Nicholas MK, MacDonald S, *et al.* The role of depression and catastrophizing in musculoskeletal pain. *European Journal of Pain* 2011;**15**:416–22.
- 7 Tylee A, Gandhi P. The Importance of Somatic Symptoms in Depression in Primary Care. *Prim Care Companion J Clin Psychiatry* 2005;**7**:167–76.
- 8 Kroenke K, Shen J, Oxman TE, *et al.* Impact of pain on the outcomes of depression treatment: Results from the RESPECT trial. *Pain* 2008;**134**:209–15. doi:10.1016/j.pain.2007.09.021
- 9 Vickers AJ, Cronin AM, Maschino AC, *et al.* Acupuncture for Chronic Pain: Individual Patient Data Meta-analysis. *ArchInternMed* 2012;**172**:1–10.
- 10 Lam M, Curry P. Effectiveness of Acupuncture for Nonspecific Chronic Low Back Pain: A Systematic Review and Meta-analysis. *Spine* 2013;**38**:2124–38. doi:10.1097/01.brs.0000435025.65564.b7
- 11 Hopton AK, Curnoe S, Kanaan M, *et al.* Acupuncture in practice: mapping the providers, the patients and the settings in a national cross-sectional survey. *BMJ Open* 2012;**2**.<http://bmjopen.bmj.com/content/2/1/e000456.abstract>
- 12 Smith CA, Hay PP. Acupuncture for depression. *CochraneDatabaseSystRev* 2005; CD004046.
- 13 Bower P, Knowles S, Coventry PA, *et al.* Counselling for mental health and psychosocial problems in primary care. *Cochrane Database Syst Rev* 2011; CD001025. doi:10.1002/14651858.CD001025.pub3
- 14 Barnes D, Hall J, Evans R. Survey of the Current Provision of Psychological Therapy Services in Primary Care in the UK. Artemis Trust 2008.

1  
2  
3 [http://www.bacp.co.uk/admin/structure/files/pdf/2440\\_pl\\_438\\_artemis\\_report\\_web\\_s](http://www.bacp.co.uk/admin/structure/files/pdf/2440_pl_438_artemis_report_web_small.pdf)  
4 [mall.pdf](http://www.bacp.co.uk/admin/structure/files/pdf/2440_pl_438_artemis_report_web_small.pdf) (accessed 10 Feb2014).  
5

- 6  
7 15 MacPherson H, Richmond S, Bland M, *et al.* Acupuncture and Counselling for Depression  
8 in Primary Care: A Randomised Controlled Trial. *PLoS Medicine* 2013;**10**:e1001518.  
9 doi:10.1371/journal.pmed.1001518
- 10  
11 16 Hopton AK, MacPherson H, Keding A, *et al.* Acupuncture, counselling or usual care for  
12 depression and comorbid pain: secondary analysis of a randomised controlled trial.  
13 2014.  
14
- 15 17 MacPherson H, Schroer S. Acupuncture as a complex intervention for depression: a  
16 consensus method to develop a standardised treatment protocol for a randomised  
17 controlled trial. *Complement TherMed* 2007;**15**:92–100.  
18
- 19 18 MacPherson H, Richmond S, Bland MJ, *et al.* Acupuncture, Counseling, and Usual care  
20 for Depression (ACUDep): study protocol for a randomized controlled trial. *Trials*  
21 2012;**13**:209.  
22  
23
- 24 19 Braun V, Clarke V. Using thematic analysis in psychology. *Qualitative Research in*  
25 *Psychology* 2006;**3**:77–101.  
26
- 27 20 Charmaz K. *Constructing Grounded Theory: A practical guide through qualitative*  
28 *analysis*. London: Sage 2006.  
29
- 30 21 Murphy SL, Lyden AK, Phillips K, *et al.* Subgroups of older adults with osteoarthritis  
31 based upon differing comorbid symptom presentations and potential underlying pain  
32 mechanisms. *Arthritis Research & Therapy* 2011;**13**:R135. doi:10.1186/ar3449  
33  
34
- 35 22 Alderson SL, Foy R, Glidewell L, *et al.* How patients understand depression associated  
36 with chronic physical disease – a systematic review. *BMC Family Practice* 2012;**13**:41.  
37 doi:10.1186/1471-2296-13-41  
38
- 39 23 MacPherson H, Thomas K. Self-help advice as a process integral to traditional  
40 acupuncture care: implications for trial design. *Complement TherMed* 2008;**16**:101–6.  
41  
42
- 43 24 Hopton A, Thomas K, MacPherson H. The Acceptability of Acupuncture for Low Back  
44 Pain: A Qualitative Study of Patient’s Experiences Nested within a Randomised  
45 Controlled Trial. *PLoS ONE* 2013;**8**:e56806. doi:10.1371/journal.pone.0056806  
46  
47
- 48 25 Perren S, Godfrey M, Rowland N. The long-term effects of counselling: The process and  
49 mechanisms that contribute to ongoing change from a user perspective. *Counselling and*  
50 *Psychotherapy Research* 2009;**9**:241–9. doi:10.1080/14733140903150745  
51
- 52 26 Wall M, Wheeler S. Benefits of the placebo effect in the therapeutic relationship.  
53 *Complementary Therapies in Nursing and Midwifery* 1996;**2**:160–3. doi:10.1016/S1353-  
54 6117(96)80050-3  
55  
56  
57  
58  
59  
60

- 1  
2  
3 27 Bair MJ, Matthias MS, Nyland KA, *et al.* Barriers and Facilitators to Chronic Pain Self-  
4 Management: A Qualitative Study of Primary Care Patients with Comorbid  
5 Musculoskeletal Pain and Depression. *Pain Medicine* 2009;**10**:1280–90.  
6 doi:10.1111/j.1526-4637.2009.00707.x  
7  
8  
9 28 Evans M, Paterson C, Wye L, *et al.* Lifestyle and Self-Care Advice Within Traditional  
10 Acupuncture Consultations: A Qualitative Observational Study Nested in a Co-Operative  
11 Inquiry. *The Journal of Alternative and Complementary Medicine* 2011;**17**:519–29.  
12 doi:10.1089/acm.2010.0749  
13  
14 29 Lavigne GJ, Nashed A, Manzini C, *et al.* Does Sleep Differ Among Patients with Common  
15 Musculoskeletal Pain Disorders? *Current Rheumatology Reports* 2011;**13**:535–42.  
16 doi:10.1007/s11926-011-0209-3  
17  
18  
19 30 National Collaborating Centre for Mental Health. CG91: Depression in adults with a  
20 chronic physical health problem: Treatment and management. British Psychological  
21 Society & the Royal College of Physicians 2010. <http://www.nice.org.uk/CG91>  
22  
23  
24  
25  
26  
27  
28  
29  
30  
31  
32  
33  
34  
35  
36  
37  
38  
39  
40  
41  
42  
43  
44  
45  
46  
47  
48  
49  
50  
51  
52  
53  
54  
55  
56  
57  
58  
59  
60

Supplement 1.

Sampling frame of the participants interviewed:

NB. Declined =4; No response=3

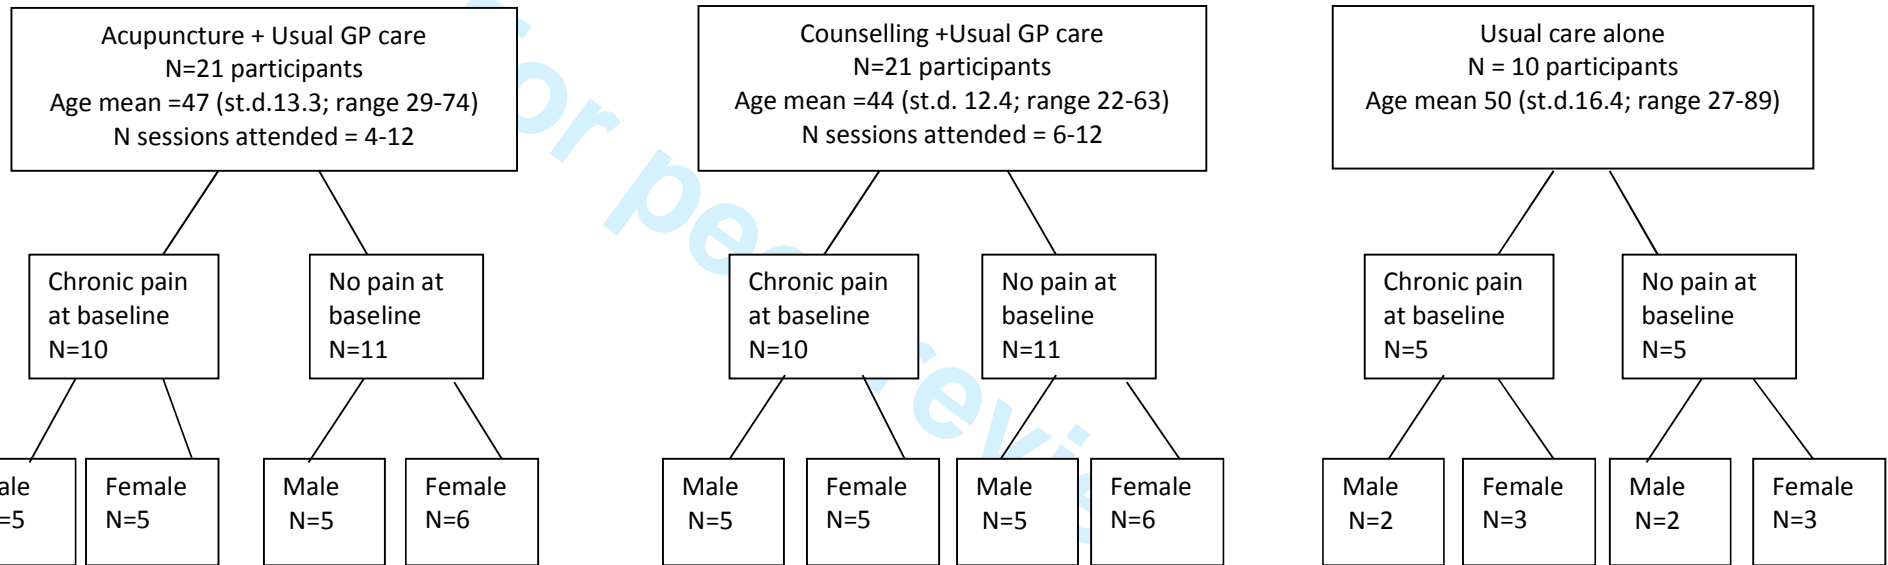

**Supplement 2: Topic Guide for in-depth interviews**

1. Background information:
  - a) sociological profile: age gender
  - b) social support: family, friends, colleagues, carers
  - c) activities: physical exercise - outdoors-indoors, leisure activities, activities that expressly involve aesthetics, resting
  - d) interests: hobbies, dreams, imagination, future plans
  - e) food: diet, cooking, eating out
2. Personal experience of depression, co-morbidity
3. Previous experience with health services and treatments for depression
4. Experience and perceptions of the actual treatment (acupuncture, counselling and usual care) received within the trial
5. Perceived outcomes of treatment
6. Personal beliefs about the effectiveness of different types of treatments
7. Personal preferences for different types of treatments

**Research Question 1)**

**To what extent is pain also present with depression, and how has the depression (and pain if present), changed over time as a response to receiving a course of acupuncture or counselling?**

- 1) Could you tell me a little bit about yourself and about things you like to do, or hope to do.  
Prompt
  - How has your depression affected your life over the past few months/years?
- 2) Could you tell me about your experience of the treatment you received for depression during the trial?  
Prompt
  - It's been 12 months since your treatment started, what changes have you noticed during that time

1  
2  
3  
4  
5  
6  
7 **Research Question 2)**  
8

9 **What aspects of the treatment influenced long term change?**  
10

- 11 1) Has the treatment helped you understand/learn more about your depression?  
12 Prompt  
13 • Are there things you can do that will help to manage it?  
14  
15 2) What was it about the treatment that helped you understand or learn more about  
16 depression? And your pain?  
17 Prompts  
18 • Have you learned anything about how to manage your depression or pain? (If so, what?)  
19 • Have you adopted any different ways of coping with your depression or pain?  
20  
21 3) Has your understanding of yourself changed in any way during the trial?  
22 Prompt  
23 • How do you feel about yourself now compared to before?  
24  
25  
26  
27  
28

29 **Research Question 3)**  
30

31 **How satisfied are you with the treatment received?**  
32

33 Prompts

- 34 • How did the treatment you received on the trial compare to treatment you have had  
35 before? e.g. GP, mental health service, private, other...?  
36 • What aspect of the treatment did you like/dislike /gave you concern and why?  
37 • Do you think the other treatments would be more or less effective  
38  
39  
40  
41  
42  
43  
44  
45  
46  
47  
48  
49  
50  
51  
52  
53  
54  
55  
56  
57  
58  
59  
60

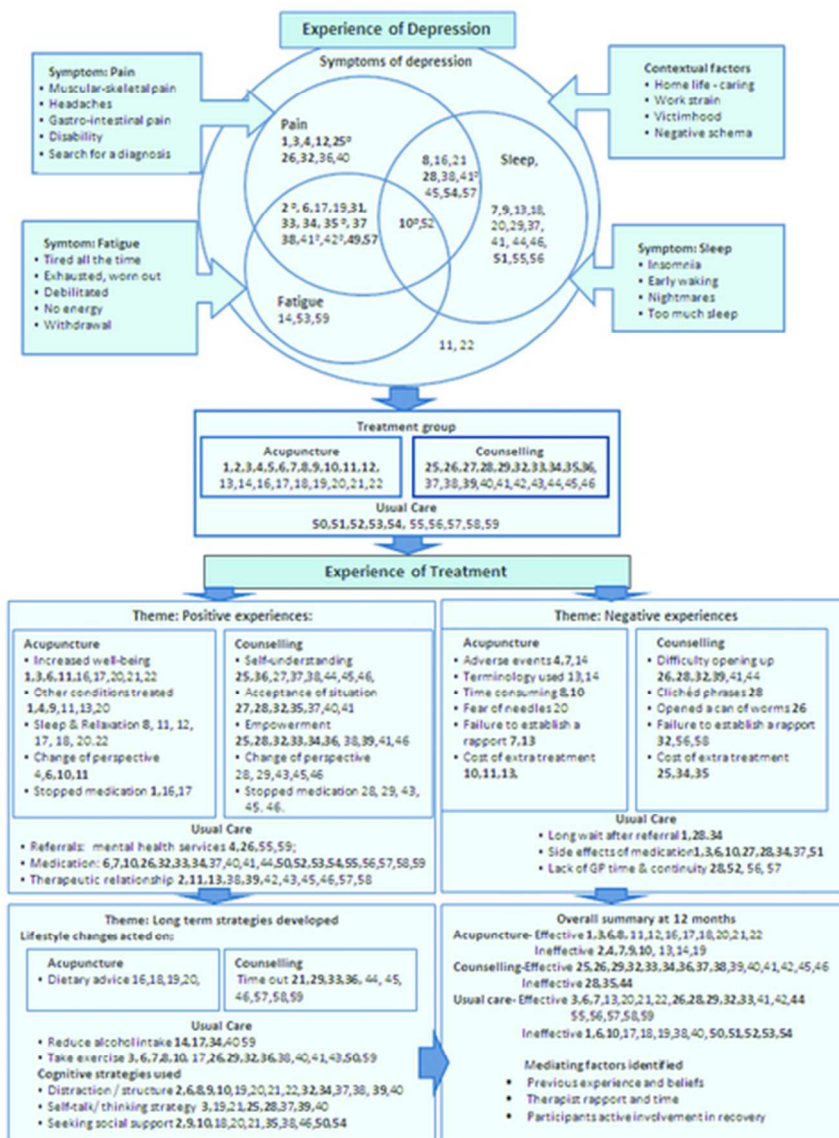

Legend Supplement 3.  
 Diagram showing the participants' experiences of depression and treatment.  
 Numbers indicate participants reporting; Bold = participants with chronic pain; D = disabled

20x27mm (600 x 600 DPI)



| Supplement 4. Symptoms of depression                                                                                                                                                                                                                                                                                                                                                                                                                                                                                                                                                                                                                                                                                                                                                                                                                                                                                                                                                                                            |
|---------------------------------------------------------------------------------------------------------------------------------------------------------------------------------------------------------------------------------------------------------------------------------------------------------------------------------------------------------------------------------------------------------------------------------------------------------------------------------------------------------------------------------------------------------------------------------------------------------------------------------------------------------------------------------------------------------------------------------------------------------------------------------------------------------------------------------------------------------------------------------------------------------------------------------------------------------------------------------------------------------------------------------|
| <p>“When I'm feeling really, really quite down, I find it difficult to actually get on with people. I'm very, very on the - I don't know whether the offensive, would be the right word, in the sense that I tend to read into things too much. Or take things far too literally...And obviously the defences go out there as well, so yeah. I do things without actually realising that in the sense that I might actually snap at people. So my behaviour does change.” (p1,M,acu)</p>                                                                                                                                                                                                                                                                                                                                                                                                                                                                                                                                        |
| <p>“I don't want to do things, you know. I almost, I struggle to sort of do things to motivate myself to get work done, or you know, go out and do something. And I tend to sort of stop at home and make excuses to go out really, and that's generally how it happens...” (p3,M,acu)</p>                                                                                                                                                                                                                                                                                                                                                                                                                                                                                                                                                                                                                                                                                                                                      |
| <p>“I do get an awful lot of headaches, which I've attributed to the side issues... I have suffered from headaches all my life... Since I had cancer... my migraines have become 10, 20, 30 times worse. And my headaches are 100 times worse... It's entirely possible...that it's linked to that (depression). But I couldn't just say for certain. I get terrible tension headaches, and I get bucket loads of back pain. It's a constant feature in my life, you know. Sadly it's probably what I would just term the norm these days.” (p12,M,acu)</p>                                                                                                                                                                                                                                                                                                                                                                                                                                                                     |
| <p>“Very fitful. Sometimes - it seems to be on a cycle and I keep saying I'm going to write this cycle down. Where I can't get to sleep. It's once every so often.... Sometimes it's terrible getting to sleep. And then I start thinking, which isn't helpful.” (p8,F,acu)</p>                                                                                                                                                                                                                                                                                                                                                                                                                                                                                                                                                                                                                                                                                                                                                 |
| <p>“Some days I just think I don't want to go out that door. I don't want to talk to anybody.... I get a lot of fatigue anyway, so I'm tired and I haven't got the energy to think some days.” (p10,F,acu)</p>                                                                                                                                                                                                                                                                                                                                                                                                                                                                                                                                                                                                                                                                                                                                                                                                                  |
| <p>“Everything around me was just black and negative... I would never allow myself go near that again.” (p13,M,acu)</p>                                                                                                                                                                                                                                                                                                                                                                                                                                                                                                                                                                                                                                                                                                                                                                                                                                                                                                         |
| <p>“I feel as if I've got a real heavy head, as if - not a headache as in a really painful headache, but it's just like I could just go and sit in a dark room and shut away for a time, to clear my head. It's just like it's a heavy feeling” (p21,F,acu)</p>                                                                                                                                                                                                                                                                                                                                                                                                                                                                                                                                                                                                                                                                                                                                                                 |
| <p>“I also had a bowel disease called diverticulitis, and I had an operation and part of my bowel removed 2 years ago and that's caused me problems obviously before then and since then, because they've now found that I've still got it but in another part of the bowel... I've had IBS for many years, about 15 years. And obviously when I get down and depressed, that really kicks in and the diverticular disease I've had pain all the time from that and that tends to be managed by sort of diet and medication... the likelihood is I'd end up with a colostomy, which I don't want. I'm trying to sort of manage the disease without having another operation... My IBS is certainly related to depression yeah.... When I was looking after the old dears, as I call them, I was offered an operation twice and I turned it down because I didn't want to be, you know, incapacitated and not able to look after them. Once they passed on, I was then able to address my own health problems.” (p26,M,coun)</p> |
| <p>I find that depends on my state of mind. How the day has been. If I'm feeling kind of happy and content with everything, then usually I get a full night's sleep. And if not, then it'll be up every couple of hours, just waking up for no apparent reason whatsoever...” (p28,M,coun)</p>                                                                                                                                                                                                                                                                                                                                                                                                                                                                                                                                                                                                                                                                                                                                  |
| <p>“Everything's such an effort... At one point I didn't even get out of bed. I didn't even want to get out of bed. I'd sort the children out and then I'd just go back to bed because it just hurt so much.... before I received treatment and before I was diagnosed with post-traumatic stress, you know, you'd get them off to school and I'd just left work at that point, and I would go back to bed and do nothing...” (p32,F,coun)</p>                                                                                                                                                                                                                                                                                                                                                                                                                                                                                                                                                                                  |
| <p>“at the time when things were bad I would get a lot of stomach, sort of indigestion type pain. But that was at the time when we were really sort of dealing with the sort of intensity of it...”(p38,M,coun)</p>                                                                                                                                                                                                                                                                                                                                                                                                                                                                                                                                                                                                                                                                                                                                                                                                             |
| <p>“the times when I don't feel good, my usual pattern would be to wake up like 4.00 am, something like that... well some nights having trouble getting to sleep, but more waking up and then not being able to get back to sleep” (p44,F,coun)</p>                                                                                                                                                                                                                                                                                                                                                                                                                                                                                                                                                                                                                                                                                                                                                                             |
| <p>“I'd lost so much weight as well. I've never been an overweight person, but I've always kind of fluctuated between a 10 and a 12. But the amount of weight that I had lost, just in the sort of like 2 or 3 months, was really drastic, you know, the clothes were hanging off and I looked very gaunt in my face.”(p46,F,coun)</p>                                                                                                                                                                                                                                                                                                                                                                                                                                                                                                                                                                                                                                                                                          |
| <p>“I didn't want - there were days when I just didn't want to go out of the house.... I was just constantly tired... there were days where I would get my little girl off to school and then come home and go to bed, and do very little before I had to go and pick her up.” (p50,F,uc)</p>                                                                                                                                                                                                                                                                                                                                                                                                                                                                                                                                                                                                                                                                                                                                   |
| <p>“If things aren't going too well generally here, then the arthritis seems worse. But whether that is psychosomatic or not I don't know I really don't know. ... one of the things I did say to the psychologist, and as bonkers as that sounds is, it's almost like the arthritis is punishing me for something I've done wrong.” (p52,F,uc)</p>                                                                                                                                                                                                                                                                                                                                                                                                                                                                                                                                                                                                                                                                             |
| <p>“I have got a lot of nightmares actually, that tend to wake me up... about three o' clock, something like that. It's a bit better now, but it did take me a long while to get back off to sleep. It wasn't as if I woke up and nodded back off again. I could be awake for a good hour... just wanted to turn my head off.”(p57,F,uc)</p>                                                                                                                                                                                                                                                                                                                                                                                                                                                                                                                                                                                                                                                                                    |
| <p>“it's stopped me doing things I used to enjoy doing. I'm not - it's made me tired a lot of the time. Agitated, grumpy, short-tempered... I used to do a lot of reading, which I hardly do any reading now. I used to go out on bike rides and I don't do that anymore. I used to go swimming; I stopped doing that... I get tired a lot.” (p58,M,uc)</p>                                                                                                                                                                                                                                                                                                                                                                                                                                                                                                                                                                                                                                                                     |

| <b>Supplement 5. Contextual factors</b>                                                                                                                                                                                                                                                                                                                                                                                                                                                                                                                                                                                                    |
|--------------------------------------------------------------------------------------------------------------------------------------------------------------------------------------------------------------------------------------------------------------------------------------------------------------------------------------------------------------------------------------------------------------------------------------------------------------------------------------------------------------------------------------------------------------------------------------------------------------------------------------------|
| <p>"I can't cope with bullying at all. I seemed to always get picked on. And I'd just end up getting depressed... Well it always seemed to be a friend, they'd pick on you. You know, they'd always make you feel a fool and – it wasn't actually bullying like thumping bullying. Just make you feel out of it... And it always seemed to have happened. So I sort of won't get close to anybody anymore." (p6,F,acu)</p>                                                                                                                                                                                                                 |
| <p>"My first husband died. My father died. And then everything's my fault then, you see. And I'm the one in the family that, if anything goes wrong, everybody comes to me."(p8,Facu)</p>                                                                                                                                                                                                                                                                                                                                                                                                                                                  |
| <p>"I've always had a tendency to go into waves of depression throughout my life.... It's a periodic thing. It comes and it's very difficult to know why it comes. But when it comes you really hit the trough and you go down and it's very hard to pick yourself up... It makes me extremely moody. It makes me extremely irritable. It makes me not enjoy anything about me. She (mother) was in and out of many mental institutions. And it created a great deal of difficulty within my life... It did affect me and made me very introverted."(p12,M,acu)</p>                                                                        |
| <p>"I'd got myself tied up into...over-valuing myself in relation to work.. I just started increasingly shutting people out that would try to get close to me. And I think that's probably because deep down I was fundamentally insecure and my kind of work outlet was my bit of success that was under my control... I'd just lost sight of things that were important." (p13,M,acu)</p>                                                                                                                                                                                                                                                |
| <p>"I felt I aimed too high and then I didn't sort of reach what I aimed to do. So I beat myself up a bit about it."(p20,F,acu)</p>                                                                                                                                                                                                                                                                                                                                                                                                                                                                                                        |
| <p>"It's predominantly an anxiety disorder and I think that then triggered the depression. It varies for no apparent reason whatsoever. It can be quite kind of crippling social anxiety sometimes and at other times it can be a kind of general waiting for something to go wrong; the kind of belief that there's always going to be something that's going to go wrong. And it just gets worse and worse and worse and I think it went on for such a long time that it just became how things are. That was just how my life was. Just waiting for something else to go wrong and being petrified of everything." (p28,M,coun)</p>     |
| <p>"I've been unemployed since November. I was employed. I left my work to look after my brother, who was poorly. And he died in November. Well I was hoping I was going to be a full-time carer for a lot longer than what it was, but it was only a matter of a few weeks, really."(p29,M,coun)</p>                                                                                                                                                                                                                                                                                                                                      |
| <p>"I'm too sensitive. I believe what people say. I'm very affected by what people think about me... whether it's where we live, or the close knit community that there is here, I still feel that we're outsiders... Whether it's we give off this aura that we don't belong or because we don't do things the way they should be done around here, I don't know. But we're still not part of anything. And we've been here 8 years. It's strange... I don't know why, apart from the fact I wasn't born here."(p35,F,coun)</p>                                                                                                           |
| <p>"I'm doing very well... But I struggle sometimes with the workload and controlling my emotions and things... Generally when I'm working, I'm a lot better. Because I like to be on the go, I like to be doing things, I like to be learning things. But I struggle though, because I'm dyslexic, and academic stuff really stresses me out. I think that's probably why I've been getting worse over the last month, because my deadline for my portfolio is tomorrow. And I know I'm worked up about that. And I've got an exam in May that I'm worked up about... at the moment I'm actually just purely overloaded."(p43,F,coun)</p> |
| <p>"I have had a job that's been pretty full on since December which has just finished. So all my energies went into that really. Which isn't healthy, I know, but I wanted to make a good job of the job, if you know what I mean."(p44,F,coun)</p>                                                                                                                                                                                                                                                                                                                                                                                       |
| <p>"I've lost a lot of confidence since I had the stroke and I'm a bit wary about going out in case it happens again and no-one's around, you know. I've lost all my confidence, really." (p51,F,uc)</p>                                                                                                                                                                                                                                                                                                                                                                                                                                   |
| <p>"I've needed help for a long time really, but... I'm finding it really hard to deal with, you know. Letters arrive and I daren't answer letters and a lot of the times when the phone rings, I don't really want to answer the phone because, you know, there's somebody chasing me for money or threatening me with legal proceedings, or..."(p54,M,uc)</p>                                                                                                                                                                                                                                                                            |
| <p>"I didn't sleep. I was very stressed and then I'd crash out as well. So I didn't sleep, I'd work really hard. I'd study really hard and then I'd crash.... I do set myself a high standard. But then I work to that standard but I don't push myself excessively to the point of collapse." (p55,F,uc)</p>                                                                                                                                                                                                                                                                                                                              |
| <p>"The way that it – the most debilitating manifestation for me I found myself spending the last three months living in one room in the house. And not going out. Escaping the world really...I had been depressed before and I kind of knew what I was getting myself into. And really just wanted to escape from there, but by the time I'd fully got myself round to wanting to tackle – it just slipped too far too quick and I couldn't actually cope on my own anymore."(p56,F,uc)</p>                                                                                                                                              |
| <p>"About caring for ill spouse) it's stopped me doing things I used to enjoy doing. I'm not – it's made me tired a lot of the time. Agitated, grumpy, short-tempered. I used to do a lot of reading, which I hardly do any reading now. I used to go out on bike rides and I don't do that anymore. I used to go swimming; I stopped doing that. I get tired a lot.... I go to bed at night but a lot of the time I'm not asleep before 12 and I'm usually awake about six...I've been known to sit down in an afternoon, and I've been asleep for an hour." (p58,M,uc)</p>                                                               |

| <b>Supplement 6. Experience of acupuncture treatment</b>                                                                                                                                                                                                                                                                                                                                                                                                                                                                                                                                                                                                                                                                                                                                                                                      |
|-----------------------------------------------------------------------------------------------------------------------------------------------------------------------------------------------------------------------------------------------------------------------------------------------------------------------------------------------------------------------------------------------------------------------------------------------------------------------------------------------------------------------------------------------------------------------------------------------------------------------------------------------------------------------------------------------------------------------------------------------------------------------------------------------------------------------------------------------|
| <p>“Well, you're relaxing anyway, in as much as you're just lying there. ... You're talking to him and you're passing the time of day and you're relaxing while he's doing it... I didn't feel any different at all....You're lying down and my ankles, elbows, and things like that and I didn't see what he was actually doing. And I'm just lying there passing the time of day, if you like. And at the end of it, I must admit, I didn't feel any different whatsoever.... There was nothing there that was to dislike. As I say, it was just really, well, it was a morning out.” (p2,M,acu)</p>                                                                                                                                                                                                                                        |
| <p>“100 times better. Not that I dislike my GP, I think he's fantastic, but you know, I've had counselling over the years and a lot of the problem was I did child protection work for most of my working life and eventually I became so depressed with it and I think this, you know, it's not talking it's treatment you go and have done like a physical treatment. ... I think that's really positive. And a lot more positive than talking to your GP. I think you get to the stage where you've just had enough discussion with people. You just want to feel better.... It made me feel better almost straight away. Whereas talking is a lot more emotional. It's taking a lot more emotion from you and it's also making you think and do things. Sometimes you don't want to do that, you just want to feel better.”(p3,M,acu)</p> |
| <p>“I'm crippled with arthritis. I walk with a walking aid... It was the acupuncture, which was really good. And I really felt it helped. You know, and it also seemed to be doing my back pain good.”(p6,F,acu)</p>                                                                                                                                                                                                                                                                                                                                                                                                                                                                                                                                                                                                                          |
| <p>“The very first session I had, I came home and I was utterly exhausted, for days... I just couldn't move one foot in front of another. It was really quite bizarre and I said to my husband, if this is what's going to happen every week, I really don't want to do this... I went back and I said, and she was lovely, because I think at first she thought I was not going to come any more. And I said, it made me so tired, please is there something you can do. And she said, oh yes, you could adjust – I don't know, whatever it was she could adjust – and after that I never felt that wretched again. I was absolutely fine... But as soon as I told her and she adjusted things it's never happened again.” (p7,F,acu)</p>                                                                                                    |
| <p>“I found that quite from the outset, you know, I soon got to think, oh, I think I'm feeling better. Quite quickly... with some people it works and I was getting a lot from it, while I was having it.... It was absolutely fine for maybe a couple of days, I felt, oh I'm getting better. But then as I stopped it, I thought, I don't feel -- for me, I think it would have to be an ongoing thing.”(p8,F,acu)</p>                                                                                                                                                                                                                                                                                                                                                                                                                      |
| <p>“It has helped me realise now when I'm getting depressed. It's just something trivial that's set me off and it's not such a big deal after all. I can work around that. And I think without the trial, I don't think I'd be where I am now.” (p10,F,acu)</p>                                                                                                                                                                                                                                                                                                                                                                                                                                                                                                                                                                               |
| <p>“I found I was coming out of the...building -- I don't know what you'd call it, in a more upbeat and elated manner. So for me personally, I have to say that I found the acupuncture to be a very positive thing in my life. It was something that I found made me feel an awful lot better in myself.... You have to ask yourself the question, does acupuncture work as a form of medicine. Or does some people fussing about your body give you a feel good factor?... I can't answer that... But I would say that I found acupuncture to be very positive in my life.”(p12,M,acu)</p>                                                                                                                                                                                                                                                  |
| <p>“The actual process itself wasn't at all painful. Occasionally she'd hit a sort of - a stinging pain – which she always said was something to do with the meridian or some acupuncture explanation... Walking home from it a couple of times I did feel a bit, I won't say light headed, but slightly different.” (p14,Macu)</p>                                                                                                                                                                                                                                                                                                                                                                                                                                                                                                           |
| <p>“It was quite relaxing when I was having the treatment, to be honest, which I didn't think it would be. But once I got used to it, and once the needles went in and she left me, that was my time to ... that was my time to relax... I used to look forward to going.” (p17,F,acu)</p>                                                                                                                                                                                                                                                                                                                                                                                                                                                                                                                                                    |
| <p>“It wasn't an explanation that made much sense to me in that it was about things like holding grief in your lungs or something -- what on earth does that mean? .....It just sounded like new-age nonsense, to be honest. It sounded unscientific, which I find very off-putting. You know, we need to respect the scientific method, it's how knowledge is acquired and it seemed to me that it wasn't expressed in terms that I could relate to in that kind of way.... on a kind of broader level it did seem to verge on the snake oil.” (p19,F,acu)</p>                                                                                                                                                                                                                                                                               |
| <p>“as the treatments went on, she sort of tried to give me more energy with different treatments. But then I was having problems with skin rashes and anxiety and things like that, so on other weeks she would treat me differently, depending on what happened that week, whether I'd been feeling more anxious or less anxious or more lethargic.... and she linked it to my menstrual cycle as well. Because when I was coming back in saying that I'd had a particularly bad week, she noticed before I did that that was probably PMS, which sounded really basic. I felt like a right idiot at the time, but obviously that kind of helped me at least find a reason for why...” (p20,F,acu)</p>                                                                                                                                      |
| <p>“I think that made a big difference because I knew I could feel the treatment instantly. Once the needles were in I could feel it, so I think that really sort of got me feeling positive because I felt as if it was doing me something good within my body. It was really acting for me and working for me... I did feel different and I did feel then as if I wanted to go – you know, the more I'd been the more I wanted to go and have another session!” (p21,F,acu)</p>                                                                                                                                                                                                                                                                                                                                                             |

| <b>Supplement 7. Experiences of counselling.</b>                                                                                                                                                                                                                                                                                                                                                                                                                                                                                                                                                                                                                                                                                                                                                                                                                                                                                                                                                 |
|--------------------------------------------------------------------------------------------------------------------------------------------------------------------------------------------------------------------------------------------------------------------------------------------------------------------------------------------------------------------------------------------------------------------------------------------------------------------------------------------------------------------------------------------------------------------------------------------------------------------------------------------------------------------------------------------------------------------------------------------------------------------------------------------------------------------------------------------------------------------------------------------------------------------------------------------------------------------------------------------------|
| <p>“He was talking about what triggers my major depressive episodes, and it was things like, he was talking about how to recognize the small things that then build into the big things, and how to deal with them and how to recognize them and how to put in place a system of recognizing what I can control and recognizing what I can't. So it was useful in that respect.” (p25,M,coun)</p>                                                                                                                                                                                                                                                                                                                                                                                                                                                                                                                                                                                                |
| <p>“I suppose that I would have liked her to have been a bit tougher. And sort of ask deeper questions, probably. It's always quite awkward I think, because you go there and you know, it's -- and you've got someone sitting opposite you smiling and thinking, well go on, say something, say something. And they're waiting for you to say something. But you don't know what to say. So it felt a bit strange.” (p26,M,coun)</p>                                                                                                                                                                                                                                                                                                                                                                                                                                                                                                                                                            |
| <p>“I felt as if I could talk to her openly and maybe try to get to the bottom of things. Just to see if there is something that could get me on the right road sort of thing... I feel as if it did help the first few months. And then things just steadily over the weeks got back to how it was before...when I had my counselling, I'm sure for two or three months afterwards I felt a lot more positive. I was living in my other house then. I was living in H where the town's quite busy. And I'm sure I was doing more and forcing myself to do more... I remember her saying that you've got to try and be more positive and try to take every day as it comes like and try to do different things. And I think it. I know in my mind what I should be doing. But it's just doing it... I sometimes listen to the radio. But it's usually the television if I'm not sleeping. And the television's just on. I'm not particularly watching anything – it's just on.” (p29,M,coun)</p> |
| <p>“Now I'm happy to put my proper clothes on that match -- as opposed to track suit bottoms and a really grotty t shirt, and not do my makeup and not do my hair. Whereas now I wouldn't dream of going out without having done my hair or my makeup. You know, I've always had my hair short, but I was letting it grow long, because I couldn't even face going to the hairdressers -- that would have been such a challenge.” (p32,F,coun)</p>                                                                                                                                                                                                                                                                                                                                                                                                                                                                                                                                               |
| <p>“She said I was a giver.... which means you give to everybody, but then you don't expect anything back. But she said everybody needs to have something back. You can't keep on giving and giving, because she said, you'll burn yourself out and that's not fair on you, she said, or on your family... [She] would say to me...it's all fallen back on you, hasn't it?... I only live down the road from my parents, and I can't see them struggling... They know that at the end of the day, it's me who's the reliable one, if you like.... She said, why should you have to be the one who's always doing that. Or who's expected to do it.”(p33,F,coun)</p>                                                                                                                                                                                                                                                                                                                              |
| <p>“Difficult to say... external changes made things a lot easier... a second job... a bit more money... the holiday abroad booked... it was difficult to tell whether it was her counselling that had helped me or the changes in our circumstances that had improved.”(p35,F,coun)</p>                                                                                                                                                                                                                                                                                                                                                                                                                                                                                                                                                                                                                                                                                                         |
| <p>“I thought it was helpful. At the time I was on a bit of an even keel, so I didn't really need it that much. But, you know, I still had problems and everything, so I found it really helpful just getting to know my own traits a bit more so that when I do have bad episodes... I don't think I really have changed. I think I feel a bit more insightful into things and maybe a bit more wise... Talking about your life and you know, it's not like he told me what to do and how to feel about things, but just asked the right questions and get you to talk things out in your own head. It's almost like you're having a conversation with yourself, it gives you the right...to think about the right things.” (p36,F,coun)</p>                                                                                                                                                                                                                                                    |
| <p>“And I thought well what, you know, what is this all about. I'm not getting anywhere. And then either she said something or I said something and it twigged... And I said to her, I said, it's like defragging a computer. And putting that stuff into little boxes, or into – and chucking out the stuff that the mind or the computer doesn't want. And as soon as I said that, things started to click into place...I don't know whether it was through trust probably, and seeing the right person, I was able to download, or offload all those things to L and she put it into perspective.” (p37,M,coun)</p>                                                                                                                                                                                                                                                                                                                                                                           |
| <p>“Before, I'd given up on life and I couldn't see a way forward. What was the point? Because I was physically unable to do anything I wanted to do. But now I look at it more positive.” (p42,F,coun)</p>                                                                                                                                                                                                                                                                                                                                                                                                                                                                                                                                                                                                                                                                                                                                                                                      |
| <p>“I think I'm doing all right. I know I'm hard on myself. I'm very hard on myself... but I'm not doing it consciously. I'm doing it unconsciously. So that is harder to control. Because I'm making decisions on something and not really thinking, I'm just doing it. And thinking, yeah, I can do this. And maybe I don't even know what I'm doing to set the bar... I'm setting the bar and not really thinking about it.” (p43,F,coun)</p>                                                                                                                                                                                                                                                                                                                                                                                                                                                                                                                                                 |
| <p>“I think my understanding of myself has changed beyond recognition. Yeah. I would say I'm a lot more self-aware and a lot more – you know, I do understand myself a lot better than I did a year ago. Not only that, I actually accept myself a lot more than I did a year ago. I can actually say, you know, this is me.” (p45,F,coun)</p>                                                                                                                                                                                                                                                                                                                                                                                                                                                                                                                                                                                                                                                   |
| <p>“I don't know, she sort of – you know when somebody says something and it just actually resonates. And it's a much more real experience. Things click into place, somehow... You know, just putting it into a visual – just in a way, I don't know, something just clicked. Something that I understood. I think they sort of tapped more into me as a person, and I wasn't just being talked at or... Because sometimes you can talk and you know that you're not connecting on any level and they don't understand you and they're not actually really listening to what you're saying.” (p44,F,coun)</p>                                                                                                                                                                                                                                                                                                                                                                                   |
| <p>“the counselling that I received and my domestic violence support, helped me to understand why I was feeling the way that I was and obviously to, you know, talk about the things that I was experiencing. And get it all off my chest. I'm in a much better place now... They listened. I didn't realize that I needed somebody to talk to.... So having somebody outside of that bubble.... if they needed to give me advice, then a professional, experienced opinion was easier and it would come across differently as well. And they could listen without getting upset... I think it was just having that outside person to possibly shed a tear with, who was not emotionally involved.” (p46,F,coun)</p>                                                                                                                                                                                                                                                                             |

| <b>Supplement 8. Experiences of usual care.</b>                                                                                                                                                                                                                                                                                                                                                                                                                                                                                                                                                                                                                                                                                                                                                                                                                                                                                                                                                                                                                                                                                                                                                                                                                                                                                                                                                                                                                                  |
|----------------------------------------------------------------------------------------------------------------------------------------------------------------------------------------------------------------------------------------------------------------------------------------------------------------------------------------------------------------------------------------------------------------------------------------------------------------------------------------------------------------------------------------------------------------------------------------------------------------------------------------------------------------------------------------------------------------------------------------------------------------------------------------------------------------------------------------------------------------------------------------------------------------------------------------------------------------------------------------------------------------------------------------------------------------------------------------------------------------------------------------------------------------------------------------------------------------------------------------------------------------------------------------------------------------------------------------------------------------------------------------------------------------------------------------------------------------------------------|
| <p>“I’m on antidepressants and I sort of go through good periods and bad periods and when I’m in a good period I try to come off the tablets, because I don’t want to be dependent on them. But I realise that by coming off the tablets, I needed them. And I had to go back onto them. And because I’m so worried about being dependent on them, you know.... there doesn’t seem to be any help out there, other than some tablets that will just keep me on an even keel. And sometimes the tablets even when I’m happy don’t even allow me to be as happy as I should be... Yeah, it’s like you’re just sort of on one level all the time. Yeah, you’re not depressed and you’re not anxious, but you just don’t get any excitement or, you know, at times when you should really. And it’s really weird. A weird thing really. It’s really hard to describe. You just can’t seem to muster up any enthusiasm... I was more concerned about my anxiety. I asked if there was any kind of drug that I could have just to control my anxiousness, you know. Something instantly, you know, when I could feel myself getting anxious. But there was nothing that they could prescribe for me... at the moment I just feel like I’ve reached a dead end. There’s nowhere else for me to go and nobody’s going to make me any better, other than continually giving me these drugs. There’s no treatment for me. There’s no treatment for me unless I pay for it.” (p50,F,uc)</p> |
| <p>“It’s kind of got to a stalemate really. I think that’s the way of it. I was trying to think about this, really. I think one of the things for me that kind of was a problem, if you’d want to call it that, was now everything’s on the repeat prescription thing, normally with my former doctor, you’d go once a month or whatever, just to get a repeat prescription. And that 10 minutes was kind of just enough to almost keep you going. And my old doctor I’d known for a long time. The new one, maybe only six years or so, but now because everything’s on repeat, I don’t think I saw her at all last year, because you just don’t need to... I normally do try and see her because obviously, you know, it’s easier in a way if you do see the same person, for them as well... the GPs just don’t have time, I mean, you’re there 10 minutes; there’s nothing much you can say, really. But I think that certainly for me, that not going regularly hasn’t helped... But unfortunately now, whatever care there is out there, it’s rationed – not rationed, it’s just that the time and the cost and you know – I think that’s just one of those things, isn’t it, really.” (p52,F,uc)</p>                                                                                                                                                                                                                                                                      |
| <p>“I’ve got fluoxetine tablets and they seem to have helped a bit, because I mean before I started taking them I was suicidal – I used to think about it quite a lot... supposed to take one a day, but I take one every other day. And it seems to have taken the edge off the panic. I don’t pace around the house as much as I used to do.... I worry about side effects. I’m on loads of other medication as well for... various other bits and pieces... It’s not that I’m worried about getting addicted to them. I just don’t want to be – I don’t want to take the edge off too much, you know what I mean... I’m still really depressed and I still think about suicide a lot. The mess I’m in at the moment is just unbelievable. It would take me all day to explain the mess I’m in... it’s just the people that it would upset if I did, you know. Like my son. And my dad. My dad’s not well and I don’t want to upset him either.” (p54,M,uc)</p>                                                                                                                                                                                                                                                                                                                                                                                                                                                                                                                |
| <p>“What he wanted to do was refer me to this, I think it was a link worker was what he said, and I went, and he said it will take a few months and you’ll get your appointment... I have to be honest, the doctor that I saw... he’s amazing. He is a particularly good doctor. He was actually the one that helped me with my fibre intolerance. It was always brushed off by other doctors and he realized that it was a real struggle for me and I was in a lot of pain. And with this as well, he was – he actually sat and listened and understood. And then he said, look I’ll recommend you, but there is a long wait. And I’ll put you on these tablets to tide you over, but I don’t think it’s for you. And I said, well neither do I, but I can’t – and I don’t know if it would have happened with any other doctor. How long I would have to have waited.” (p55,F,uc)</p>                                                                                                                                                                                                                                                                                                                                                                                                                                                                                                                                                                                          |
| <p>“I have seen a counsellor but I didn’t really find it beneficial... but I decided there and then that I didn’t want to pursue it. You know, I find sometimes that they talk in like, clichés. Do you know what I mean?... I think she was fairly experienced. She had like lots of candles and she had lots of alternative things, you know. Yeah, but I just felt, oh, I think we’re talking in clichés here. And it’s not really helping.” (p56,F,uc)</p>                                                                                                                                                                                                                                                                                                                                                                                                                                                                                                                                                                                                                                                                                                                                                                                                                                                                                                                                                                                                                   |
| <p>“I was referred to a counsellor last August, and it took six months for me to get the appointment through... And I had two sessions with this counsellor (link worker) and I was starting to feel a lot better and she said that I didn’t need to see her any-more and that I was managing to cope on my own, so it was really quick, but I did feel really good actually at the time... I had a couple of sessions with her. And I did feel really good. I felt really in control and everything... It just took an awfully long time to come through. And I could really have done with it at the time, rather than having to wait six months... You really need somebody to help you, well more or less straight away. A couple of weeks really. That was the problem with it.” (p57,F,uc)</p>                                                                                                                                                                                                                                                                                                                                                                                                                                                                                                                                                                                                                                                                             |
| <p>“The GP was very, very good. Recognised quite early on what was happening and basically put me on some antidepressants which were nominal. They didn’t really stop a downward slide but as she progressed – I mean she couldn’t actually refer me to anything straight away – she just wanted to make sure she was right... But she eventually said, you know exactly what you’re doing so you can regulate your own medication – it’s there, whatever you need at the time. Obviously if I need a review I go every six months or whatever for a complete review. And I can’t change medication myself, I can’t kind of prescribe myself something new, but the medication that I do take is available. It’s there on the... I can just go, I need some of that, and if it’s there I can have it. She trusts me to actually look after myself as it were. To draw up my own strategies for survival, if you like.” (p59,M,uc)</p>                                                                                                                                                                                                                                                                                                                                                                                                                                                                                                                                            |



## Consolidated criteria for reporting qualitative studies (COREQ): 32-item checklist

Developed from:

Tong A, Sainsbury P, Craig J. Consolidated criteria for reporting qualitative research (COREQ): a 32-item checklist for interviews and focus groups. *International Journal for Quality in Health Care*. 2007. Volume 19, Number 6: pp. 349 – 357

**YOU MUST PROVIDE A RESPONSE FOR ALL ITEMS. ENTER N/A IF NOT APPLICABLE**

| No. Item                                       | Guide questions/description                                                                                                                              | Reported on Page #   |
|------------------------------------------------|----------------------------------------------------------------------------------------------------------------------------------------------------------|----------------------|
| <b>Domain 1: Research team and reflexivity</b> |                                                                                                                                                          |                      |
| <i>Personal Characteristics</i>                |                                                                                                                                                          |                      |
| 1. Interviewer/facilitator                     | Which author/s conducted the interview or focus group?                                                                                                   | Methods              |
| 2. Credentials                                 | What were the researcher's credentials?<br>E.g. PhD, MD                                                                                                  | Contributors section |
| 3. Occupation                                  | What was their occupation at the time of the study?                                                                                                      | Contributors section |
| 4. Gender                                      | Was the researcher male or female?                                                                                                                       | Contributors section |
| 5. Experience and training                     | What experience or training did the researcher have?                                                                                                     | Contributors section |
| <i>Relationship with participants</i>          |                                                                                                                                                          |                      |
| 6. Relationship established                    | Was a relationship established prior to study commencement?                                                                                              | Methods              |
| 7. Participant knowledge of the interviewer    | What did the participants know about the researcher? e.g. personal goals, reasons for doing the research                                                 | Methods              |
| 8. Interviewer characteristics                 | What characteristics were reported about the interviewer/facilitator? e.g. Bias, assumptions, reasons and interests in the research topic                | Contributors section |
| <b>Domain 2: study design</b>                  |                                                                                                                                                          |                      |
| <i>Theoretical framework</i>                   |                                                                                                                                                          |                      |
| 9. Methodological orientation and Theory       | What methodological orientation was stated to underpin the study? e.g. grounded theory, discourse analysis, ethnography, phenomenology, content analysis | Methods              |
| <i>Participant selection</i>                   |                                                                                                                                                          |                      |
| 10. Sampling                                   | How were participants selected? e.g. purposive, convenience, consecutive, snowball                                                                       | Methods              |
| 11. Method of approach                         | How were participants approached? e.g. face-to-face, telephone, mail, email                                                                              | Methods              |

|                                        |                                                                                                                                 |                                    |
|----------------------------------------|---------------------------------------------------------------------------------------------------------------------------------|------------------------------------|
| 12. Sample size                        | How many participants were in the study?                                                                                        | Results                            |
| 13. Non-participation                  | How many people refused to participate or dropped out? Reasons?                                                                 | Results                            |
| <i>Setting</i>                         |                                                                                                                                 |                                    |
| 14. Setting of data collection         | Where was the data collected? e.g. home, clinic, workplace                                                                      | Methods                            |
| 15. Presence of non-participants       | Was anyone else present besides the participants and researchers?                                                               | Methods                            |
| 16. Description of sample              | What are the important characteristics of the sample? e.g. demographic data, date                                               | Results                            |
| <i>Data collection</i>                 |                                                                                                                                 |                                    |
| 17. Interview guide                    | Were questions, prompts, guides provided by the authors? Was it pilot tested?                                                   | Methods                            |
| 18. Repeat interviews                  | Were repeat inter views carried out? If yes, how many?                                                                          | N/A Methods                        |
| 19. Audio/visual recording             | Did the research use audio or visual recording to collect the data?                                                             | Methods                            |
| 20. Field notes                        | Were field notes made during and/or after the inter view or focus group?                                                        | Methods                            |
| 21. Duration                           | What was the duration of the inter views or focus group?                                                                        | Methods                            |
| 22. Data saturation                    | Was data saturation discussed?                                                                                                  | Methods                            |
| 23. Transcripts returned               | Were transcripts returned to participants for comment and/or correction?                                                        | N/A Methods                        |
| <b>Domain 3: analysis and findings</b> |                                                                                                                                 |                                    |
| <i>Data analysis</i>                   |                                                                                                                                 |                                    |
| 24. Number of data coders              | How many data coders coded the data?                                                                                            | Methods                            |
| 25. Description of the coding tree     | Did authors provide a description of the coding tree?                                                                           | Methods                            |
| 26. Derivation of themes               | Were themes identified in advance or derived from the data?                                                                     | Methods                            |
| 27. Software                           | What software, if applicable, was used to manage the data?                                                                      | N/A Methods                        |
| 28. Participant checking               | Did participants provide feedback on the findings?                                                                              | Methods                            |
| <i>Reporting</i>                       |                                                                                                                                 |                                    |
| 29. Quotations presented               | Were participant quotations presented to illustrate the themes/findings? Was each quotation identified? e.g. participant number | Results & Supplements 4-8          |
| 30. Data and findings consistent       | Was there consistency between the data presented and the findings?                                                              | Relationship to existing knowledge |
| 31. Clarity of major themes            | Were major themes clearly presented in the findings?                                                                            | Results                            |
| 32. Clarity of minor themes            | Is there a description of diverse cases or discussion of minor themes?                                                          | Results Negative views presented   |

# BMJ Open

**Patients' experiences of acupuncture and counselling for depression and comorbid pain: a qualitative study nested within a randomised controlled trial.**

|                                 |                                                                                                                                                                 |
|---------------------------------|-----------------------------------------------------------------------------------------------------------------------------------------------------------------|
| Journal:                        | <i>BMJ Open</i>                                                                                                                                                 |
| Manuscript ID:                  | bmjopen-2014-005144.R1                                                                                                                                          |
| Article Type:                   | Research                                                                                                                                                        |
| Date Submitted by the Author:   | 19-May-2014                                                                                                                                                     |
| Complete List of Authors:       | Hopton, Ann; University of York, Health Sciences<br>Eldred, Janet; University of York, Health Sciences<br>MacPherson, Hugh; University of York, Health Sciences |
| <b>Primary Subject Heading</b>: | Complementary medicine                                                                                                                                          |
| Secondary Subject Heading:      | Qualitative research, Patient-centred medicine, Mental health                                                                                                   |
| Keywords:                       | Depression, Pain management , PRIMARY CARE, MENTAL HEALTH                                                                                                       |
|                                 |                                                                                                                                                                 |

SCHOLARONE™  
Manuscripts



1  
2  
3  
4  
5  
6  
7  
8  
9  
10  
11  
12  
13  
14  
15  
16  
17  
18  
19  
20  
21  
22  
23  
24  
25  
26  
27  
28  
29  
30  
31  
32  
33  
34  
35  
36  
37  
38  
39  
40  
41  
42  
43  
44  
45  
46  
47  
48  
49  
50  
51  
52  
53  
54  
55  
56  
57  
58  
59  
60

**TITLE: Patients' experiences of acupuncture and counselling for depression and comorbid pain: a qualitative study nested within a randomised controlled trial.**

Ann Hopton<sup>1</sup>, Janet Eldred<sup>1</sup>, Hugh MacPherson<sup>1</sup>

<sup>1</sup> *Department of Health Sciences, University of York, UK*

**Keywords;** depression, comorbid pain, primary care, acupuncture, humanistic counselling

**Address for correspondence:**

Ann Hopton  
Research Fellow  
Department of Health Sciences  
University of York  
Heslington  
York YO10 5DD  
United Kingdom  
Tel: 01904 321384  
E-mail: [ann.hopton@york.ac.uk](mailto:ann.hopton@york.ac.uk)

## ABSTRACT

### Introduction

Depression and pain frequently occur together and impact on outcomes of existing treatment for depression. Additional treatment options are required.. This study aimed to explore patients' experiences of depression, the processes of change within acupuncture and counselling, and the elements that contributed to longer-term change.

### Methods

In a sub-study nested within a randomised controlled trial of acupuncture or counselling compared to usual care alone for depression, semi-structured interviews of 52 purposively sampled participants were conducted and analysed using thematic analysis.

### Results

Differences were reported by participants regarding their experience of depression with comorbid pain compared to depression alone. Along with physical symptoms often related to fatigue and sleep, participants with depression and comorbid pain generally had fewer internal and external resources available to manage their depression effectively. Those who had physical symptoms and were receiving acupuncture commonly reported that these were addressed as part of the treatment. For those receiving counselling, there was less emphasis on physical symptoms and more on help with gaining an understanding of themselves and their situation. Over the course of treatment, most participants in both groups reported receiving support to cope with depression and pain independently of treatment, with a focus on relevant lifestyle and behaviour changes. The establishment of a therapeutic relationship and their active engagement as participants were identified as important components of treatment.

### Conclusion

Participants with and without comorbid pain received acupuncture or counselling for depression, and reported specific identifiable treatment effects. The therapeutic relationship and participants' active engagement in recovery may play distinct roles in driving long-term change. For patients who present with both depression and physical symptoms of care may wish to consider a short course of acupuncture to relieve symptoms prior to a referral for counselling if needed.

ISRCTN63787732

### Strengths

- The 52 telephone interviews were obtained from a wide range of participants in socially diverse settings and provide rich data on the participants' experiences of depression and the treatment received in the ACUDep trial.
- The thematic analysis was conducted using a bottom-up process to allow the themes to develop directly from the participants' own words, and we present the positive and negative experiences of each form of treatment, whether treatment was beneficial or not.
- Our findings identify mechanisms within the processes of change that are specific to acupuncture and counselling that facilitate reduction in the symptoms of depression.

### Limitations

- Participants may have attributed changes directly to treatment rather than concurrent, coincidental contextual changes.
- There is a possibility of recall bias; however, it is likely that the participants recalled the aspects of treatment that were most salient to them.
- Telephone interviews prevented the interviewer gathering non-verbal contextual information, although this form of interview was more acceptable to participants than a face-to-face interview.

## INTRODUCTION

Chronic pain is commonplace in half to two-thirds of participants with major depressive disorder.[1][2] The association between pain and depression becomes stronger as the severity of either increases,[3][4] and the impact of both problems on each other plays an important role in the development and maintenance of chronicity in health problems.[5] Participants with depression and comorbid pain are difficult to diagnose, feel an increased burden of disease, tend to rely heavily on health care services and are more difficult to treat.[6] Identifying and managing the pain symptoms that commonly occur alongside symptoms of depression may be important in improving depression response and remission rates.[7] Previous qualitative research reports that patients with comorbid pain and depression identify the ineffectiveness of existing pain relief strategies, a lack of tailoring strategies to meet personal needs and difficulties with patient –physician interaction as barriers to the effective self-management of their symptoms.[8] Patients appreciate a health-care approach that is individualised [9]and are open to the value of complementary-health-care.[10] Two health-care options that offer these attributes are acupuncture and counselling.

There is a growing evidence base in support of the effectiveness of acupuncture for a range of musculoskeletal conditions;[11][12] however, despite its widespread use by participants[13] there has been limited evidence for acupuncture as an effective treatment option for depression.[14] Patients with strong preferences for psychotherapy or counselling for depression are not likely to engage in antidepressant treatment,[15] yet the evidence for counselling as a treatment for depression is limited[16] despite widespread utilisation in primary care in the UK, with around 90% of general practices providing on site counselling services.[17] To address this evidence gap, a randomised controlled trial (ACUDep) compared acupuncture or counselling to usual care as treatments for primary care patients with ongoing depression.[18] The results showed that both acupuncture and counselling were clinically effective in reducing depression in the short to medium term.

In a quantitative sub-study nested within this trial, which focused on the effect of comorbid pain on the outcome of treatment for depression,[19] it was found that approximately 50% of the ACUDep participants had co-morbid pain with depression and that the participants' pain scores at baseline predicted the outcome of treatment for depression at the three-month follow up point. A comparison of the treatments showed that patients with depression and comorbid pain had a better outcome in the short to medium-term with acupuncture.

The ACUDEP trial[18] was novel in its' investigation of acupuncture or counselling compared to usual care; yet in focusing on the clinical effectiveness of the treatments offered, the published results did not set out how the process of change occurred as a results of receiving the three treatments of acupuncture, counselling and usual care . To meet this evidence gap the aim of this qualitative study nested within the ACUDep trial, is to explore patients' reports of their experiences and identify from their reports how each intervention influences long-term change.

## METHODS

### Design

This research comprised a qualitative sub-study nested within a three-arm randomised controlled trial conducted between November 2009 and June 2012 of acupuncture or counselling provided as an adjunct to usual care compared to usual care alone alone.[18] In this nested qualitative sub-study, a purposive sampling frame was prepared to recruit interviewees in the same 2:2:1 proportion of the main trial, to include 50% males and 50% females in each arm and to balance whether in pain at baseline or not. The design used a constructivist approach to grounded theory[20] to ensure that the theories were constructed by the researchers as a result of their interaction with the area of the research and the participants.

## Participants

Within the ACUDep trial,[18] 755 participants aged 18 and over with a history of on-going depression and score of 20 or more on the Beck Depression Inventory (BDI-II) were recruited by general practitioners at 27 primary care practices across Yorkshire, County Durham and Northumberland. Participants were allocated remotely by the York Trials Unit, with the allocation code concealed from the recruiting researcher, to three groups in the proportions of 2:2:1 to acupuncture, counselling and usual care alone respectively. Within the acupuncture arm, 23 acupuncturists registered with the British Acupuncture Council for a minimum of three years delivered up to 12 acupuncture treatments per patient, usually weekly. Treatments were tailored to individual participants' needs within a trial protocol,[21] which included treating symptoms according to traditional Chinese medicine theory and the integration of relevant life-style support into the treatment strategy based on acupuncture-specific advice if considered appropriate by the acupuncturists. Within the counselling arm, 37 counsellors registered with the British Association of Counselling and Psychotherapy provided up to 12 sessions of humanistic counselling delivered according to a trial protocol[22] which stated: "Counsellors will use empathy and advanced listening skills to help clients express feelings, clarify thoughts, and reframe difficulties, but they will not give advice or set homework." Deviations from the trial protocol were permissible if considered necessary and recorded in the participant's log book. Usual care comprised the treatment that patients typically receive in primary care along with over-the-counter medication. Commonly prescribed medication included anti-depressants and analgesics. Participants were followed up over a period of 12 months after randomisation by postal questionnaire at 3, 6, 9 and 12 months. On receipt of their final 12-month postal questionnaire and based on a sampling frame (see Supplement 1), a sample of participants who had previously consented to be contacted for an interview were invited to engage in a telephone interview of approximately 30 minutes duration. Altogether 52 people consented to a one-to-one, audio-recorded, semi-structured telephone interview for this study.

## Interviews

A researcher (AH) interviewed all 52 participants. The researcher was unknown to the participants prior to the interview, therefore the interview opened with an introduction designed to set the participant at ease, to reveal the context for their depression, and to draw out the participant's account of treatment received as part of the trial. Prompts from a prepared topic guide were used to elicit the participants' experiences of depression and treatment. (See Supplement 2) The topic guide had been piloted previously and granted ethical approval by the University of York ethics committee.

All the interviews were conducted between February and May 2012. On average the interviews lasted approximately 25 minutes (range 11-46 minutes). Three participants were ill and felt fatigued, but were eager to participate; therefore exploration of the questions for these people was limited in time to prevent over-burdening them. To encourage participants to relax, each participant was asked to introduce themselves by speaking about things they like to do or hoped to do and then how depression had entered their lives, before moving on to the research-related questions within the topic guide. Interviews were audio-taped, transcribed verbatim and checked for accuracy. All recordings were of sufficient clarity and content that no repeat interviews were necessary. Each transcription was checked to remove any names and assigned a participant identification number.

## Analytical methods

An inductive thematic analysis[23] was used to search across the dataset of 52 transcribed interviews. Using a constructivist approach to grounded theory,[20] data was analysed initially by AH by reading each transcript several times, then annotating ideas to generate a list of potential inductive codes developed from the dataset to capture and summarise the participants' experiences. Coding was performed sequentially on each transcript, initially without software, working

systematically throughout the entire dataset. As codes were identified, they were recorded and organised on an Excel spread-sheet; sections of text that demonstrated that code were then added and collated moving back and forth across the data set making comparisons with previous data in an iterative process.

Coding and extractions were checked by JE to verify that the participants' experiences were reflected and summarised accurately. As coding progressed, comparisons were made between codes and phrases and those with similar context or concepts were grouped together. This process was conducted within each interview and across interviews resulting in a codebook of 33 codes, seven subthemes and two themes associated with the experience of depression, (Table 1) and a codebook of 35 codes and four themes associated with the experience of the treatment; (Table2). Saturation for the main themes occurred within each treatment option within 5-7 interviews. The coding and identification of themes were discussed and developed throughout between AH, HM and JE.

**Table 1. Coding tree; A summary of the relationships between codes, subthemes and themes for the experience of depression**

| CODES                           | SUBTHEMES       | THEMES                          |
|---------------------------------|-----------------|---------------------------------|
| Muscular pain                   | Pain            |                                 |
| Headaches                       |                 |                                 |
| Gastro-intestinal pain          |                 |                                 |
| Disability                      |                 |                                 |
| Search for diagnosis            |                 |                                 |
| Tired all the time              | Fatigue         | Reported symptoms of depression |
| Exhausted- worn out             |                 |                                 |
| Debilitated                     |                 |                                 |
| No energy                       |                 |                                 |
| Withdrawal                      |                 |                                 |
| Insomnia                        | Sleep disorders |                                 |
| Early waking                    |                 |                                 |
| Nightmares                      |                 |                                 |
| Too much sleep                  |                 |                                 |
| Low self esteem                 | Negative schema |                                 |
| What other people think         |                 |                                 |
| Guilt and self-blame            |                 |                                 |
| Black and white thinking        |                 |                                 |
| Family life                     | Home life       |                                 |
| Motherhood                      |                 |                                 |
| Caring                          |                 |                                 |
| Bereavement                     |                 |                                 |
| Isolation                       |                 |                                 |
| Shift pattern                   | Work strain     | Contextual factors              |
| Work overload                   |                 |                                 |
| Drive, motivation               |                 |                                 |
| High bar, aiming high           |                 |                                 |
| Crime                           | Victimhood      |                                 |
| Bullied/ threat/ physical abuse |                 |                                 |
| Self-harm                       |                 |                                 |
| Childhood                       |                 |                                 |

To understand the participants’ individual experiences of depression and the treatments received, the codes and themes were developed into a diagram (see Supplement 3) and populated with participants’ identity numbers. This enabled the researcher (AH) to trace each participant throughout the process and to make distinctions between those with depression and comorbid pain, and those with depression alone.

Throughout this paper the themes are illustrated with quotes that capture and embody the participants’ experiences embedded within the analytical narrative as suggested by Braun and Clarke.[23] Additional illustrative quotes are set out in Supplements 4-8.

**Table 2. Coding tree; A summary of the relationships between codes and themes for the positive and negative experience of treatment; factors that influence long term change and mediating factors**

| CODES                                            |                       | THEME                        |
|--------------------------------------------------|-----------------------|------------------------------|
| Beliefs and attitudes                            | Pre-treatment factors | Mediating factors            |
| Previous experience of treatment                 |                       |                              |
| Participant engagement                           | In treatment factors  |                              |
| Therapeutic relationship                         |                       |                              |
| Change of perspective                            | (common to all arms)  |                              |
| Reduced medication                               |                       |                              |
| Relaxation                                       | (acupuncture)         |                              |
| Complaints & symptoms treated                    |                       |                              |
| Self-understanding                               | (counselling)         | Positive experiences         |
| Acceptance of situation                          |                       |                              |
| Empowerment                                      |                       |                              |
| Effective medication                             | (usual care)          |                              |
| Referral to NHS mental health services           |                       |                              |
| Adverse events                                   | (acupuncture)         |                              |
| Terminology                                      |                       |                              |
| Time consuming                                   |                       |                              |
| Fear of needles                                  |                       |                              |
| Difficulty opening up                            | (counselling)         | Negative experiences         |
| Clichéd phrases                                  |                       |                              |
| Opened a can of worms                            |                       |                              |
| Expense                                          |                       |                              |
| Side effects of medication                       |                       |                              |
| Long wait after referral                         |                       |                              |
| Lack of general practitioner time and continuity |                       |                              |
| Ageism                                           |                       |                              |
| Exercise advice                                  | Lifestyle strategies  |                              |
| Dietary advice                                   |                       |                              |
| Reduce alcohol intake                            |                       | Long term behavioural change |
| Take time out                                    |                       |                              |
| Day to day structure                             |                       |                              |
| Distraction                                      |                       |                              |
| Thinking strategies learned                      | Cognitive strategies  |                              |
| Self- talk & Stoicism                            |                       |                              |
| Social contact                                   |                       |                              |
| Seeking support                                  |                       |                              |

## RESULTS

### Participants recruited

Of the 755 participants randomised in the ACUDep trial, 674 completed their 12-month follow up; 518 had consented to be interviewed and of these 518, 464 (89%) were potentially eligible to join the study. Of the 61 participants invited, four declined participation and three did not respond. A total of 52 participants, comprising 24 men, and 28 women with an age range of 22 to 89 years (mean 46 years, SD 13.8) were interviewed. At baseline, 26 of these participants had reported having moderate or extreme pain or discomfort on the EQ5D questionnaire; these people formed the pain group, the remainder formed the no-pain comparator group. As part of the ACUDep trial, 22 of the 52 had been randomised to receive acupuncture, 20 to counselling and 10 received usual-care alone. A summary is presented in the sampling frame in Supplement 1. On average, those allocated to acupuncture attended 11 sessions (range 4-12) and those allocated to counselling attended 10 sessions (range 6-12).

### Symptoms experienced with depression and contextual factors

Participants reported a range of symptoms they experienced concurrently with depression: predominantly pain, fatigue and sleep disorders (see Supplements 3-4). Most participants with depression and comorbid pain suffered from either persistent headaches or moderate to extreme muscular-skeletal pain that predated the onset of depression and compromised their mobility, to the extent that four men had considered suicide, and one man had attempted suicide. Almost half of those in pain experienced sleep disturbances or an overwhelming loss of energy to the point where much of their time was spent in bed, withdrawing from social and day-to-day activities. (See Supplement 3)

*"There are times when things like headaches and neck aches prevent sleep... I sort of drift 48 hours without sleeping... I have in the past been, if you like, down for a prolonged period of time...just sleep and sleep and sleep and sleep and wake up and do something for half an hour and then go back to sleep again. I can just about function with pain killers... The only time I did try to top myself that led to even more depression because I couldn't even do that right! I'd taken a boat load of the diazepam I was on, to try and calm me down. I'd sort of stock piled some of that...washed it all down with Glenfiddich, and instead of, you know, just shuffling off quietly, all I did was end up waking up feeling absolutely dreadful in a puddle of my own vomit, and it was one of those things where, you know, it took me weeks afterwards, thinking well, I can't even kill myself properly."(p25,M,coun)*

With regards to contextual factors, for the majority of the pain group, the pain they experienced had compromised their ability to work. Very few had social support, and for some, their being at home meant that they were the family member available to take on a caring role for a relative, which incurred further stress, ill health and isolation. (See supplement 5)

*"Because I was off and not working I was able to have the time to look after my elderly mother and aunt who were both in their 80s. So I was their carer for 4 years and unfortunately I lost both of them and my father 4 years ago, within 6 months of each other...My IBS is certainly related to depression yeah...When I was looking after the old dears, as I call them, I was offered an operation twice and I turned it down because I didn't want to be, you know, incapacitated and not able to look after them. Once they passed on, I was then able to address my own health problems." (p26,M,coun)*

In summary, for the participants with depression and comorbid pain, the symptoms experienced impacted on the most basic level of physiological needs, and reduced their ability to engage in social



1  
2  
3 activity, whilst the contextual factors compromised their security through reduced income. Together  
4 these factors suggest that this group of people have few internal and external resources remaining  
5 to effectively manage their depression.  
6

7  
8 Of the participants who were pain-free at baseline, several people complained of tension headaches  
9 or gastro-intestinal symptoms they experienced at times of heightened stress and anxiety. Several  
10 others identified distinct patterns of disordered sleep: either difficulty in settling to sleep or a  
11 pattern of early waking. Similar to the pain group, a few tended to withdraw at times when they  
12 felt particularly low in mood.  
13

14 *"I get a lot of stomach problems actually when I feel depressed...And of course, really tired as  
15 well – very, very tired when I'm feeling down...Sometimes I find it really hard to cope with  
16 people. I can possibly be a bit grumpy sometimes, or really quiet. Because I can't really face  
17 talking to anybody on certain days...I just can't bear it."* (p57,F,uc)  
18

19 Regarding contextual factors, the majority in the no-pain comparator group were in full or part-time  
20 employment or were relatively affluent retired professional people. For many, their experience of  
21 depression concerned feelings of low self-esteem brought about by high expectations of themselves  
22 within their working life, or hectic social schedules. Others experienced low self-esteem and threats  
23 to their security from bullying at work or as a victim from domestic violence.  
24

25 *"We're also dance teachers, which is supposed to be a hobby but has somehow involved  
26 taking over our lives... we're teaching three nights a week, so it's a bit of a commitment for a  
27 hobby... Because when we started teaching last May time... that did give me more of an  
28 impetus to actually make the effort, because once you've got teaching you've got to go,  
29 because you're going to let people down. And I'm always glad that I do. If I'm having low  
30 days now, I'm always glad that I've been, because I'm concentrating on stuff that's  
31 completely outside of me or completely outside of my normal life... One of the things that's  
32 come through is that I hate letting people down. I'm very hard on myself."* (p45,F,coun)  
33  
34

35 *"I tend to keep my things bottled up... And it really gets me down. My work suffers. My home  
36 life suffers. And everything suffers if I'm really bogged down with something...following a  
37 particular incident, or a series of incidents... I chose to or had to be the brunt for a lot of the  
38 aggression and violent behaviour that this man displayed at the time. So if you like, there  
39 was a particular traumatic... there was a starting point for it."* (p38,M,coun)  
40  
41

42 In general, the no-pain comparator group experienced fewer demands physiologically. Most had  
43 their basic security and social needs met; this group had larger reserves of both internal and external  
44 resources available to them to cope with their depression.  
45

#### 46 **Processes of change reported by those receiving acupuncture: positive and negative experiences**

47 The processes of change identified within the data formed three stages: primarily, developing a  
48 therapeutic relationship; secondly, the individual diagnosis and treatment of symptoms; and finally,  
49 engendering changes in health behaviours. Within the pain group and the no-pain comparator  
50 group, the positive experiences tended to facilitate the process of change at each stage, whilst  
51 negative experiences contributed to the barriers to change. Most participants welcomed the  
52 opportunity to try something different for their depression. The acupuncturists' understanding of  
53 their symptoms and explanations of how acupuncture might help their particular problems initiated  
54 the development of a therapeutic relationship. In contrast, two people described their acupuncturist  
55 as brisk, efficient and professional, yet lacking in bedside manner.  
56  
57  
58  
59  
60



1  
2  
3 *"She was very positive about things...I think you have more of an intimate relationship with*  
4 *the person doing that rather than just a person in an office somewhere. You're physically*  
5 *involved."* (p11,M,acu)  
6

7 *"They could do with a course in empathy."* (p22,F,acu).  
8

9  
10 Within the second stage of treatment, for most participants, the therapeutic relationship was  
11 further fostered through the acupuncturist listening to the participants' concerns, and treating the  
12 symptoms of depression depending on what was diagnosed to be of most importance to the  
13 participant at that point. Within the pain group, several people experienced relief from  
14 musculoskeletal pain which tended to last for a few hours or days after the session and  
15 improvement commonly built up over several sessions. Several also reported feeling deeply relaxed  
16 during the sessions and an uplifting sense of well-being afterwards.  
17

18 *"I thought it was quite a strange sort of feeling, but I sort of felt better quite quickly. And*  
19 *then I went to the second and the third, it was... it completely lifted my mood and it made me*  
20 *feel more motivated...It was almost as if a weight had been lifted off my head and all of a*  
21 *sudden I felt like some energy had come back."* (p3,M,acu)  
22

23  
24 With regards to negative experiences, one woman reported extreme tiredness after the acupuncture  
25 session, a problem that was addressed by the acupuncturist by adjusting treatment during the next  
26 session, and one man with extreme back pain attributed needling pain to his damaged nerves from a  
27 previous injury. Both of these participants concluded that the treatment went well; however they  
28 also reported, *"It was not for me."* (p4,M, acu; p7,F,acu)  
29

30 *"she'd actually hit at the root for a problem that I have with my pain, because I think at one*  
31 *time she put a needle in me and I kicked her. Without wanting to I involuntarily kicked her.*  
32 *And she'd obviously hit upon -- I think there was one time when I kicked out and more than a*  
33 *few occasions where she'd twitched a nerve that obviously."* (p4,M,acu)  
34

35  
36 In contrast, within the no-pain group two participants who were worried about the potential pain of  
37 needling prior to starting the treatment later attributed the needling sensations to the healing  
38 process. Three men thought they would have been equally relaxed if they had just rested or gone for  
39 a massage, and two other participants found the sessions too time-consuming.  
40

41 *"A little bit sceptical as to whether the treatments (acupuncture) work anyway. So it was for*  
42 *me like, if I go and get a sport massage, it was like the equivalent of that..."* (p13,M,acu)  
43

#### 44 **Factors that influenced long-term change reported by those receiving acupuncture.**

45 As treatment progressed, many participants reported that their acupuncturist began guiding them to  
46 make changes to their lifestyle in order to engender beneficial long-term outcomes. For most people  
47 with pain, fear of pain and potential injury posed a barrier to engaging in physical activity. The  
48 majority of the pain group reported being encouraged to take up gentle exercise for their overall  
49 health and they also distracted themselves during periods of low mood.  
50

51 *"The things, they seem so small, but they are important. Things like, getting out and going*  
52 *for a walk and getting some fresh air. And just opening your eyes in the mornings and trying*  
53 *to cope with life."* (p7,F,acu)  
54

55 *"He started about exercise, you know, how that can make you feel more up..."* (p8,F, acu)  
56  
57  
58  
59  
60

1  
2  
3 *"I read a lot and try to keep my mind off it. Really." (p9,F,acu)*

4  
5 One man developed his own technique based on how he felt during the acupuncture to help him  
6 manage low moods, whilst another relied on monthly acupuncture treatments alone to stay well;  
7 another considered further treatments but found the cost prohibitive.  
8

9  
10 *"I sort of developed this technique and I don't know, it was like... The way I was feeling*  
11 *during the acupuncture... I sort of clung on to this feeling that, or this technique of gaining*  
12 *that feeling, so I remember on a couple of occasions where I was out and about walking, and*  
13 *thinking about things that would normally would start leading me to start feeling a bit down,*  
14 *but it was like I'd been given this tool in my head and I just sort of – it just sort of went onto*  
15 *auto-pilot. It was like pulling those feelings away and just sort of throwing them*  
16 *away.... Well, it lasted for a while but it started subsiding." (p1,M,acu)*

17  
18 *"I go for acupuncture now once a month and I find that any more than a month and I can feel*  
19 *myself sort of slipping and feeling really, you know, starting to get worse again. And then I*  
20 *go and I feel much, much better..." (p3,M,acu)*

21  
22 The advice given to the no-pain comparator group was qualitatively different. Acupuncturists  
23 advised on dietary change, the reduction of caffeine and alcohol, and relaxation, which varied with  
24 the presenting symptoms and by gender. Those participants with least rapport also tended to be  
25 those who were less willing to make behavioural changes.  
26

27  
28 *"She also helped with giving me other things that I can do. Suggesting different foods for me*  
29 *to eat to make me feel more energetic.... I was cold all the time and that made me feel more*  
30 *lethargic as well, because all I wanted to do was stay in and go to bed and stay warm. So she*  
31 *was suggesting that I literally ate warmer foods, and she gave me a list of sort of Chinese*  
32 *medicine sort of foods that they had." (p20,F,acu)*

33  
34 In general, the process of change evolved in three stages. The therapeutic relationship and active  
35 engagement in recovery acted as mediators of the outcome throughout each stage of the process. In  
36 the short term, acupuncture often relieved physiological symptoms of depression and of comorbid  
37 pain. Longer-term improvement in depression was developed through the participants' active  
38 engagement in health promoting behaviours, supported by a positive therapeutic relationship.  
39 Several participants with comorbid pain had less physical ability to engage in lifestyle changes and  
40 tended to be the passive recipients of care. These participants often had fewer external resources in  
41 the form of finance and social contact to manage their depression and comorbid symptoms in the  
42 longer-term. Additional quotes are presented in Supplement 6.  
43  
44

#### 45 **Processes of change reported by those receiving counselling: positive and negative experiences**

46 Based on their previous experiences of counselling the majority of participants spoke of their low  
47 expectations of counselling. However when engaged with the counselling process within the trial,  
48 most reported being relieved to have someone to talk to in confidence. For both the pain and the  
49 no-pain groups, the process of change followed a common pathway: beginning with the participants'  
50 disclosure of personal information and being listened to.  
51

52  
53 *"I found that process to be very valuable...I found X was very much listening and*  
54 *empathising, but maybe offered interpretation a bit more than the National Health person."*  
55 *(p37,M,coun)*

1  
2  
3 For most participants this two-way active engagement appeared to nurture a therapeutic  
4 relationship between the participant and counsellor. Four male participants welcomed the  
5 opportunity to speak to a male counsellor, a choice which put them at their ease, and facilitated the  
6 process. Three others found difficulty engaging with their counsellor and attributed this problem to  
7 a personality clash. This presented an early barrier to the process of change.  
8

9  
10 *“A lot of it does depend on who the counsellor is...I'm saying probably same sex works better.  
11 They probably have a clearer understanding of the male mind... I found him particularly  
12 sympathetic and, you know, very constructive. I think that was...I was very pleased with the  
13 way it went...” (p40,M,coun)*

14  
15 *“Every single counselling cliché that you have about, oh it's parenting issues – she kind of  
16 wheeled them all out one after the other and they were already things that I'd thought  
17 about, considered and looked at and examined to the nth degree and then thought, no that's  
18 not the problem... It felt like she was reading a script almost – like a guidebook to deal with  
19 this kind of disorder...it was almost the complete opposite of what I felt like I needed.”  
20 (p28,M,coun)*

21  
22 A second stage of the process of change was often identified as occurring around midway within the  
23 course of treatment. The iterative process of participants' disclosure continued, with deeper  
24 exploration of their past, which helped to clarify the participant's understanding of themselves and  
25 their situation.  
26

27  
28 *“At the end of it, it actually for me opened up a can of worms really, and I think it did me  
29 more harm than good. A lot of my problems, especially with low self-esteem, come from the  
30 way I was brought up by my parents and my father especially. And its stuff that I'd never  
31 addressed and it brought it all out, actually. And I actually felt worse at the end of it... I don't  
32 feel so bad about it now, because I recognise why I am like I am and some of the problems I  
33 have, where they come from... Although I say they'd opened up a can of worms, and brought  
34 some upsetting experiences back... I think it was good to do that. Because those sort of  
35 things had been bottled up for many, many years... it's actually made me address them.”  
36 (p26,M,coun)*

37  
38 *“It made me realize that I just held everything in. From being a little girl, everything that had  
39 ever bothered me it was never talked about. You know, I'm quite lucky that I've never had  
40 any real abuse or anything like that. It's just that I've got memories of being a child and  
41 things were said and it hurt. And I just locked it away. And I did that for years.” (p41,F,coun)*

42  
43  
44 Several participants realized what factors triggered and perpetuated negative thoughts, some of  
45 which were unfounded. For one man with chronic pain, this meant going through a grieving process  
46 for the loss of his former way of life before setting in place new ways of thinking and coping.  
47

48  
49 *“You know, I think that was the big thing that I got from it, you know – that I could see  
50 myself more positively after having the time with him. And understand that some of the  
51 negative thoughts that were coming to my mind were not reality, if you like. To let them sail  
52 past and focus on the good things that I've done in the past.” (p38,M,coun)*

53  
54 *“Everything that defined what I was has now gone. And it took an awful lot of grief, if you  
55 like, to come round to the fact that it was worth trying again”. (p25,M,coun)*  
56  
57  
58  
59  
60

1  
2  
3 The use of metaphors was particularly useful for de-cluttering unnecessary thoughts about their  
4 past, regaining perspective, setting their problems into context, and focussing on what was  
5 important.

6 *“the discussions were much more free than I’d kind of anticipated they might have been,*  
7 *was using metaphors and analogies and stuff like that, to be able to describe things and*  
8 *move through things. And the pictures were just coming to me in my head, like. I had one*  
9 *which was sort of like a circuit board and it felt like some of the wires were not quite wired*  
10 *up properly and they weren’t working and stuff like that. And I can kind of track the*  
11 *metaphors throughout the whole process and it feels like it was much more of a – like it all*  
12 *opened up.” (p38,M,coun)*

### 14 **Factors that influenced long term change reported by those receiving counselling**

15 The final stage in the process of change was directed towards enabling the participants to maintain  
16 progress independently. Gender differences became apparent in the coping strategies adopted; the  
17 majority of women took up health and well-being strategies. Compared to the women in the pain  
18 group, the women in the no-pain comparator group were able to use a wider range of resources to  
19 cope with, and engage in social activities more easily. One woman recalls being given cognitive  
20 behavioural homework to overcome a particular anxiety.

21 *“She gave me sort of little exercises. I found it very difficult to walk down to a friend of mine.*  
22 *She lives in quite a built up area... People were sitting out in their gardens and I found it very*  
23 *intimidating. I didn’t like it. I’d become really sweaty, short of breath walking down through*  
24 *her estate to go and see her... basically she just taught me to get a grip on myself really, by*  
25 *pointing out, you know, that everything was going to be all right... short sharp steps really.*  
26 *And that I’d got the coping mechanisms and I could do it.” (p32,F,coun)*

27  
28  
29  
30  
31 Many male participants appear to have continued to practise the cognitive strategies learned within  
32 the earlier sessions, and applied them to their life outside the sessions. However, male participants  
33 with depression and comorbid pain found greater difficulty sustaining these strategies and returned  
34 to their general practitioner for further help.

35  
36 In summary, the majority of participants had had previous experience of counselling; however, their  
37 initial low expectations of success receded as the course of treatment progressed. A few counsellors  
38 practiced a more directive intervention than humanistic counselling, according to the need of the  
39 participant. The process of change comprised three stages, each mediated by the quality of the  
40 relationship and the participant’s active engagement. Additional quotes are presented in  
41 Supplement 7.

### 42 **Processes of change reported by those receiving usual care**

43  
44 Participants in all three arms received usual care throughout the trial. The process of change within  
45 usual care was less evident. Differences in the appraisal of general practitioner care were apparent:  
46 three older participants with depression and comorbid pain who were allocated to usual care alone  
47 complained of a lack of understanding and continuity of general practitioner and they felt  
48 abandoned without hope. One 89-year-old lady reported:

49  
50  
51 *“I would never go to a doctor again. I am, because I suffer a lot of pain that I needn’t have*  
52 *done if he’d been different...if he’d have listened to me instead of just pooh-poohing it off*  
53 *and saying, oh no, it’s not that. If he’d have really listened to what I was saying, he could*  
54 *have done more for me...he’s ignored what I’ve told him. Well, in fact he’s very often just*  
55 *ignored it all together. Pretended I hadn’t said it... You see, at my age you can’t really change*  
56 *doctors. There’s not many doctors want to take somebody on that’s 90 years old, do they?*

1  
2  
3 *When I'm having a really bad day... you know, and I feel I can't turn even to the doctors, you*  
4 *know, then yeah, I do get depressed."* (p51,F,uc)  
5

6 In contrast, the majority of participants who were pain free pointed to a relationship based on trust  
7 as being a component of their steady improvement over time. For most people, a regular monthly  
8 10-minute consultation was helpful and constructive. A few felt that their general practitioner had  
9 made additional time for them when they were most in need.  
10

11 *"He sees me every month. I have monthly meetings with him just to have a general chat*  
12 *about how things are... I get on fine with him. As I say, I can talk about just about anything*  
13 *with him, so I suppose in a way, he's sort of, if anything he's been maybe a counsellor for me,*  
14 *because, you know, I can sit and talk to him about stuff..."* (p58,M,uc)  
15  
16

17 All participants at some time had been prescribed antidepressant medication. The majority of  
18 participants on long-term antidepressant medication raised concerns about the side effects;  
19 participants in the pain group were particularly concerned about the potential effects of mixing  
20 medication for their other medical problems with their antidepressants. A few acknowledged that  
21 they needed antidepressants to maintain long-term stability.  
22

23 *"Staying on medication, it has transformed my life and made everybody else's life around me*  
24 *better as well. And I wish I'd have done it sooner... It must be four or five years now and yes,*  
25 *it's been life transforming... When I started on my medication and I could realize the*  
26 *difference – the two people I was, almost."* (p7,F,acu)  
27  
28

29 In addition to medication, during the period of the trial general practitioners referred participants to  
30 a range of secondary services: two young women received three sessions with a mental health link  
31 worker, an intervention which had enabled them regain control of their lives; three others had been  
32 advised to try online cognitive behavioural therapy which two found to be easily accessible and  
33 effective; one man at risk of suicide was referred for urgent psychiatric help.  
34

35 *"I was referred rapidly to A&E and was assessed by X the psychiatrist. And I was put on to*  
36 *intensive home treatment. Which was invaluable. As a condition of not being sectioned..."*  
37 *(p59,M,uc)*  
38

39 Referrals for younger patients had been beneficial although the waiting times were long and not  
40 always found to be acceptable, leaving most patients without adequate support in a time of crisis,  
41 and without sufficient money to pay for private care.  
42

43 *"I go to the doctors and I have to wait a matter of I don't know how many months before I*  
44 *can get, you know, onto the counselling and you know, it's just like the moment's gone, sort*  
45 *of thing... Unfortunately that can cost a lot of money – I'm on benefit. I can't afford it...I*  
46 *don't hold out much hope."* (p50,F,uc)  
47  
48

#### 49 **Factors that influenced long term change reported by those receiving usual care: positive and** 50 **negative experiences**

51 For those who received help via a referral, the advice followed a familiar pattern: to engage in  
52 lifestyle changes, to add structure to the daily routine, and to use distraction to reduce the focus on  
53 the symptoms and negative feelings. However, without support the stoicism of 'forcing myself' was a  
54 prominent default strategy among most usual care participants.  
55

56 *"I force myself to do things and then I generally feel better"* (p57,F,uc)  
57  
58  
59  
60



1  
2  
3  
4 *"It's forcing myself. Well, it's a survival strategy..."(p59,M,uc)*  
5

6 Overall, the continuity of always seeing the same general practitioner was reported to be important  
7 and beneficial. By contrast, some older participants with depression and comorbid pain remained  
8 caught in a seemingly hopeless cycle of seeking diagnosis and treatment for a physical complaint and  
9 without resources to seek private health care services. Most patients who received acupuncture or  
10 counselling were also happy with the attention from their general practitioner, but had welcomed  
11 the additional treatment provided within the trial as an adjunct to their usual care. Supplement 8  
12 presents a number of representative quotes.  
13

## 14 **DISCUSSION**

### 15 **Principal findings**

16 The participants' experiences of depression were a complex interplay of internal and contextual  
17 factors. Compared to participants with depression alone, participants with depression and comorbid  
18 pain had fewer internal and external resources available to effectively manage their depression in  
19 the longer-term. Acupuncture and counselling treatments were individualised interventions that  
20 operated from different perspectives. Acupuncturists appeared to work from a more physical  
21 perspective to directly relieve the symptoms of depression as they presented and then helped the  
22 patient engage in health behaviours that had a positive influence on long-term change. In contrast,  
23 counsellors helped guide the patient to identify and confront underlying causes of depression and  
24 then find their own way forward. Usual care relied primarily on pharmacological interventions.  
25 Processes of change comprising three stages were identified within acupuncture and counselling,  
26 each with specific active components. For both interventions, participants reported that the  
27 establishment of a therapeutic relationship and their active engagement helped them develop  
28 coping strategies that in turn helped them be more effective in reducing their depression in the  
29 longer-term. Gender differences were apparent; the majority of women utilised a wide range of  
30 health behaviours, distraction and social contact, whilst men relied predominantly on cognitive  
31 strategies to manage unhelpful negative thought processes.  
32  
33  
34

### 35 **Strengths and Limitations**

36 Qualitative analysis of participants' reports of acupuncture and counselling compared with usual  
37 care provided within a randomised controlled trial is novel. This study was nested within a 12-month  
38 randomised controlled trial of the effectiveness of acupuncture or counselling for depression  
39 compared to usual care. The 52 telephone interviews were obtained from a wide range of  
40 participants in socially diverse settings. The interviews provided rich data on the participants'  
41 experiences of depression and the treatment received in the trial. The thematic analysis was  
42 conducted using a bottom-up process to allow the themes to develop directly from the participants'  
43 own words. We have presented the positive and negative experiences of each form of treatment,  
44 whether treatment was beneficial or not, and we are able to enrich the quantitative results of  
45 effectiveness of the treatments offered with the qualitative data.  
46  
47

48 These qualitative findings are concordant with, and supplement the quantitative data[19] from the  
49 ACUDep trial which showed that participants with moderate to extreme pain at baseline had worse  
50 outcomes at three months for depression than the no-pain comparator group in all three treatment  
51 arms. Our findings extend the findings of the trial's quantitative data in two ways: firstly, they offer  
52 insight into how pain and disability may erode the internal resources available for the effective  
53 management of depression. Moreover, these limitations compromise the person's security by  
54 reducing ability to generate external resources such as financial income and social contact. Secondly,  
55 based directly on participants' accounts, our findings identify mechanisms within the processes of  
56  
57  
58  
59  
60



1  
2  
3 change that are specific to acupuncture and counselling that facilitate reduction in the symptoms of  
4 depression.

5  
6 Our study has some limitations. Participants may have attributed changes directly to treatment  
7 rather than concurrent, coincidental contextual changes. To capture the participants' experience in  
8 the longer-term the interviews were conducted after the participants completed their twelve-month  
9 follow up questionnaire. We accept there is a possibility of recall bias as it has long been known that  
10 there is a significant, stable association between depression and memory impairment[24] which may  
11 have altered what was recalled and how it was recalled. This lack of recall is reflected in the brevity  
12 of some of the interviews. Although all the research questions in the topic guide were covered in the  
13 interviews, the poor recall of some experiences did not permit a lengthy exploration. However, our  
14 aim was to learn more of the experiences of depression and treatment in the longer-term and it is  
15 likely that the participants recalled the aspects of treatment that were most salient to them. The lack  
16 of face-to face-contact during the telephone interviews prevented the interviewer gathering non-  
17 verbal contextual information such as social cues, body language, appearance, and setting to  
18 supplement the verbal answers of the interviewees. A face-to-face interview may have resulted in  
19 slightly longer interview; nevertheless, a recorded telephone interview was convenient and might be  
20 considered to be more acceptable to participants in terms of time and anonymity.  
21  
22

### 23 **Comparison to other studies**

24 That depression in the presence of pain is associated with a poorer response to treatment for the  
25 depression corresponds with previous studies of depression and pain comorbidity.[2][7] Patients  
26 with depression and comorbid pain tend to exhibit a cognitive bias specific to negative aspects of  
27 health and are more likely to report less favourable outcomes of treatment.[25][26] Many of the  
28 pain group participants had a musculoskeletal problem alongside their depression, and complained  
29 of fatigue and sleep disturbances. This cluster of symptoms has also been identified in 36% of older  
30 people suffering from osteoarthritis of the hip and knee.[27]  
31  
32

33 The characterisation of depression as a cycle of pain, fatigue and withdrawal that impacts on daily  
34 functioning and social activities is consistent with evidence showing that these factors create an  
35 enduring cycle of depression.[6][28] The cyclical nature of pain problems are known to activate  
36 catastrophic worry and accentuate the symptoms of depression; coping strategies such as relaxation  
37 and distraction techniques are a good way of regulating emotions if the pain is not too intense.[5]  
38 Older people with chronic pain and depression were identified in this study as the least satisfied with  
39 their primary care service, a finding which echoes earlier findings where patients with multiple  
40 physical complaints and depression posed a greater clinical burden[2][7] and were perceived as  
41 'difficult' by general practitioners.[1]  
42  
43

44 With regards to the mechanisms of change, our findings identify three clear stages within  
45 acupuncture and counselling. The establishment of the therapeutic alliance in the early stages is an  
46 essential component from the outset of treatment. This extends the findings from within a  
47 pragmatic trial of acupuncture for back pain[29][30] and supports an earlier model of the process  
48 and mechanisms that contribute to ongoing change in counselling developed from the user  
49 perspective.[31] Historically, the therapeutic alliance has been regarded pejoratively as a placebo  
50 'feel good factor' based on the grounds that most individuals seek positive feedback to reinforce  
51 their own behaviour.[32] However, where this argument focuses on 'visiting' a therapist for advice  
52 and help, it misses the point that the intervention-specific advice and positive reinforcement used in  
53 conjunction with the participant's active engagement in their rehabilitation will activate beneficial  
54 behavioural change.[8] An earlier study found that some participants had difficulty putting self-care  
55 advice into practice, even when they were intellectually committed and suggests that practitioners  
56 may need to follow up more carefully on the advice they have given.[33]  
57  
58  
59  
60

### Implications for practice and future research

Previous work has advocated that the management of depression and comorbid pain should involve the treatment of both physical and psychological components together, and the treatments should be customised and directed to addressing comorbidities.[34] Psychiatrists and general practitioners often feel ill-equipped to adequately manage the complex presentation of symptoms associated with depression and comorbid pain. A shift in care is required from the current focus on the medical aspects of physical health to an all-encompassing approach that takes into account the bio-psychosocial effects of depression and comorbid pain.[35] Future research should investigate the effectiveness of using a sequential strategy of acupuncture for early relief of symptoms, especially where there are physical symptoms, followed by counselling to address deeper psychological issues and develop cognitive coping strategies to break out of the cycle of depression. In the meantime, for those who have both depression and physical symptoms, our evidence suggests that acupuncture could be a useful initial referral option.

### CONCLUSION

Differences in the way depression is experienced by people with depression and comorbid pain impact on the participant's engagement with treatment and on the response to treatment for depression. The processes of acupuncture and counselling had specific identifiable effects that were beneficial to the majority of participants. The therapeutic relationship and participants' active engagement in recovery may play distinct roles in driving long-term management of depression and comorbid pain. This study has implications for policy makers and providers of care for primary care patients with depression and comorbid pain. Providers of care may wish to consider a short course of acupuncture to relieve symptoms of depression in patients who present with depression and comorbid pain, prior to a referral for counselling if needed.

### Legend Supplement 3.

#### Diagram showing the participants' experiences of depression and treatment.

Numbers indicate participants reporting; Bold = participants with chronic pain; <sup>D</sup> = disabled

### Acknowledgements

We acknowledge the contribution of the patients, counsellors, acupuncturists and general medical practitioners; the ACUDep trial management team; and Anne Burton for transcription services.

### Contributors

Ann Hopton (MSc) is a research fellow from a nursing background whose research focuses on the non-pharmacological management of chronic pain and depression. Ann Hopton conducted the interviews and analysis, interpreted the data, drafted and revised the article.

Dr Janet Eldred is a qualitative researcher and research administrator whose interests are based on feminist theology and older peoples' lives. Janet Eldred assisted with coding, advised on analysis and gave final approval for publication.

Dr Hugh MacPherson is a practising acupuncturist and senior research fellow specialising in the effectiveness, cost-effectiveness, mechanisms and safety in the evaluation of complementary medicine. Hugh MacPherson revised critically important intellectual content and gave final approval for publication.

### Ethics

Ethical approval was obtained from the York NHS Research Ethics Committee (09/H1311/75).

**Funding**

Funding: This article presents independent research funded by the National Institute for Health Research (NIHR) under its Programme Grants for Applied Research Programme (RP-PG-0707-10186). The views expressed are those of the author(s) and not necessarily those of the National Health Service, the NIHR or the Department of Health. The funders, and the University of York in its role as sponsor for the study, had no role in study design, data collection and analysis, decision to publish, or preparation of the manuscript.

**Data sharing**

There are no additional unpublished data pertaining to this study

**REFERENCES**

- 1 Katona C, Peveler R, Dowrick C, *et al.* Pain symptoms in depression: definition and clinical significance. *Clinical Medicine* 2005;**5**:390–5. doi:10.7861/clinmedicine.5-4-390
- 2 Arnow BA. Comorbid Depression, Chronic Pain, and Disability in Primary Care. *Psychosomatic Medicine* 2006;**68**:262–8. doi:10.1097/01.psy.0000204851.15499.fc
- 3 Bair MJ RR. Depression and pain comorbidity: A literature review. *ArchInternMed* 2003;**163**:2433–45.
- 4 Kroenke K, Wu J, Bair MJ, *et al.* Reciprocal Relationship Between Pain and Depression: A 12-Month Longitudinal Analysis in Primary Care. *The Journal of Pain* 2011;**12**:964–73. doi:10.1016/j.jpain.2011.03.003
- 5 Linton SJ, Nicholas MK, MacDonald S, *et al.* The role of depression and catastrophizing in musculoskeletal pain. *European Journal of Pain* 2011;**15**:416–22.
- 6 Tylee A, Gandhi P. The Importance of Somatic Symptoms in Depression in Primary Care. *Prim Care Companion J Clin Psychiatry* 2005;**7**:167–76.
- 7 Kroenke K, Shen J, Oxman TE, *et al.* Impact of pain on the outcomes of depression treatment: Results from the RESPECT trial. *Pain* 2008;**134**:209–15. doi:10.1016/j.pain.2007.09.021
- 8 Bair MJ, Matthias MS, Nyland KA, *et al.* Barriers and Facilitators to Chronic Pain Self-Management: A Qualitative Study of Primary Care Patients with Comorbid Musculoskeletal Pain and Depression. *Pain Medicine* 2009;**10**:1280–90.
- 9 Gensichen J, Guethlin C, Sarmand N, *et al.* Patients' perspectives on depression case management in general practice – A qualitative study. *Patient Education and Counseling* 2012;**86**:114–9. doi:10.1016/j.pec.2011.02.020
- 10 Kadam UT, Croft P, McLeod J, *et al.* A qualitative study of patients' views on anxiety and depression. *Br J Gen Pract* 2001;**51**:375–80.
- 11 Vickers AJ, Cronin AM, Maschino AC, *et al.* Acupuncture for Chronic Pain: Individual Patient Data Meta-analysis. *ArchInternMed* 2012;**172**:1–10.
- 12 Lam M, Curry P. Effectiveness of Acupuncture for Nonspecific Chronic Low Back Pain: A Systematic Review and Meta-analysis. *Spine* 2013;**38**:2124–38. doi:10.1097/01.brs.0000435025.65564.b7

- 1  
2  
3 13 Hopton AK, Curnoe S, Kanaan M, *et al.* Acupuncture in practice: mapping the providers, the  
4 patients and the settings in a national cross-sectional survey. *BMJ Open*  
5 2012;**2**.<http://bmjopen.bmj.com/content/2/1/e000456.abstract>  
6  
7 14 Smith CA, Hay PP. Acupuncture for depression. *CochraneDatabaseSystRev* 2005:CD004046.  
8  
9 15 Van Schaik DJF, Klijn AFJ, Van Hout HPJ, *et al.* Patients' preferences in the treatment of  
10 depressive disorder in primary care. *General Hospital Psychiatry* 2004;**26**:184–9.  
11 doi:10.1016/j.genhosppsych.2003.12.001  
12  
13 16 Bower P, Knowles S, Coventry PA, *et al.* Counselling for mental health and psychosocial  
14 problems in primary care. *CochraneDatabaseSystRev* 2011:CD001025.  
15  
16 17 Barnes D, Hall J, Evans R. Survey of the Current Provision of Psychological Therapy Services in  
17 Primary Care in the UK. Artemis Trust 2008.  
18 [http://www.bacp.co.uk/admin/structure/files/pdf/2440\\_pl\\_438\\_artemis\\_report\\_web\\_small.pdf](http://www.bacp.co.uk/admin/structure/files/pdf/2440_pl_438_artemis_report_web_small.pdf)  
19 (accessed 10 Feb2014).  
20  
21 18 MacPherson H, Richmond S, Bland M, *et al.* Acupuncture and Counselling for Depression in  
22 Primary Care: A Randomised Controlled Trial. *PLoS Medicine* 2013;**10**:e1001518.  
23 doi:10.1371/journal.pmed.1001518  
24  
25 19 Hopton A, MacPherson H, Keding A, *et al.* Acupuncture, counselling or usual care for depression  
26 and comorbid pain: secondary analysis of a randomised controlled trial. *BMJ Open*  
27 2014;**4**:e004964–e004964. doi:10.1136/bmjopen-2014-004964  
28  
29 20 Charmaz K. *Constructing Grounded Theory: A practical guide through qualitative analysis*.  
30 London: : Sage 2006.  
31  
32 21 MacPherson H, Schroer S. Acupuncture as a complex intervention for depression: a consensus  
33 method to develop a standardised treatment protocol for a randomised controlled trial.  
34 *Complement TherMed* 2007;**15**:92–100.  
35  
36 22 MacPherson H, Richmond S, Bland MJ, *et al.* Acupuncture, Counseling, and Usual care for  
37 Depression (ACUDep): study protocol for a randomized controlled trial. *Trials* 2012;**13**:209.  
38  
39 23 Braun V, Clarke V. Using thematic analysis in psychology. *Qualitative Research in Psychology*  
40 2006;**3**:77–101.  
41  
42 24 Burt DB, Zembar MJ, Niederehe G. Depression and memory impairment: A meta-analysis of the  
43 association, its pattern, and specificity. *Psychological Bulletin* 1995;**117**:285–305.  
44 doi:10.1037/0033-2909.117.2.285  
45  
46 25 Pincus T, Santos R, Morley S. Depressed cognitions in chronic pain patients are focused on  
47 health: Evidence from a sentence completion task. *Pain* 2007;**130**:84–92.  
48 doi:10.1016/j.pain.2006.10.031  
49  
50 26 Rusu AC, Pincus T, Morley S. Depressed pain patients differ from other depressed groups:  
51 Examination of cognitive content in a sentence completion task. *PAIN* 2012;**153**:1898–904.  
52 doi:10.1016/j.pain.2012.05.034  
53  
54  
55  
56  
57  
58  
59  
60

- 1  
2  
3 27 Murphy SL, Lyden AK, Phillips K, *et al.* Subgroups of older adults with osteoarthritis based upon  
4 differing comorbid symptom presentations and potential underlying pain mechanisms. *Arthritis*  
5 *Research & Therapy* 2011;**13**:R135. doi:10.1186/ar3449  
6  
7 28 Alderson SL, Foy R, Glidewell L, *et al.* How patients understand depression associated with  
8 chronic physical disease – a systematic review. *BMC Family Practice* 2012;**13**:41.  
9 doi:10.1186/1471-2296-13-41  
10  
11 29 MacPherson H, Thomas K. Self-help advice as a process integral to traditional acupuncture care:  
12 implications for trial design. *Complement TherMed* 2008;**16**:101–6.  
13  
14 30 Hopton A, Thomas K, MacPherson H. The Acceptability of Acupuncture for Low Back Pain: A  
15 Qualitative Study of Patient’s Experiences Nested within a Randomised Controlled Trial. *PLoS*  
16 *ONE* 2013;**8**:e56806. doi:10.1371/journal.pone.0056806  
17  
18 31 Perren S, Godfrey M, Rowland N. The long-term effects of counselling: The process and  
19 mechanisms that contribute to ongoing change from a user perspective. *Counselling and*  
20 *Psychotherapy Research* 2009;**9**:241–9. doi:10.1080/14733140903150745  
21  
22 32 Wall M, Wheeler S. Benefits of the placebo effect in the therapeutic relationship.  
23 *Complementary Therapies in Nursing and Midwifery* 1996;**2**:160–3. doi:10.1016/S1353-  
24 6117(96)80050-3  
25  
26 33 Evans M, Paterson C, Wye L, *et al.* Lifestyle and Self-Care Advice Within Traditional Acupuncture  
27 Consultations: A Qualitative Observational Study Nested in a Co-Operative Inquiry. *The Journal*  
28 *of Alternative and Complementary Medicine* 2011;**17**:519–29. doi:10.1089/acm.2010.0749  
29  
30 34 Lavigne GJ, Nashed A, Manzini C, *et al.* Does Sleep Differ Among Patients with Common  
31 Musculoskeletal Pain Disorders? *Current Rheumatology Reports* 2011;**13**:535–42.  
32 doi:10.1007/s11926-011-0209-3  
33  
34 35 National Collaborating Centre for Mental Health. CG91: Depression in adults with a chronic  
35 physical health problem: Treatment and management. British Psychological Society & the Royal  
36 College of Physicians 2010. <http://www.nice.org.uk/CG91>  
37  
38  
39  
40  
41  
42  
43  
44  
45  
46  
47  
48  
49  
50  
51  
52  
53  
54  
55  
56  
57  
58  
59  
60

Supplement 1.

Sampling frame of the participants interviewed:

NB. Declined =4; No response=3

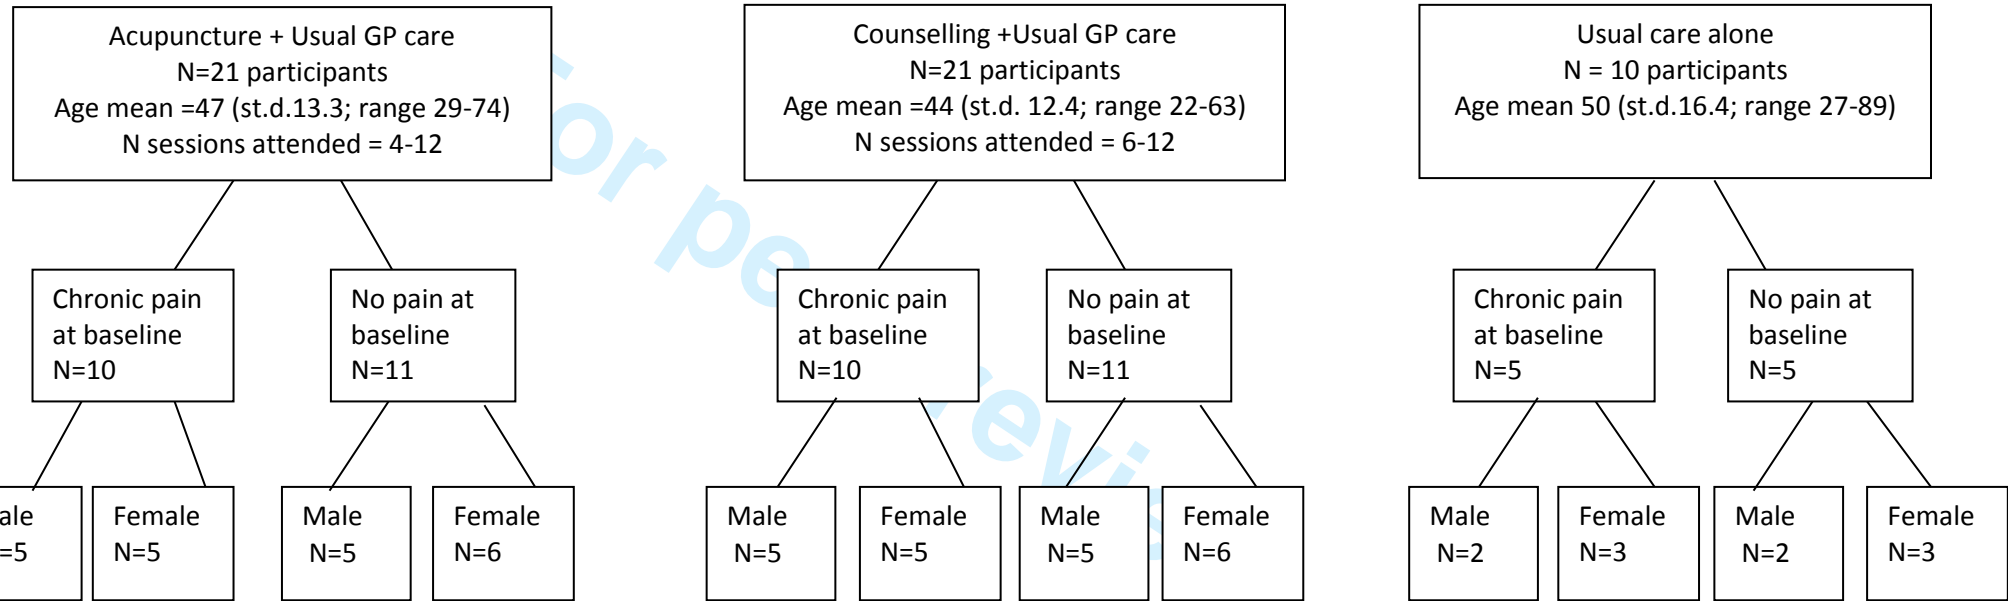



## Supplement 2: Topic Guide for in-depth interviews

1. Background information:
  - a) sociological profile: age gender
  - b) social support: family, friends, colleagues, carers
  - c) activities: physical exercise - outdoors-indoors, leisure activities, activities that expressly involve aesthetics, resting
  - d) interests: hobbies, dreams, imagination, future plans
  - e) food: diet, cooking, eating out
2. Personal experience of depression, co-morbidity
3. Previous experience with health services and treatments for depression
4. Experience and perceptions of the actual treatment (acupuncture, counselling and usual care) received within the trial
5. Perceived outcomes of treatment
6. Personal beliefs about the effectiveness of different types of treatments
7. Personal preferences for different types of treatments

### Research Question 1)

**To what extent is pain also present with depression, and how has the depression (and pain if present), changed over time as a response to receiving a course of acupuncture or counselling?**

- 1) Could you tell me a little bit about yourself and about things you like to do, or hope to do.  
Prompt
  - How has your depression affected your life over the past few months/years?
- 2) Could you tell me about your experience of the treatment you received for depression during the trial?  
Prompt
  - It's been 12 months since your treatment started, what changes have you noticed during that time

1  
2  
3  
4  
5  
6  
7  
8 **Research Question 2)**  
9

10 **What aspects of the treatment influenced long term change?**  
11

- 12
- 13 1) Has the treatment helped you understand/learn more about your depression?  
14 Prompt
- 15 • Are there things you can do that will help to manage it?  
16
- 17
- 18 2) What was it about the treatment that helped you understand or learn more about  
19 depression? And your pain?  
20 Prompts
- 21 • Have you learned anything about how to manage your depression or pain? (If so, what?)
  - 22 • Have you adopted any different ways of coping with your depression or pain?  
23
- 24
- 25 3) Has your understanding of yourself changed in any way during the trial?  
26 Prompt
- 27 • How do you feel about yourself now compared to before?  
28  
29  
30

31 **Research Question 3)**  
32

33 **How satisfied are you with the treatment received?**  
34

35 Prompts

- 36 • How did the treatment you received on the trial compare to treatment you have had  
37 before? e.g. GP, mental health service, private, other...?  
38
- 39 • What aspect of the treatment did you like/dislike /gave you concern and why?  
40
  - 41 • Do you think the other treatments would be more or less effective  
42  
43  
44  
45  
46  
47  
48  
49  
50  
51  
52  
53  
54  
55  
56  
57  
58  
59  
60

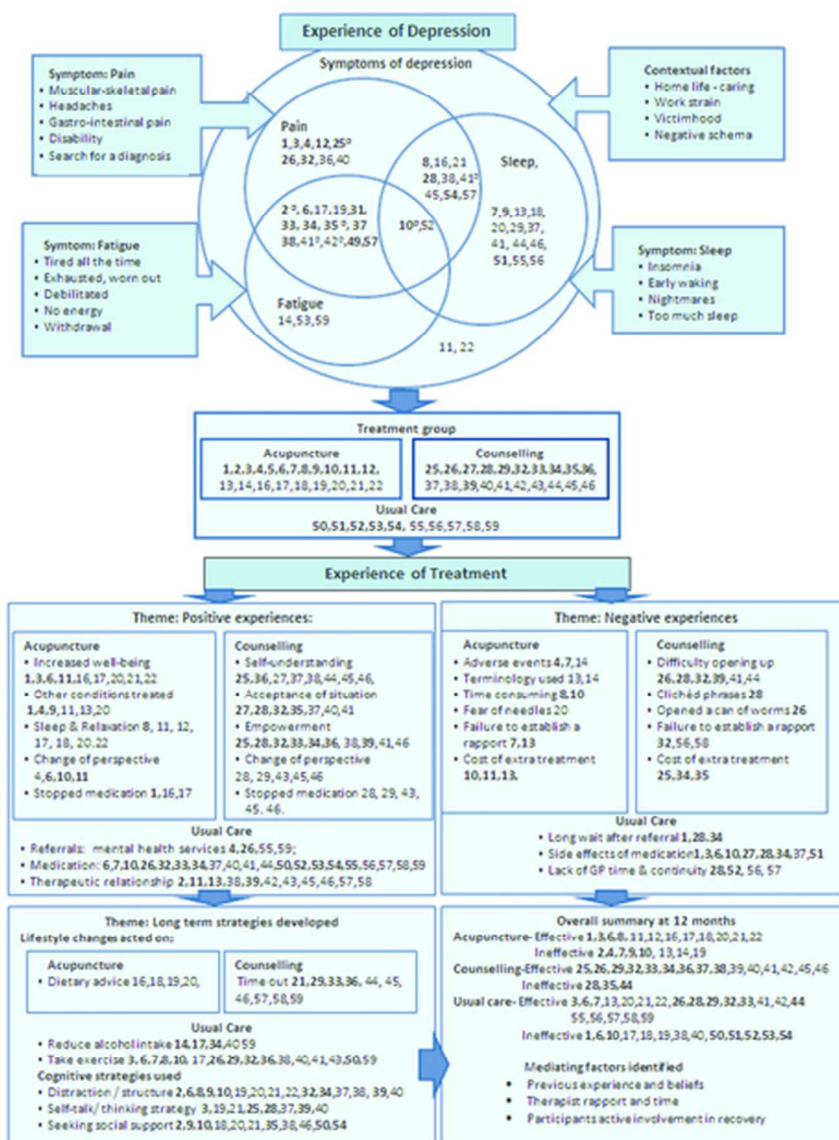

Legend Supplement 3.  
 Diagram showing the participants' experiences of depression and treatment.  
 Numbers indicate participants reporting; Bold = participants with chronic pain; D = disabled

20x27mm (600 x 600 DPI)

| <b>Supplement 4. Symptoms of depression</b>                                                                                                                                                                                                                                                                                                                                                                                                                                                                                                                                                                                                                                                                                                                                                                                                                                                                                                                                                                              |
|--------------------------------------------------------------------------------------------------------------------------------------------------------------------------------------------------------------------------------------------------------------------------------------------------------------------------------------------------------------------------------------------------------------------------------------------------------------------------------------------------------------------------------------------------------------------------------------------------------------------------------------------------------------------------------------------------------------------------------------------------------------------------------------------------------------------------------------------------------------------------------------------------------------------------------------------------------------------------------------------------------------------------|
| "When I'm feeling really, really quite down, I find it difficult to actually get on with people. I'm very, very on the - I don't know whether the offensive, would be the right word, in the sense that I tend to read into things too much. Or take things far too literally...And obviously the defences go out there as well, so yeah. I do things without actually realising that in the sense that I might actually snap at people. So my behaviour does change." (p1,M,acu)                                                                                                                                                                                                                                                                                                                                                                                                                                                                                                                                        |
| "I don't want to do things, you know. I almost, I struggle to sort of do things to motivate myself to get work done, or you know, go out and do something. And I tend to sort of stop at home and make excuses to go out really, and that's generally how it happens..." (p3,M,acu)                                                                                                                                                                                                                                                                                                                                                                                                                                                                                                                                                                                                                                                                                                                                      |
| "I do get an awful lot of headaches, which I've attributed to the side issues... I have suffered from headaches all my life... Since I had cancer... my migraines have become 10, 20, 30 times worse. And my headaches are 100 times worse... It's entirely possible...that it's linked to that (depression). But I couldn't just say for certain. I get terrible tension headaches, and I get bucket loads of back pain. It's a constant feature in my life, you know. Sadly it's probably what I would just term the norm these days." (p12,M,acu)                                                                                                                                                                                                                                                                                                                                                                                                                                                                     |
| "Very fitful. Sometimes - it seems to be on a cycle and I keep saying I'm going to write this cycle down. Where I can't get to sleep. It's once every so often.... Sometimes it's terrible getting to sleep. And then I start thinking, which isn't helpful." (p8,F,acu)                                                                                                                                                                                                                                                                                                                                                                                                                                                                                                                                                                                                                                                                                                                                                 |
| "Some days I just think I don't want to go out that door. I don't want to talk to anybody.... I get a lot of fatigue anyway, so I'm tired and I haven't got the energy to think some days." (p10,F,acu)                                                                                                                                                                                                                                                                                                                                                                                                                                                                                                                                                                                                                                                                                                                                                                                                                  |
| "Everything around me was just black and negative... I would never allow myself go near that again." (p13,M,acu)                                                                                                                                                                                                                                                                                                                                                                                                                                                                                                                                                                                                                                                                                                                                                                                                                                                                                                         |
| "I feel as if I've got a real heavy head, as if - not a headache as in a really painful headache, but it's just like I could just go and sit in a dark room and shut away for a time, to clear my head. It's just like it's a heavy feeling" (p21,F,acu)                                                                                                                                                                                                                                                                                                                                                                                                                                                                                                                                                                                                                                                                                                                                                                 |
| "I also had a bowel disease called diverticulitis, and I had an operation and part of my bowel removed 2 years ago and that's caused me problems obviously before then and since then, because they've now found that I've still got it but in another part of the bowel... I've had IBS for many years, about 15 years. And obviously when I get down and depressed, that really kicks in and the diverticular disease I've had pain all the time from that and that tends to be managed by sort of diet and medication... the likelihood is I'd end up with a colostomy, which I don't want. I'm trying to sort of manage the disease without having another operation... My IBS is certainly related to depression yeah.... When I was looking after the old dears, as I call them, I was offered an operation twice and I turned it down because I didn't want to be, you know, incapacitated and not able to look after them. Once they passed on, I was then able to address my own health problems." (p26,M,coun) |
| I find that depends on my state of mind. How the day has been. If I'm feeling kind of happy and content with everything, then usually I get a full night's sleep. And if not, then it'll be up every couple of hours, just waking up for no apparent reason whatsoever..." (p28,M,coun)                                                                                                                                                                                                                                                                                                                                                                                                                                                                                                                                                                                                                                                                                                                                  |
| "Everything's such an effort... At one point I didn't even get out of bed. I didn't even want to get out of bed. I'd sort the children out and then I'd just go back to bed because it just hurt so much.... before I received treatment and before I was diagnosed with post-traumatic stress, you know, you'd get them off to school and I'd just left work at that point, and I would go back to bed and do nothing..." (p32,F,coun)                                                                                                                                                                                                                                                                                                                                                                                                                                                                                                                                                                                  |
| "at the time when things were bad I would get a lot of stomach, sort of indigestion type pain. But that was at the time when we were really sort of dealing with the sort of intensity of it..."(p38,M,coun)                                                                                                                                                                                                                                                                                                                                                                                                                                                                                                                                                                                                                                                                                                                                                                                                             |
| "the times when I don't feel good, my usual pattern would be to wake up like 4.00 am, something like that... well some nights having trouble getting to sleep, but more waking up and then not being able to get back to sleep" (p44,F,coun)                                                                                                                                                                                                                                                                                                                                                                                                                                                                                                                                                                                                                                                                                                                                                                             |
| "I'd lost so much weight as well. I've never been an overweight person, but I've always kind of fluctuated between a 10 and a 12. But the amount of weight that I had lost, just in the sort of like 2 or 3 months, was really drastic, you know, the clothes were hanging off and I looked very gaunt in my face."(p46,F,coun)                                                                                                                                                                                                                                                                                                                                                                                                                                                                                                                                                                                                                                                                                          |
| "I didn't want - there were days when I just didn't want to go out of the house.... I was just constantly tired... there were days where I would get my little girl off to school and then come home and go to bed, and do very little before I had to go and pick her up." (p50,F,uc)                                                                                                                                                                                                                                                                                                                                                                                                                                                                                                                                                                                                                                                                                                                                   |
| "If things aren't going too well generally here, then the arthritis seems worse. But whether that is psychosomatic or not I don't know I really don't know. ... one of the things I did say to the psychologist, and as bonkers as that sounds is, it's almost like the arthritis is punishing me for something I've done wrong." (p52,F,uc)                                                                                                                                                                                                                                                                                                                                                                                                                                                                                                                                                                                                                                                                             |
| "I have got a lot of nightmares actually, that tend to wake me up... about three o' clock, something like that. It's a bit better now, but it did take me a long while to get back off to sleep. It wasn't as if I woke up and nodded back off again. I could be awake for a good hour... just wanted to turn my head off."(p57,F,uc)                                                                                                                                                                                                                                                                                                                                                                                                                                                                                                                                                                                                                                                                                    |
| "it's stopped me doing things I used to enjoy doing. I'm not - it's made me tired a lot of the time. Agitated, grumpy, short-tempered... I used to do a lot of reading, which I hardly do any reading now. I used to go out on bike rides and I don't do that anymore. I used to go swimming; I stopped doing that... I get tired a lot." (p58,M,uc)                                                                                                                                                                                                                                                                                                                                                                                                                                                                                                                                                                                                                                                                     |

**Supplement 5. Contextual factors**

"I can't cope with bullying at all. I seemed to always get picked on. And I'd just end up getting depressed... Well it always seemed to be a friend, they'd pick on you. You know, they'd always make you feel a fool and – it wasn't actually bullying like thumping bullying. Just make you feel out of it... And it always seemed to have happened. So I sort of won't get close to anybody anymore." (p6,F,acu)

"My first husband died. My father died. And then everything's my fault then, you see. And I'm the one in the family that, if anything goes wrong, everybody comes to me."(p8,Facu)

"I've always had a tendency to go into waves of depression throughout my life.... It's a periodic thing. It comes and it's very difficult to know why it comes. But when it comes you really hit the trough and you go down and it's very hard to pick yourself up... It makes me extremely moody. It makes me extremely irritable. It makes me not enjoy anything about me. She (mother) was in and out of many mental institutions. And it created a great deal of difficulty within my life... It did affect me and made me very introverted."(p12,M,acu)

"I'd got myself tied up into...over-valuing myself in relation to work.. I just started increasingly shutting people out that would try to get close to me. And I think that's probably because deep down I was fundamentally insecure and my kind of work outlet was my bit of success that was under my control... I'd just lost sight of things that were important." (p13,M,acu)

"I felt I aimed too high and then I didn't sort of reach what I aimed to do. So I beat myself up a bit about it."(p20,F,acu)

"It's predominantly an anxiety disorder and I think that then triggered the depression. It varies for no apparent reason whatsoever. It can be quite kind of crippling social anxiety sometimes and at other times it can be a kind of general waiting for something to go wrong; the kind of belief that there's always going to be something that's going to go wrong. And it just gets worse and worse and worse and I think it went on for such a long time that it just became how things are. That was just how my life was. Just waiting for something else to go wrong and being petrified of everything." (p28,M,coun)

"I've been unemployed since November. I was employed. I left my work to look after my brother, who was poorly. And he died in November. Well I was hoping I was going to be a full-time carer for a lot longer than what it was, but it was only a matter of a few weeks, really."(p29,M,coun)

"I'm too sensitive. I believe what people say. I'm very affected by what people think about me... whether it's where we live, or the close knit community that there is here, I still feel that we're outsiders... Whether it's we give off this aura that we don't belong or because we don't do things the way they should be done around here, I don't know. But we're still not part of anything. And we've been here 8 years. It's strange... I don't know why, apart from the fact I wasn't born here."(p35,F,coun)

"I'm doing very well... But I struggle sometimes with the workload and controlling my emotions and things... Generally when I'm working, I'm a lot better. Because I like to be on the go, I like to be doing things, I like to be learning things. But I struggle though, because I'm dyslexic, and academic stuff really stresses me out. I think that's probably why I've been getting worse over the last month, because my deadline for my portfolio is tomorrow. And I know I'm worked up about that. And I've got an exam in May that I'm worked up about... at the moment I'm actually just purely overloaded."(p43,F,coun)

"I have had a job that's been pretty full on since December which has just finished. So all my energies went into that really. Which isn't healthy, I know, but I wanted to make a good job of the job, if you know what I mean."(p44,F,coun)

"I've lost a lot of confidence since I had the stroke and I'm a bit wary about going out in case it happens again and no-one's around, you know. I've lost all my confidence, really." (p51,F,uc)

"I've needed help for a long time really, but... I'm finding it really hard to deal with, you know. Letters arrive and I daren't answer letters and a lot of the times when the phone rings, I don't really want to answer the phone because, you know, there's somebody chasing me for money or threatening me with legal proceedings, or..."(p54,M,uc)

"I didn't sleep. I was very stressed and then I'd crash out as well. So I didn't sleep, I'd work really hard. I'd study really hard and then I'd crash.... I do set myself a high standard. But then I work to that standard but I don't push myself excessively to the point of collapse." (p55,F,uc)

"The way that it – the most debilitating manifestation for me I found myself spending the last three months living in one room in the house. And not going out. Escaping the world really...I had been depressed before and I kind of knew what I was getting myself into. And really just wanted to escape from there, but by the time I'd fully got myself round to wanting to tackle – it just slipped too far too quick and I couldn't actually cope on my own anymore."(p56,F,uc)

"About caring for ill spouse) it's stopped me doing things I used to enjoy doing. I'm not – it's made me tired a lot of the time. Agitated, grumpy, short-tempered. I used to do a lot of reading, which I hardly do any reading now. I used to go out on bike rides and I don't do that anymore. I used to go swimming; I stopped doing that. I get tired a lot.... I go to bed at night but a lot of the time I'm not asleep before 12 and I'm usually awake about six...I've been known to sit down in an afternoon, and I've been asleep for an hour." (p58,M,uc)

**Supplement 6. Experience of acupuncture treatment**

"Well, you're relaxing anyway, in as much as you're just lying there. ... You're talking to him and you're passing the time of day and you're relaxing while he's doing it... I didn't feel any different at all....You're lying down and my ankles, elbows, and things like that and I didn't see what he was actually doing. And I'm just lying there passing the time of day, if you like. And at the end of it, I must admit, I didn't feel any different whatsoever.... There was nothing there that was to dislike. As I say, it was just really, well, it was a morning out." (p2,M,acu)

"100 times better. Not that I dislike my GP, I think he's fantastic, but you know, I've had counselling over the years and a lot of the problem was I did child protection work for most of my working life and eventually I became so depressed with it and I think this, you know, it's not talking it's treatment you go and have done like a physical treatment. ... I think that's really positive. And a lot more positive than talking to your GP. I think you get to the stage where you've just had enough discussion with people. You just want to feel better.... It made me feel better almost straight away. Whereas talking is a lot more emotional. It's taking a lot more emotion from you and it's also making you think and do things. Sometimes you don't want to do that, you just want to feel better."(p3,M,acu)

"I'm crippled with arthritis. I walk with a walking aid... It was the acupuncture, which was really good. And I really felt it helped. You know, and it also seemed to be doing my back pain good."(p6,F,acu)

"The very first session I had, I came home and I was utterly exhausted, for days... I just couldn't move one foot in front of another. It was really quite bizarre and I said to my husband, if this is what's going to happen every week, I really don't want to do this... I went back and I said, and she was lovely, because I think at first she thought I was not going to come any more. And I said, it made me so tired, please is there something you can do. And she said, oh yes, you could adjust – I don't know, whatever it was she could adjust – and after that I never felt that wretched again. I was absolutely fine... But as soon as I told her and she adjusted things it's never happened again." (p7,F,acu)

"I found that quite from the outset, you know, I soon got to think, oh, I think I'm feeling better. Quite quickly... with some people it works and I was getting a lot from it, while I was having it.... It was absolutely fine for maybe a couple of days, I felt, oh I'm getting better. But then as I stopped it, I thought, I don't feel -- for me, I think it would have to be an ongoing thing."(p8,F,acu)

"It has helped me realise now when I'm getting depressed. It's just something trivial that's set me off and it's not such a big deal after all. I can work around that. And I think without the trial, I don't think I'd be where I am now." (p10,F,acu)

"I found I was coming out of the...building -- I don't know what you'd call it, in a more upbeat and elated manner. So for me personally, I have to say that I found the acupuncture to be a very positive thing in my life. It was something that I found made me feel an awful lot better in myself.... You have to ask yourself the question, does acupuncture work as a form of medicine. Or does some people fussing about your body give you a feel good factor?... I can't answer that... But I would say that I found acupuncture to be very positive in my life."(p12,M,acu)

"The actual process itself wasn't at all painful. Occasionally she'd hit a sort of - a stinging pain – which she always said was something to do with the meridian or some acupuncture explanation... Walking home from it a couple of times I did feel a bit, I won't say light headed, but slightly different." (p14,Macu)

"It was quite relaxing when I was having the treatment, to be honest, which I didn't think it would be. But once I got used to it, and once the needles went in and she left me, that was my time to ... that was my time to relax... I used to look forward to going." (p17,F,acu)

"It wasn't an explanation that made much sense to me in that it was about things like holding grief in your lungs or something -- what on earth does that mean? .....It just sounded like new-age nonsense, to be honest. It sounded unscientific, which I find very off-putting. You know, we need to respect the scientific method, it's how knowledge is acquired and it seemed to me that it wasn't expressed in terms that I could relate to in that kind of way.... on a kind of broader level it did seem to verge on the snake oil." (p19,F,acu)

"as the treatments went on, she sort of tried to give me more energy with different treatments. But then I was having problems with skin rashes and anxiety and things like that, so on other weeks she would treat me differently, depending on what happened that week, whether I'd been feeling more anxious or less anxious or more lethargic.... and she linked it to my menstrual cycle as well. Because when I was coming back in saying that I'd had a particularly bad week, she noticed before I did that that was probably PMS, which sounded really basic. I felt like a right idiot at the time, but obviously that kind of helped me at least find a reason for why..." (p20,F,acu)

"I think that made a big difference because I knew I could feel the treatment instantly. Once the needles were in I could feel it, so I think that really sort of got me feeling positive because I felt as if it was doing me something good within my body. It was really acting for me and working for me... I did feel different and I did feel then as if I wanted to go – you know, the more I'd been the more I wanted to go and have another session!" (p21,F,acu)



| <b>Supplement 7. Experiences of counselling.</b>                                                                                                                                                                                                                                                                                                                                                                                                                                                                                                                                                                                                                                                                                                                                                                                                                                                                                                                                                  |
|---------------------------------------------------------------------------------------------------------------------------------------------------------------------------------------------------------------------------------------------------------------------------------------------------------------------------------------------------------------------------------------------------------------------------------------------------------------------------------------------------------------------------------------------------------------------------------------------------------------------------------------------------------------------------------------------------------------------------------------------------------------------------------------------------------------------------------------------------------------------------------------------------------------------------------------------------------------------------------------------------|
| <p>1<br/>2<br/>3<br/>4<br/>5<br/>6<br/>7<br/>8<br/>9<br/>10<br/>11<br/>12<br/>13<br/>14<br/>15<br/>16<br/>17<br/>18<br/>19<br/>20<br/>21<br/>22<br/>23<br/>24<br/>25<br/>26<br/>27<br/>28<br/>29<br/>30<br/>31<br/>32<br/>33<br/>34<br/>35<br/>36<br/>37<br/>38<br/>39<br/>40<br/>41<br/>42<br/>43<br/>44<br/>45<br/>46<br/>47<br/>48<br/>49<br/>50<br/>51<br/>52<br/>53<br/>54<br/>55<br/>56<br/>57<br/>58<br/>59<br/>60</p> <p>"He was talking about what triggers my major depressive episodes, and it was things like, he was talking about how to recognize the small things that then build into the big things, and how to deal with them and how to recognize them and how to put in place a system of recognizing what I can control and recognizing what I can't. So it was useful in that respect." (p25,M,coun)</p>                                                                                                                                                                   |
| <p>"I suppose that I would have liked her to have been a bit tougher. And sort of ask deeper questions, probably. It's always quite awkward I think, because you go there and you know, it's -- and you've got someone sitting opposite you smiling and thinking, well go on, say something, say something. And they're waiting for you to say something. But you don't know what to say. So it felt a bit strange." (p26,M,coun)</p>                                                                                                                                                                                                                                                                                                                                                                                                                                                                                                                                                             |
| <p>"I felt as if I could talk to her openly and maybe try to get to the bottom of things. Just to see if there is something that could get me on the right road sort of thing... I feel as if it did help the first few months. And then things just steadily over the weeks got back to how it was before...when I had my counselling, I'm sure for two or three months afterwards I felt a lot more positive. I was living in my other house then. I was living in H where the town's quite busy. And I'm sure I was doing more and forcing myself to do more... I remember her saying that you've got to try and be more positive and try to take every day as it comes like and try to do different things. And I think it. I know in my mind what I should be doing. But it's just doing it... I sometimes listen to the radio. But it's usually the television if I'm not sleeping. And the television's just on. I'm not particularly watching anything -- it's just on." (p29,M,coun)</p> |
| <p>"Now I'm happy to put my proper clothes on that match -- as opposed to track suit bottoms and a really grotty t shirt, and not do my makeup and not do my hair. Whereas now I wouldn't dream of going out without having done my hair or my makeup. You know, I've always had my hair short, but I was letting it grow long, because I couldn't even face going to the hairdressers -- that would have been such a challenge." (p32,F,coun)</p>                                                                                                                                                                                                                                                                                                                                                                                                                                                                                                                                                |
| <p>"She said I was a giver.... which means you give to everybody, but then you don't expect anything back. But she said everybody needs to have something back. You can't keep on giving and giving, because she said, you'll burn yourself out and that's not fair on you, she said, or on your family... [She] would say to me...it's all fallen back on you, hasn't it?... I only live down the road from my parents, and I can't see them struggling... They know that at the end of the day, it's me who's the reliable one, if you like.... She said, why should you have to be the one who's always doing that. Or who's expected to do it."(p33,F,coun)</p>                                                                                                                                                                                                                                                                                                                               |
| <p>"Difficult to say... external changes made things a lot easier... a second job... a bit more money... the holiday abroad booked... it was difficult to tell whether it was her counselling that had helped me or the changes in our circumstances that had improved."(p35,F,coun)</p>                                                                                                                                                                                                                                                                                                                                                                                                                                                                                                                                                                                                                                                                                                          |
| <p>"I thought it was helpful. At the time I was on a bit of an even keel, so I didn't really need it that much. But, you know, I still had problems and everything, so I found it really helpful just getting to know my own traits a bit more so that when I do have bad episodes... I don't think I really have changed. I think I feel a bit more insightful into things and maybe a bit more wise... Talking about your life and you know, it's not like he told me what to do and how to feel about things, but just asked the right questions and get you to talk things out in your own head. It's almost like you're having a conversation with yourself, it gives you the right...to think about the right things." (p36,F,coun)</p>                                                                                                                                                                                                                                                     |
| <p>"And I thought well what, you know, what is this all about. I'm not getting anywhere. And then either she said something or I said something and it twigged... And I said to her, I said, it's like defragging a computer. And putting that stuff into little boxes, or into -- and chucking out the stuff that the mind or the computer doesn't want. And as soon as I said that, things started to click into place...I don't know whether it was through trust probably, and seeing the right person, I was able to download, or offload all those things to L and she put it into perspective." (p37,M,coun)</p>                                                                                                                                                                                                                                                                                                                                                                           |
| <p>"Before, I'd given up on life and I couldn't see a way forward. What was the point? Because I was physically unable to do anything I wanted to do. But now I look at it more positive." (p42,F,coun)</p>                                                                                                                                                                                                                                                                                                                                                                                                                                                                                                                                                                                                                                                                                                                                                                                       |
| <p>"I think I'm doing all right. I know I'm hard on myself. I'm very hard on myself... but I'm not doing it consciously. I'm doing it unconsciously. So that is harder to control. Because I'm making decisions on something and not really thinking, I'm just doing it. And thinking, yeah, I can do this. And maybe I don't even know what I'm doing to set the bar... I'm setting the bar and not really thinking about it." (p43,F,coun)</p>                                                                                                                                                                                                                                                                                                                                                                                                                                                                                                                                                  |
| <p>"I think my understanding of myself has changed beyond recognition. Yeah. I would say I'm a lot more self-aware and a lot more -- you know, I do understand myself a lot better than I did a year ago. Not only that, I actually accept myself a lot more than I did a year ago. I can actually say, you know, this is me." (p45,F,coun)</p>                                                                                                                                                                                                                                                                                                                                                                                                                                                                                                                                                                                                                                                   |
| <p>"I don't know, she sort of -- you know when somebody says something and it just actually resonates. And it's a much more real experience. Things click into place, somehow... You know, just putting it into a visual -- just in a way, I don't know, something just clicked. Something that I understood. I think they sort of tapped more into me as a person, and I wasn't just being talked at or... Because sometimes you can talk and you know that you're not connecting on any level and they don't understand you and they're not actually really listening to what you're saying." (p44,F,coun)</p>                                                                                                                                                                                                                                                                                                                                                                                  |
| <p>"the counselling that I received and my domestic violence support, helped me to understand why I was feeling the way that I was and obviously to, you know, talk about the things that I was experiencing. And get it all off my chest. I'm in a much better place now... They listened. I didn't realize that I needed somebody to talk to.... So having somebody outside of that bubble.... if they needed to give me advice, then a professional, experienced opinion was easier and it would come across differently as well. And they could listen without getting upset... I think it was just having that outside person to possibly shed a tear with, who was not emotionally involved." (p46,F,coun)</p>                                                                                                                                                                                                                                                                              |

**Supplement 8. Experiences of usual care.**

"I'm on antidepressants and I sort of go through good periods and bad periods and when I'm in a good period I try to come off the tablets, because I don't want to be dependent on them. But I realise that by coming off the tablets, I needed them. And I had to go back onto them. And because I'm so worried about being dependent on them, you know... there doesn't seem to be any help out there, other than some tablets that will just keep me on an even keel. And sometimes the tablets even when I'm happy don't even allow me to be as happy as I should be... Yeah, it's like you're just sort of on one level all the time. Yeah, you're not depressed and you're not anxious, but you just don't get any excitement or, you know, at times when you should really. And it's really weird. A weird thing really. It's really hard to describe. You just can't seem to muster up any enthusiasm... I was more concerned about my anxiety. I asked if there was any kind of drug that I could have just to control my anxiousness, you know. Something instantly, you know, when I could feel myself getting anxious. But there was nothing that they could prescribe for me... at the moment I just feel like I've reached a dead end. There's nowhere else for me to go and nobody's going to make me any better, other than continually giving me these drugs. There's no treatment for me. There's no treatment for me unless I pay for it." (p50,F,uc)

"It's kind of got to a stalemate really. I think that's the way of it. I was trying to think about this, really. I think one of the things for me that kind of was a problem, if you'd want to call it that, was now everything's on the repeat prescription thing, normally with my former doctor, you'd go once a month or whatever, just to get a repeat prescription. And that 10 minutes was kind of just enough to almost keep you going. And my old doctor I'd known for a long time. The new one, maybe only six years or so, but now because everything's on repeat, I don't think I saw her at all last year, because you just don't need to... I normally do try and see her because obviously, you know, it's easier in a way if you do see the same person, for them as well... the GPs just don't have time, I mean, you're there 10 minutes; there's nothing much you can say, really. But I think that certainly for me, that not going regularly hasn't helped... But unfortunately now, whatever care there is out there, it's rationed – not rationed, it's just that the time and the cost and you know – I think that's just one of those things, isn't it, really." (p52,F,uc)

"I've got fluoxetine tablets and they seem to have helped a bit, because I mean before I started taking them I was suicidal – I used to think about it quite a lot... supposed to take one a day, but I take one every other day. And it seems to have taken the edge off the panic. I don't pace around the house as much as I used to do... I worry about side effects. I'm on loads of other medication as well for... various other bits and pieces... It's not that I'm worried about getting addicted to them. I just don't want to be – I don't want to take the edge off too much, you know what I mean... I'm still really depressed and I still think about suicide a lot. The mess I'm in at the moment is just unbelievable. It would take me all day to explain the mess I'm in... it's just the people that it would upset if I did, you know. Like my son. And my dad. My dad's not well and I don't want to upset him either." (p54,M,uc)

"What he wanted to do was refer me to this, I think it was a link worker was what he said, and I went, and he said it will take a few months and you'll get your appointment... I have to be honest, the doctor that I saw... he's amazing. He is a particularly good doctor. He was actually the one that helped me with my fibre intolerance. It was always brushed off by other doctors and he realized that it was a real struggle for me and I was in a lot of pain. And with this as well, he was – he actually sat and listened and understood. And then he said, look I'll recommend you, but there is a long wait. And I'll put you on these tablets to tide you over, but I don't think it's for you. And I said, well neither do I, but I can't – and I don't know if it would have happened with any other doctor. How long I would have to have waited." (p55,F,uc)

"I have seen a counsellor but I didn't really find it beneficial... but I decided there and then that I didn't want to pursue it. You know, I find sometimes that they talk in like, clichés. Do you know what I mean?... I think she was fairly experienced. She had like lots of candles and she had lots of alternative things, you know. Yeah, but I just felt, oh, I think we're talking in clichés here. And it's not really helping." (p56,F,uc)

"I was referred to a counsellor last August, and it took six months for me to get the appointment through... And I had two sessions with this counsellor (link worker) and I was starting to feel a lot better and she said that I didn't need to see her any-more and that I was managing to cope on my own, so it was really quick, but I did feel really good actually at the time... I had a couple of sessions with her. And I did feel really good. I felt really in control and everything... It just took an awfully long time to come through. And I could really have done with it at the time, rather than having to wait six months... You really need somebody to help you, well more or less straight away. A couple of weeks really. That was the problem with it." (p57,F,uc)

"The GP was very, very good. Recognised quite early on what was happening and basically put me on some antidepressants which were nominal. They didn't really stop a downward slide but as she progressed – I mean she couldn't actually refer me to anything straight away – she just wanted to make sure she was right... But she eventually said, you know exactly what you're doing so you can regulate your own medication – it's there, whatever you need at the time. Obviously if I need a review I go every six months or whatever for a complete review. And I can't change medication myself, I can't kind of prescribe myself something new, but the medication that I do take is available. It's there on the... I can just go, I need some of that, and if it's there I can have it. She trusts me to actually look after myself as it were. To draw up my own strategies for survival, if you like." (p59,M,uc)

## Consolidated criteria for reporting qualitative studies (COREQ): 32-item checklist

Developed from:

Tong A, Sainsbury P, Craig J. Consolidated criteria for reporting qualitative research (COREQ): a 32-item checklist for interviews and focus groups. *International Journal for Quality in Health Care*. 2007. Volume 19, Number 6: pp. 349 – 357

**YOU MUST PROVIDE A RESPONSE FOR ALL ITEMS. ENTER N/A IF NOT APPLICABLE**

| No. Item                                       | Guide questions/description                                                                                                                              | Reported on Page #   |
|------------------------------------------------|----------------------------------------------------------------------------------------------------------------------------------------------------------|----------------------|
| <b>Domain 1: Research team and reflexivity</b> |                                                                                                                                                          |                      |
| <i>Personal Characteristics</i>                |                                                                                                                                                          |                      |
| 1. Interviewer/facilitator                     | Which author/s conducted the interview or focus group?                                                                                                   | Methods              |
| 2. Credentials                                 | What were the researcher's credentials?<br>E.g. PhD, MD                                                                                                  | Contributors section |
| 3. Occupation                                  | What was their occupation at the time of the study?                                                                                                      | Contributors section |
| 4. Gender                                      | Was the researcher male or female?                                                                                                                       | Contributors section |
| 5. Experience and training                     | What experience or training did the researcher have?                                                                                                     | Contributors section |
| <i>Relationship with participants</i>          |                                                                                                                                                          |                      |
| 6. Relationship established                    | Was a relationship established prior to study commencement?                                                                                              | Methods              |
| 7. Participant knowledge of the interviewer    | What did the participants know about the researcher? e.g. personal goals, reasons for doing the research                                                 | Methods              |
| 8. Interviewer characteristics                 | What characteristics were reported about the interviewer/facilitator? e.g. Bias, assumptions, reasons and interests in the research topic                | Contributors section |
| <b>Domain 2: study design</b>                  |                                                                                                                                                          |                      |
| <i>Theoretical framework</i>                   |                                                                                                                                                          |                      |
| 9. Methodological orientation and Theory       | What methodological orientation was stated to underpin the study? e.g. grounded theory, discourse analysis, ethnography, phenomenology, content analysis | Methods              |
| <i>Participant selection</i>                   |                                                                                                                                                          |                      |
| 10. Sampling                                   | How were participants selected? e.g. purposive, convenience, consecutive, snowball                                                                       | Methods              |
| 11. Method of approach                         | How were participants approached? e.g. face-to-face, telephone, mail, email                                                                              | Methods              |

|                                        |                                                                                                                                 |                                    |
|----------------------------------------|---------------------------------------------------------------------------------------------------------------------------------|------------------------------------|
| 12. Sample size                        | How many participants were in the study?                                                                                        | Results                            |
| 13. Non-participation                  | How many people refused to participate or dropped out? Reasons?                                                                 | Results                            |
| <i>Setting</i>                         |                                                                                                                                 |                                    |
| 14. Setting of data collection         | Where was the data collected? e.g. home, clinic, workplace                                                                      | Methods                            |
| 15. Presence of non-participants       | Was anyone else present besides the participants and researchers?                                                               | Methods                            |
| 16. Description of sample              | What are the important characteristics of the sample? e.g. demographic data, date                                               | Results                            |
| <i>Data collection</i>                 |                                                                                                                                 |                                    |
| 17. Interview guide                    | Were questions, prompts, guides provided by the authors? Was it pilot tested?                                                   | Methods                            |
| 18. Repeat interviews                  | Were repeat inter views carried out? If yes, how many?                                                                          | N/A Methods                        |
| 19. Audio/visual recording             | Did the research use audio or visual recording to collect the data?                                                             | Methods                            |
| 20. Field notes                        | Were field notes made during and/or after the inter view or focus group?                                                        | Methods                            |
| 21. Duration                           | What was the duration of the inter views or focus group?                                                                        | Methods                            |
| 22. Data saturation                    | Was data saturation discussed?                                                                                                  | Methods                            |
| 23. Transcripts returned               | Were transcripts returned to participants for comment and/or correction?                                                        | N/A Methods                        |
| <b>Domain 3: analysis and findings</b> |                                                                                                                                 |                                    |
| <i>Data analysis</i>                   |                                                                                                                                 |                                    |
| 24. Number of data coders              | How many data coders coded the data?                                                                                            | Methods                            |
| 25. Description of the coding tree     | Did authors provide a description of the coding tree?                                                                           | Methods                            |
| 26. Derivation of themes               | Were themes identified in advance or derived from the data?                                                                     | Methods                            |
| 27. Software                           | What software, if applicable, was used to manage the data?                                                                      | N/A Methods                        |
| 28. Participant checking               | Did participants provide feedback on the findings?                                                                              | Methods                            |
| <i>Reporting</i>                       |                                                                                                                                 |                                    |
| 29. Quotations presented               | Were participant quotations presented to illustrate the themes/findings? Was each quotation identified? e.g. participant number | Results & Supplements 4-8          |
| 30. Data and findings consistent       | Was there consistency between the data presented and the findings?                                                              | Relationship to existing knowledge |
| 31. Clarity of major themes            | Were major themes clearly presented in the findings?                                                                            | Results                            |
| 32. Clarity of minor themes            | Is there a description of diverse cases or discussion of minor themes?                                                          | Results Negative views presented   |

1 ACUDEP Qualitative Sub-study V5 19 MAY **SHOWING TRACKED CHANGES** bmjopen-2014-005144,

2  
3  
4  
5  
6  
7  
8  
9  
10 **TITLE: Patients' experiences of acupuncture and counselling for depression and comorbid pain: a**  
11 **qualitative study nested within a randomised controlled trial.**

12  
13  
14  
15  
16  
17 Ann Hopton<sup>1</sup>, Janet Eldred<sup>1</sup>, Hugh MacPherson<sup>1</sup>

18  
19 <sup>1</sup> *Department of Health Sciences, University of York, UK*

20  
21  
22 **Keywords;** depression, comorbid pain, primary care, acupuncture, humanistic counselling  
23  
24  
25  
26  
27  
28  
29  
30  
31  
32  
33  
34  
35  
36  
37  
38  
39

40 **Address for correspondence:**

41 Ann Hopton  
42 Research Fellow  
43 Department of Health Sciences  
44 University of York  
45 Heslington  
46 York YO10 5DD  
47 United Kingdom  
48 Tel: 01904 321384  
49 E-mail: [ann.hopton@york.ac.uk](mailto:ann.hopton@york.ac.uk)  
50  
51  
52  
53  
54  
55  
56  
57  
58  
59  
60

2 ACUDEP Qualitative Sub-study V5 19 MAY **SHOWING TRACKED CHANGES** bmjopen-2014-005144,

## ABSTRACT

### Introduction

Depression and pain frequently occur together and yet we have insufficient knowledge of how this comorbidity impact on outcomes of existing treatment for depression. Additional treatment options are required. from the patient's perspective. This study aimed to explore patients' experiences of depression, the processes of change within acupuncture and counselling, and the elements that contributed to longer-term change.

### Methods

In a sub-study nested within a randomised controlled trial of acupuncture or counselling compared to usual care alone for depression, semi-structured interviews of 52 purposively sampled participants were conducted and analysed using thematic analysis.

### Results

Differences were reported by participants regarding their experience of depression with comorbid pain compared to depression alone. Along with physical symptoms often related to fatigue and sleep, participants with depression and comorbid pain generally had fewer internal and external resources available to manage their depression effectively. Those who had physical symptoms and were receiving acupuncture commonly reported that these were addressed as part of the treatment. For those receiving counselling, there was less emphasis on physical symptoms and more on help with gaining an understanding of themselves and their situation. Over the course of treatment, most participants in both groups reported receiving support to cope with depression and pain independently of treatment, with a focus on relevant lifestyle and behaviour changes. The establishment of a therapeutic relationship and their active engagement as participants were identified as important components of treatment.

### Conclusion

Participants with and without comorbid pain received acupuncture or counselling for depression, and reported specific identifiable treatment effects. The therapeutic relationship and participants' active engagement in recovery may play distinct roles in driving long-term change. For patients who present with both depression and physical symptoms of care may wish to consider a short course of acupuncture to relieve symptoms prior to a referral for counselling if needed. This study has implications for policy makers and providers of care for primary care when considering referral of patients with depression and comorbid pain. [ISRCTN63787732](#)

### Strengths

- The 52 telephone interviews were obtained from a wide range of participants in socially diverse settings and provide rich data on the participants' experiences of depression and the treatment received in the ACUDeP trial.
- The thematic analysis was conducted using a bottom-up process to allow the themes to develop directly from the participants' own words, and we present the positive and negative experiences of each form of treatment, whether treatment was beneficial or not.
- Our findings identify mechanisms within the processes of change that are specific to acupuncture and counselling that facilitate reduction in the symptoms of depression.

### Limitations

- Participants may have attributed changes directly to treatment rather than concurrent, coincidental contextual changes.
- There is a possibility of recall bias; however, it is likely that the participants recalled the aspects of treatment that were most salient to them.
- Telephone interviews prevented the interviewer gathering non-verbal contextual information, although this form of interview was more acceptable to participants than a face-to-face interview.



3 ACUDEP Qualitative Sub-study V5 19 MAY **SHOWING TRACKED CHANGES** bmjopen-2014-005144,

## INTRODUCTION

Chronic pain is commonplace in half to two-thirds of participants with major depressive disorder.[1][2] The association between pain and depression becomes stronger as the severity of either increases,[3][4] and the impact of both problems on each other plays an important role in the development and maintenance of chronicity in health problems.[5] Participants with depression and comorbid pain are difficult to diagnose, feel an increased burden of disease, tend to rely heavily on health care services and are more difficult to treat.[6] Identifying and managing the pain symptoms that commonly occur alongside symptoms of depression may be important in improving depression response and remission rates.[7] Previous qualitative research reports that patients with comorbid pain and depression identify the ineffectiveness of existing pain relief strategies, a lack of tailoring strategies to meet personal needs and difficulties with patient –physician interaction as barriers to the effective self-management of their symptoms.[8] Patients appreciate a health-care approach that is individualised [9]and are open to the value of complementary-health-care.[10] Two health-care options that offer these attributes are acupuncture and counselling.

There is a growing evidence base in support of the effectiveness of acupuncture for a range of musculoskeletal conditions;[11][12] however, despite its widespread use by participants[13] there has been limited evidence for acupuncture as an effective treatment option for depression.[14] Patients' with strong preferences for psychotherapy or counselling for depression are not likely to engage in antidepressant treatment,[15] yet the evidence for counselling as a treatment for depression is limited[16] despite widespread utilisation in primary care in the UK, with around 90% of general practices providing on site counselling services.[17] To address this evidence gap, a randomised controlled trial (ACUDep) compared acupuncture or counselling to usual care as treatments for primary care patients with ongoing depression.[18] The results showed that both acupuncture and counselling were clinically effective in reducing depression in the short to medium term.

In a quantitative sub-study nested within this trial, which focused on the effect of comorbid pain on the outcome of treatment for depression,[19] it was found that approximately 50% of the ACUDep participants had co-morbid pain with depression and that the participants' pain scores at baseline predicted the outcome of treatment for depression at the three-month follow up point. A comparison of the treatments showed that patients with depression and comorbid pain had a better outcome in the short to medium-term with acupuncture.

The ACUDEP trial[18] was novel in its' investigation of acupuncture or counselling compared to usual care; yet in focusing on the clinical effectiveness of the treatments offered, the published results did not set out how the process of change occurred as a results of receiving the three treatments of acupuncture, counselling and usual care . To meet this evidence gap the aim of this qualitative study nested within the ACUDep trial, is to explore patients' reports of their experiences and identify from their reports how each intervention influences long-term change.

## METHODS

### Design

This research comprised a qualitative sub-study nested within a three-arm randomised controlled trial conducted between November 2009 and June 2012 of acupuncture or counselling provided as an adjunct to usual care compared to usual care alone alone.[18] In this nested qualitative sub-study, a purposive sampling frame was prepared to recruit interviewees in the same 2:2:1 proportion of the main trial, to include 50% males and 50% females in each arm and to balance whether in pain at baseline or not.– The design used a- constructivist approach to grounded

4 ACUDEP Qualitative Sub-study V5 19 MAY **SHOWING TRACKED CHANGES** bmjopen-2014-005144,

theory[20] to ensure that the theories were constructed by the researchers as a result of their interaction with the area of the research and the participants.

### Participants

Within the ACUDEP trial,[18] 755 participants aged 18 and over with a history of on-going depression and score of 20 or more on the Beck Depression Inventory (BDI-II) were recruited by general practitioners at 27 primary care practices across Yorkshire, County Durham and Northumberland. Participants were allocated remotely by the York Trials Unit, with the allocation code concealed from the recruiting researcher, to three groups in the proportions of 2:2:1 to acupuncture, counselling and usual care alone respectively. Within the acupuncture arm, 23 acupuncturists registered with the British Acupuncture Council for a minimum of three years delivered up to 12 acupuncture treatments per patient, usually weekly. Treatments were tailored to individual participants' needs within a trial protocol,[21] which included treating symptoms according to traditional Chinese medicine theory and the integration of relevant life-style support into the treatment strategy based on acupuncture-specific advice if considered appropriate by the acupuncturists. Within the counselling arm, 37 counsellors registered with the British Association of Counselling and Psychotherapy provided up to 12 sessions of humanistic counselling delivered according to a trial protocol[22] which stated: "Counsellors will use empathy and advanced listening skills to help clients express feelings, clarify thoughts, and reframe difficulties, but they will not give advice or set homework." Deviations from the trial protocol were permissible if considered necessary and recorded in the participant's log book. Usual care comprised the treatment that patients typically receive in primary care along with over-the-counter medication. Commonly prescribed medication included anti-depressants and analgesics. Participants were followed up over a period of 12 months after randomisation by postal questionnaire at 3, 6, 9 and 12 months. On receipt of their final 12-month postal questionnaire and based on a sampling frame (see Supplement 1), a sample of participants who had previously consented to be contacted for an interview -were invited to engage in a telephone interview of approximately 30 minutes duration. Altogether 52 people consented to a one-to-one, audio-recorded, semi-structured telephone interview for this study.

~~In this nested qualitative sub-study, a purposive sampling frame was prepared to recruit interviewees in the same 2:2:1 proportion of the main trial, to include 50% males and females in each arm and to balance whether in pain at baseline or not. On receipt of their final 12 month postal questionnaire and based on a sampling frame (see Supplement 1), a sample of participants who had previously consented to be contacted for an interview -were invited to engage in a telephone interview of approximately 30 minutes duration. Altogether 52 people consented to a one-to-one, audio-recorded, semi-structured telephone interview for this study.~~

### Interviews

A researcher (AH) interviewed all 52 participants. The researcher was unknown to the participants prior to the interview, therefore the interview opened with an introduction designed to set the participant at ease, to reveal the context for their depression, and to draw out the participant's account of treatment received as part of the trial. Prompts from a prepared topic guide were used to elicit the participants' experiences of depression and treatment. (See Supplement 2) The topic guide had been piloted previously and granted ethical approval by the University of York ethics committee.

All the interviews were conducted between February and May 2012. On average the interviews lasted approximately 25 minutes (range 11-46 minutes). Three participants were ill and felt fatigued, but were eager to participate, therefore exploration of the questions for these people was limited in time to prevent over-burdening them. To encourage participants to relax, each participant was asked to introduce themselves by speaking about things they like to do or hoped to do and then

5 ACUDEP Qualitative Sub-study V5 19 MAY **SHOWING TRACKED CHANGES** bmjopen-2014-005144,

how depression had entered their lives, before moving on to the research-related questions within the topic guide. Interviews were audio-taped, transcribed verbatim and checked for accuracy. All recordings were of sufficient clarity and content that no repeat interviews were necessary. Each transcription was checked to remove any names and assigned a participant identification number.

### Analytical methods

An inductive thematic analysis[23] was used to search across the dataset of 52 transcribed interviews. Using a constructivist approach to grounded theory,[20] data was analysed initially by AH by reading each transcript several times, then annotating ideas to generate a list of potential inductive codes developed from the dataset to capture and summarise the participants' experiences. Coding was performed sequentially on each transcript, initially without software, working systematically throughout the entire dataset. As codes were identified, they were recorded and organised on an Excel spread-sheet; sections of text that demonstrated that code were then added and collated moving back and forth across the data set making comparisons with previous data in an iterative process.

Coding and extractions were checked by JE to verify that the participants' experiences were reflected and summarised accurately. As coding progressed, comparisons were made between codes and phrases and those with similar context or concepts were grouped together. This process was conducted within each interview and across interviews resulting in a codebook of 33 codes, seven subthemes and two themes associated with the experience of depression, (Table 1) and a codebook of 35 codes and four themes associated with the experience of the treatment; (Table2). Saturation for the main themes occurred within each treatment option within 5-7 interviews. The coding and identification of themes were discussed and developed throughout between AH, HM and JE.

| Table 1. Coding tree; A summary of the relationships between codes, subthemes and themes for the experience of depression |                 |                                 |
|---------------------------------------------------------------------------------------------------------------------------|-----------------|---------------------------------|
| CODES                                                                                                                     | SUBTHEMES       | THEMES                          |
| Muscular pain                                                                                                             | Pain            | Reported symptoms of depression |
| Headaches                                                                                                                 |                 |                                 |
| Gastro-intestinal pain                                                                                                    |                 |                                 |
| Disability                                                                                                                |                 |                                 |
| Search for diagnosis                                                                                                      |                 |                                 |
| Tired all the time                                                                                                        | Fatigue         |                                 |
| Exhausted- worn out                                                                                                       |                 |                                 |
| Debilitated                                                                                                               |                 |                                 |
| No energy                                                                                                                 |                 |                                 |
| Withdrawal                                                                                                                | Sleep disorders |                                 |
| Insomnia                                                                                                                  |                 |                                 |
| Early wakening                                                                                                            |                 |                                 |
| Nightmares                                                                                                                |                 |                                 |
| Too much sleep                                                                                                            |                 |                                 |
| Low self esteem                                                                                                           |                 | Negative schema                 |
| What other people think                                                                                                   |                 |                                 |
| Guilt and self-blame                                                                                                      |                 |                                 |
| Black and white thinking                                                                                                  |                 |                                 |
| Family life                                                                                                               |                 |                                 |
| Motherhood                                                                                                                |                 |                                 |

6 ACUDEP Qualitative Sub-study V5 19 MAY **SHOWING TRACKED CHANGES** [bmjopen-2014-005144](https://bmjopen-2014-005144),

|                                    |             |                    |
|------------------------------------|-------------|--------------------|
| Caring                             | Home life   |                    |
| Bereavement                        |             |                    |
| Isolation                          |             |                    |
| Shift pattern                      | Work strain | Contextual factors |
| Work overload                      |             |                    |
| Drive, motivation                  |             |                    |
| High bar, aiming high              |             |                    |
| Crime                              | Victimhood  |                    |
| Bullied/ threat/<br>physical abuse |             |                    |
| Self-harm                          |             |                    |
| Childhood                          |             |                    |

To understand the participants’ individual experiences of depression and the treatments received, the codes and themes were developed into a diagram (see Supplement 3) and populated with participants’ identity numbers. This enabled the researcher (AH) to trace each participant and their journey throughout the process, and to make distinctions between those with depression and comorbid pain, and those with depression alone.

Throughout this paper the themes are illustrated with quotes that capture and embody the participants’ experiences embedded within the analytical narrative as suggested by Braun and Clarke.[23] Additional illustrative quotes are set out in Supplements 4-8.

**Table 2. Coding tree; A summary of the relationships between codes and themes for the positive and negative experience of treatment; factors that influence long term change and mediating factors**

| CODES                                  |                       | THEME                |
|----------------------------------------|-----------------------|----------------------|
| Beliefs and attitudes                  | Pre-treatment factors | Mediating factors    |
| Previous experience of treatment       |                       |                      |
| Participant engagement                 | In treatment factors  |                      |
| Therapeutic relationship               |                       |                      |
| Change of perspective                  | (common to all arms)  | Positive experiences |
| Reduced medication                     |                       |                      |
| Relaxation                             | (acupuncture)         |                      |
| Complaints & symptoms treated          |                       |                      |
| Self-understanding                     | (counselling)         |                      |
| Acceptance of situation                |                       |                      |
| Empowerment                            |                       |                      |
| Effective medication                   | (usual care)          |                      |
| Referral to NHS mental health services |                       |                      |
| Adverse events                         | (acupuncture)         |                      |
| Terminology                            |                       |                      |
| Time consuming                         |                       |                      |
| Fear of needles                        |                       |                      |

|                                                  |                        |                                |
|--------------------------------------------------|------------------------|--------------------------------|
|                                                  |                        |                                |
| Difficulty opening up                            | (counselling)          |                                |
| Clichéd phrases                                  |                        | Negative experiences           |
| Opened a can of worms                            |                        |                                |
| Expense                                          |                        |                                |
| Side effects of medication                       |                        |                                |
|                                                  |                        |                                |
| Long wait after referral                         | (usual care)           |                                |
| Lack of general practitioner time and continuity |                        |                                |
| Ageism                                           |                        |                                |
|                                                  |                        |                                |
| Exercise advice                                  | } Lifestyle strategies | } Long term behavioural change |
| Dietary advice                                   |                        |                                |
| Reduce alcohol intake                            |                        |                                |
| Take time out                                    |                        |                                |
| Day to day structure                             |                        |                                |
|                                                  |                        |                                |
| Distraction                                      | } Cognitive strategies | }                              |
| Thinking strategies learned                      |                        |                                |
| Self- talk & Stoicism                            |                        |                                |
| Social contact                                   |                        |                                |
| Seeking support                                  |                        |                                |

## RESULTS

### Participants recruited

Of the 755 participants randomised in the ACUDep trial, **674 completed their 12-month follow up**; 518 had consented to be interviewed **and of** these 518, 464 (89%) were potentially eligible to join the study. Of the 61 participants invited, four declined participation and three did not respond. A total of 52 participants, comprising 24 men, and 28 women with an age range of 22 to 89 years (mean 46 years, SD 13.8) were interviewed. At baseline, 26 of these participants had reported having moderate or extreme pain or discomfort on the EQ5D questionnaire; these people formed the pain group, the remainder formed the no-pain comparator group. As part of the ACUDep trial, 22 of the 52 had been randomised to receive acupuncture, 20 to counselling and 10 received usual-care alone. A summary is presented in the sampling frame in Supplement 1. On average, those allocated to acupuncture attended 11 sessions (range 4-12) and those allocated to counselling attended 10 sessions (range 6-12).

### Symptoms experienced with depression and contextual factors

Participants reported a range of symptoms they experienced concurrently with depression: predominantly pain, fatigue and sleep disorders (see Supplements 3-4). Most participants with depression and comorbid pain suffered from either persistent headaches or moderate to extreme muscular-skeletal pain that predated the onset of depression and compromised their mobility, to the extent that four men had considered suicide, and one man had attempted suicide. Almost half of those in pain experienced sleep disturbances or an overwhelming loss of energy to the point where much of their time was spent in bed, withdrawing from social and day-to-day activities. (See Supplement 3)

*"There are times when things like headaches and neck aches prevent sleep... I sort of drift 48 hours without sleeping... I have in the past been, if you like, down for a prolonged period of time...just sleep and sleep and sleep and sleep and wake up and do something for half an*

8 ACUDEP Qualitative Sub-study V5 19 MAY **SHOWING TRACKED CHANGES** bmjopen-2014-005144,

1  
2  
3 *hour and then go back to sleep again. I can just about function with pain killers... The only*  
4 *time I did try to top myself that led to even more depression because I couldn't even do that*  
5 *right! I'd taken a boat load of the diazepam I was on, to try and calm me down. I'd sort of*  
6 *stock piled some of that...washed it all down with Glenfiddich, and instead of, you know, just*  
7 *shuffling off quietly, all I did was end up waking up feeling absolutely dreadful in a puddle of*  
8 *my own vomit, and it was one of those things where, you know, it took me weeks afterwards,*  
9 *thinking well, I can't even kill myself properly.”(p25,M,coun)*

10  
11  
12 With regards to contextual factors, for the majority of the pain group, the pain they experienced  
13 had compromised their ability to work. Very few had social support, and for some, their being at  
14 home meant that they were the family member available to take on a caring role for a relative,  
15 which incurred further stress, ill health and isolation. (See supplement 5)

16  
17  
18 *“Because I was off and not working I was able to have the time to look after my elderly*  
19 *mother and aunt who were both in their 80s. So I was their carer for 4 years and*  
20 *unfortunately I lost both of them and my father 4 years ago, within 6 months of each*  
21 *other...My IBS is certainly related to depression yeah...When I was looking after the old*  
22 *dears, as I call them, I was offered an operation twice and I turned it down because I didn't*  
23 *want to be, you know, incapacitated and not able to look after them. Once they passed on, I*  
24 *was then able to address my own health problems.” (p26,M,coun)*

25  
26  
27 In summary, for the participants with depression and comorbid pain, the symptoms experienced  
28 impacted on the most basic level of physiological needs, and reduced their ability to engage in social  
29 activity, whilst the contextual factors compromised their security through reduced income. Together  
30 these factors suggest that this group of people have few internal and external resources remaining  
31 to effectively manage their depression.

32  
33 Of the participants who were pain-free at baseline, several people complained of tension headaches  
34 or gastro-intestinal symptoms they experienced at times of heightened stress and anxiety. Several  
35 others identified distinct patterns of disordered sleep: either difficulty in settling to sleep or a  
36 pattern of early wakening. Similar to the pain group, a few tended to withdraw at times when they  
37 felt particularly low in mood.

38  
39  
40 *“I get a lot of stomach problems actually when I feel depressed...And of course, really tired as*  
41 *well – very, very tired when I'm feeling down...Sometimes I find it really hard to cope with*  
42 *people. I can possibly be a bit grumpy sometimes, or really quiet. Because I can't really face*  
43 *talking to anybody on certain days...I just can't bear it.” (p57,F,uc)*

44  
45 Regarding contextual factors, the majority in the no-pain comparator group were in full or part-time  
46 employment or were relatively affluent retired professional people. For many, their experience of  
47 depression concerned feelings of low self-esteem brought about by high expectations of themselves  
48 within their working life, or hectic social schedules. Others experienced low self-esteem and threats  
49 to their security from bullying at work or as a victim from domestic violence.

50  
51  
52 *“We're also dance teachers, which is supposed to be a hobby but has somehow involved*  
53 *taking over our lives... we're teaching three nights a week, so it's a bit of a commitment for a*  
54 *hobby... Because when we started teaching last May time... that did give me more of an*  
55 *impetus to actually make the effort, because once you've got teaching you've got to go,*  
56 *because you're going to let people down. And I'm always glad that I do. If I'm having low*  
57 *days now, I'm always glad that I've been, because I'm concentrating on stuff that's*



9 ACUDEP Qualitative Sub-study V5 19 MAY **SHOWING TRACKED CHANGES** bmjopen-2014-005144,

1  
2  
3 *completely outside of me or completely outside of my normal life... One of the things that's*  
4 *come through is that I hate letting people down. I'm very hard on myself." (p45,F,coun)*

5  
6 *"I tend to keep my things bottled up... And it really gets me down. My work suffers. My home*  
7 *life suffers. And everything suffers if I'm really bogged down with something....following a*  
8 *particular incident, or a series of incidents... I chose to or had to be the brunt for a lot of the*  
9 *aggression and violent behaviour that this man displayed at the time. So if you like, there*  
10 *was a particular traumatic... there was a starting point for it." (p38,M,coun)*

11  
12 In general, the no-pain comparator group experienced fewer demands physiologically. Most had  
13 their basic security and social needs met; this group had larger reserves of both internal and external  
14 resources available to them to cope with their depression.

15  
16  
17 **Processes of change reported by those receiving acupuncture: positive and negative experiences**

18 The processes of change identified within the data formed three stages: primarily, developing a  
19 therapeutic relationship; secondly, the individual diagnosis and treatment of symptoms; and finally,  
20 engendering changes in health behaviours. Within the pain group and the no-pain comparator  
21 group, the positive experiences tended to facilitate the process of change at each stage, whilst  
22 negative experiences contributed to the barriers to change. Most participants welcomed the  
23 opportunity to try something different for their depression. The acupuncturists' understanding of  
24 their symptoms and explanations of how acupuncture might help their particular problems initiated  
25 the development of a therapeutic relationship. In contrast, two people described their acupuncturist  
26 as brisk, efficient and professional, yet lacking in bedside manner.

27  
28  
29 *"She was very positive about things...I think you have more of an intimate relationship with*  
30 *the person doing that rather than just a person in an office somewhere. You're physically*  
31 *involved." (p11,M,acu)*

32  
33 *"They could do with a course in empathy." (p22,F,acu).*

34  
35 Within the second stage of treatment, for most participants, the therapeutic relationship was  
36 further fostered through the acupuncturist listening to the participants' concerns, and treating the  
37 symptoms of depression depending on what was diagnosed to be of most importance to the  
38 participant at that point. Within the pain group, several people experienced relief from  
39 musculoskeletal pain which tended to last for a few hours or days after the session and  
40 improvement commonly built up over several sessions. Several also reported feeling deeply relaxed  
41 during the sessions and an uplifting sense of well-being afterwards.

42  
43  
44 *"I thought it was quite a strange sort of feeling, but I sort of felt better quite quickly. And*  
45 *then I went to the second and the third, it was... it completely lifted my mood and it made me*  
46 *feel more motivated...It was almost as if a weight had been lifted off my head and all of a*  
47 *sudden I felt like some energy had come back." (p3,M,acu)*

48  
49 With regards to negative experiences, one woman reported extreme tiredness after the acupuncture  
50 session, a problem that was addressed by the acupuncturist by adjusting treatment during the next  
51 session, and one man with extreme back pain attributed needling pain to his damaged nerves from a  
52 previous injury. Both of these participants concluded that the treatment went well; however they  
53 also reported, *"It was not for me."* (p4,M, acu; p7,F,acu)

54  
55  
56 *"she'd actually hit at the root for a problem that I have with my pain, because I think at one*  
57 *time she put a needle in me and I kicked her. Without wanting to I involuntarily kicked her.*

10 ACUDEP Qualitative Sub-study V5 19 MAY **SHOWING TRACKED CHANGES** bmjopen-2014-005144,

1  
2  
3 *And she'd obviously hit upon -- I think there was one time when I kicked out and more than a*  
4 *few occasions where she'd twitched a nerve that obviously." (p4,M,acu)*  
5

6 In contrast, within the no-pain group two participants who were worried about the potential pain of  
7 needling prior to starting the treatment later attributed the needling sensations to the healing  
8 process. Three men thought they would have been equally relaxed if they had just rested or gone for  
9 a massage, and two other participants found the sessions too time-consuming.  
10

11 *"A little bit sceptical as to whether the treatments (acupuncture) work anyway. So it was for*  
12 *me like, if I go and get a sport massage, it was like the equivalent of that..." (p13,M,acu)*  
13

#### 14 **Factors that influenced long-term change reported by those receiving acupuncture.**

15 As treatment progressed, many participants reported that their acupuncturist began guiding them to  
16 make changes to their lifestyle in order to engender beneficial long-term outcomes. For most people  
17 with pain, fear of pain and potential injury posed a barrier to engaging in physical activity. The  
18 majority of the pain group reported being encouraged to take up gentle exercise for their overall  
19 health and they also distracted themselves during periods of low mood.  
20

21 *"The things, they seem so small, but they are important. Things like, getting out and going*  
22 *for a walk and getting some fresh air. And just opening your eyes in the mornings and trying*  
23 *to cope with life." (p7,F,acu)*  
24

25 *"He started about exercise, you know, how that can make you feel more up..." (p8,F, acu)*  
26

27 *"I read a lot and try to keep my mind off it. Really." (p9,F,acu)*  
28

29 One man developed his own technique based on how he felt during the acupuncture to help him  
30 manage low moods, whilst another relied on monthly acupuncture treatments alone to stay well;  
31 another considered further treatments but found the cost prohibitive.  
32

33 *"I sort of developed this technique and I don't know, it was like... The way I was feeling*  
34 *during the acupuncture... I sort of clung on to this feeling that, or this technique of gaining*  
35 *that feeling, so I remember on a couple of occasions where I was out and about walking, and*  
36 *thinking about things that would normally would start leading me to start feeling a bit down,*  
37 *but it was like I'd been given this tool in my head and I just sort of -- it just sort of went onto*  
38 *auto-pilot. It was like pulling those feelings away and just sort of throwing them*  
39 *away.... Well, it lasted for a while but it started subsiding." (p1,M,acu)*  
40

41 *"I go for acupuncture now once a month and I find that any more than a month and I can feel*  
42 *myself sort of slipping and feeling really, you know, starting to get worse again. And then I*  
43 *go and I feel much, much better..." (p3,M,acu)*  
44

45 The advice given to the no-pain comparator group was qualitatively different. Acupuncturists  
46 advised on dietary change, the reduction of caffeine and alcohol, and relaxation, which varied with  
47 the presenting symptoms and by gender. Those participants with least rapport also tended to be  
48 those who were less willing to make behavioural changes.  
49

50 *"She also helped with giving me other things that I can do. Suggesting different foods for me*  
51 *to eat to make me feel more energetic.... I was cold all the time and that made me feel more*  
52 *lethargic as well, because all I wanted to do was stay in and go to bed and stay warm. So she*  
53  
54  
55  
56  
57  
58  
59  
60

11 ACUDEP Qualitative Sub-study V5 19 MAY **SHOWING TRACKED CHANGES** [bmjopen-2014-005144](https://bmjopen-2014-005144),

1  
2  
3 *was suggesting that I literally ate warmer foods, and she gave me a list of sort of Chinese*  
4 *medicine sort of foods that they had.” (p20,F,acu)*  
5

6  
7 In general, the process of change evolved in three stages. The therapeutic relationship and active  
8 engagement in recovery acted as mediators of the outcome throughout each stage of the process. In  
9 the short term, acupuncture often relieved physiological symptoms of depression and of comorbid  
10 pain. Longer-term improvement in depression was developed through the participants’ active  
11 engagement in health promoting behaviours, supported by a positive therapeutic relationship.  
12 Several participants with comorbid pain had less physical ability to engage in lifestyle changes and  
13 tended to be the passive recipients of care. These participants often had fewer external resources in  
14 the form of finance and social contact to manage their depression and comorbid symptoms in the  
15 longer-term. Additional quotes are presented in Supplement 6.  
16

### 17 **Processes of change reported by those receiving counselling: positive and negative experiences**

18 Based on their previous experiences of counselling the majority of participants spoke of their low  
19 expectations of counselling. However when engaged with the counselling process within the trial,  
20 most reported being relieved to have someone to talk to in confidence. For both the pain and the  
21 no-pain groups, the process of change followed a common pathway: beginning with the participants’  
22 disclosure of personal information and being listened to.  
23

24  
25 *“I found that process to be very valuable...I found X was very much listening and*  
26 *empathising, but maybe offered interpretation a bit more than the National Health person.”*  
27 *(p37,M,coun)*  
28

29 For most participants this two-way active engagement appeared to nurture a therapeutic  
30 relationship between the participant and counsellor. Four male participants welcomed the  
31 opportunity to speak to a male counsellor, a choice which put them at their ease, and facilitated the  
32 process. Three others found difficulty engaging with their counsellor and attributed this problem to  
33 a personality clash. This presented an early barrier to the process of change.  
34

35  
36 *“A lot of it does depend on who the counsellor is...I’m saying probably same sex works better.*  
37 *They probably have a clearer understanding of the male mind... I found him particularly*  
38 *sympathetic and, you know, very constructive. I think that was...I was very pleased with the*  
39 *way it went...” (p40,M,coun)*  
40

41  
42 *“Every single counselling cliché that you have about, oh it’s parenting issues – she kind of*  
43 *wheeled them all out one after the other and they were already things that I’d thought*  
44 *about, considered and looked at and examined to the nth degree and then thought, no that’s*  
45 *not the problem... It felt like she was reading a script almost – like a guidebook to deal with*  
46 *this kind of disorder...it was almost the complete opposite of what I felt like I needed.”*  
47 *(p28,M,coun)*  
48

49 A second stage of the process of change was often identified as occurring around midway within the  
50 course of treatment. The iterative process of participants’ disclosure continued, with deeper  
51 exploration of their past, which helped to clarify the participant’s understanding of themselves and  
52 their situation.  
53

54  
55 *“At the end of it, it actually for me opened up a can of worms really, and I think it did me*  
56 *more harm than good. A lot of my problems, especially with low self-esteem, come from the*  
57 *way I was brought up by my parents and my father especially. And its stuff that I’d never*  
58 *addressed and it brought it all out, actually. And I actually felt worse at the end of it... I don’t*  
59  
60

12 ACUDEP Qualitative Sub-study V5 19 MAY **SHOWING TRACKED CHANGES** bmjopen-2014-005144,

1  
2  
3 *feel so bad about it now, because I recognise why I am like I am and some of the problems I*  
4 *have, where they come from... Although I say they'd opened up a can of worms, and brought*  
5 *some upsetting experiences back... I think it was good to do that. Because those sort of*  
6 *things had been bottled up for many, many years... it's actually made me address them."*  
7 (p26,M,coun)

9  
10 *"It made me realize that I just held everything in. From being a little girl, everything that had*  
11 *ever bothered me it was never talked about. You know, I'm quite lucky that I've never had*  
12 *any real abuse or anything like that. It's just that I've got memories of being a child and*  
13 *things were said and it hurt. And I just locked it away. And I did that for years."* (p41,F,coun)

14  
15 Several participants realized what factors triggered and perpetuated negative thoughts, some of  
16 which were unfounded. For one man with chronic pain, this meant going through a grieving process  
17 for the loss of his former way of life before setting in place new ways of thinking and coping.

18  
19 *"You know, I think that was the big thing that I got from it, you know – that I could see*  
20 *myself more positively after having the time with him. And understand that some of the*  
21 *negative thoughts that were coming to my mind were not reality, if you like. To let them sail*  
22 *past and focus on the good things that I've done in the past."* (p38,M,coun)

23  
24 *"Everything that defined what I was has now gone. And it took an awful lot of grief, if you*  
25 *like, to come round to the fact that it was worth trying again".* (p25,M,coun)

26  
27  
28 The use of metaphors was particularly useful for de-cluttering unnecessary thoughts about their  
29 past, regaining perspective, setting their problems into context, and focussing on what was  
30 important.

31 *"the discussions were much more free than I'd kind of anticipated they might have been,*  
32 *was using metaphors and analogies and stuff like that, to be able to describe things and*  
33 *move through things. And the pictures were just coming to me in my head, like. I had one*  
34 *which was sort of like a circuit board and it felt like some of the wires were not quite wired*  
35 *up properly and they weren't working and stuff like that. And I can kind of track the*  
36 *metaphors throughout the whole process and it feels like it was much more of a – like it all*  
37 *opened up."* (p38,M,coun)

### 38 39 **Factors that influenced long term change reported by those receiving counselling**

40 The final stage in the process of change was directed towards enabling the participants to maintain  
41 progress independently. Gender differences became apparent in the coping strategies adopted; the  
42 majority of women took up health and well-being strategies. Compared to the women in the pain  
43 group, the women in the no-pain comparator group were able to use a wider range of resources to  
44 cope with, and engage in social activities more easily. One woman recalls being given cognitive  
45 behavioural homework to overcome a particular anxiety.

46  
47  
48 *"She gave me sort of little exercises. I found it very difficult to walk down to a friend of mine.*  
49 *She lives in quite a built up area... People were sitting out in their gardens and I found it very*  
50 *intimidating. I didn't like it. I'd become really sweaty, short of breath walking down through*  
51 *her estate to go and see her... basically she just taught me to get a grip on myself really, by*  
52 *pointing out, you know, that everything was going to be all right... short sharp steps really.*  
53 *And that I'd got the coping mechanisms and I could do it."* (p32,F,coun)

54  
55  
56 Many male participants appear to have continued to practise the cognitive strategies learned within  
57 the earlier sessions, and applied them to their life outside the sessions. However, male participants  
58  
59  
60

13 ACUDEP Qualitative Sub-study V5 19 MAY **SHOWING TRACKED CHANGES** bmjopen-2014-005144,

1  
2  
3 with depression and comorbid pain found greater difficulty sustaining these strategies and returned  
4 to their general practitioner for further help.  
5

6  
7 In summary, the majority of participants had had previous experience of counselling; however, their  
8 initial low expectations of success receded as the course of treatment progressed. A few counsellors  
9 practiced a more directive intervention than humanistic counselling, according to the need of the  
10 participant. The process of change comprised three stages, each mediated by the quality of the  
11 relationship and the participant's active engagement. Additional quotes are presented in  
12 Supplement 7.  
13

#### 14 **Processes of change reported by those receiving usual care**

15 Participants in all three arms received usual care throughout the trial. The process of change within  
16 usual care was less evident. Differences in the appraisal of general practitioner care were apparent:  
17 three older participants with depression and comorbid pain who were allocated to usual care alone  
18 complained of a lack of understanding and continuity of general practitioner and they felt  
19 abandoned without hope. One 89-year-old lady reported:  
20

21 *"I would never go to a doctor again. I am, because I suffer a lot of pain that I needn't have*  
22 *done if he'd been different...if he'd have listened to me instead of just pooh-poohing it off*  
23 *and saying, oh no, it's not that. If he'd have really listened to what I was saying, he could*  
24 *have done more for me...he's ignored what I've told him. Well, in fact he's very often just*  
25 *ignored it all together. Pretended I hadn't said it... You see, at my age you can't really change*  
26 *doctors. There's not many doctors want to take somebody on that's 90 years old, do they?*  
27 *When I'm having a really bad day... you know, and I feel I can't turn even to the doctors, you*  
28 *know, then yeah, I do get depressed."* (p51,F,uc)  
29  
30

31 In contrast, the majority of participants who were pain free pointed to a relationship based on trust  
32 as being a component of their steady improvement over time. For most people, a regular monthly  
33 10-minute consultation was helpful and constructive. A few felt that their general practitioner had  
34 made additional time for them when they were most in need.  
35

36 *"He sees me every month. I have monthly meetings with him just to have a general chat*  
37 *about how things are... I get on fine with him. As I say, I can talk about just about anything*  
38 *with him, so I suppose in a way, he's sort of, if anything he's been maybe a counsellor for me,*  
39 *because, you know, I can sit and talk to him about stuff..."* (p58,M,uc)  
40  
41

42 All participants at some time had been prescribed antidepressant medication. The majority of  
43 participants on long-term antidepressant medication raised concerns about the side effects;  
44 participants in the pain group were particularly concerned about the potential effects of mixing  
45 medication for their other medical problems with their antidepressants. A few acknowledged that  
46 they needed antidepressants to maintain long-term stability.  
47

48 *"Staying on medication, it has transformed my life and made everybody else's life around me*  
49 *better as well. And I wish I'd have done it sooner... It must be four or five years now and yes,*  
50 *it's been life transforming... When I started on my medication and I could realize the*  
51 *difference – the two people I was, almost."* (p7,F,acu)  
52  
53

54 In addition to medication, during the period of the trial general practitioners referred participants to  
55 a range of secondary services: two young women received three sessions with a mental health link  
56 worker, an intervention which had enabled them regain control of their lives; three others had been  
57  
58  
59  
60



14 ACUDEP Qualitative Sub-study V5 19 MAY **SHOWING TRACKED CHANGES** bmjopen-2014-005144,

advised to try online cognitive behavioural therapy which two found to be easily accessible and effective; one man at risk of suicide was referred for urgent psychiatric help.

*"I was referred rapidly to A&E and was assessed by X the psychiatrist. And I was put on to intensive home treatment. Which was invaluable. As a condition of not being sectioned..."*  
(p59,M,uc)

Referrals for younger patients had been beneficial although the waiting times were long and not always found to be acceptable, leaving most patients without adequate support in a time of crisis, and without sufficient money to pay for private care.

*"I go to the doctors and I have to wait a matter of I don't know how many months before I can get, you know, onto the counselling and you know, it's just like the moment's gone, sort of thing... Unfortunately that can cost a lot of money – I'm on benefit. I can't afford it...I don't hold out much hope."* (p50,F,uc)

### **Factors that influenced long term change reported by those receiving usual care: positive and negative experiences**

For those who received help via a referral, the advice followed a familiar pattern: to engage in lifestyle changes, to add structure to the daily routine, and to use distraction to reduce the focus on the symptoms and negative feelings. However, without support the stoicism of 'forcing myself' was a prominent default strategy among most usual care participants.

*"I force myself to do things and then I generally feel better"* (p57,F,uc)

*"It's forcing myself. Well, it's a survival strategy..."*(p59,M,uc)

Overall, the continuity of always seeing the same general practitioner was reported to be important and beneficial. By contrast, some older participants with depression and comorbid pain remained caught in a seemingly hopeless cycle of seeking diagnosis and treatment for a physical complaint and without resources to seek private health care services. Most patients who received acupuncture or counselling were also happy with the attention from their general practitioner, but had welcomed the additional treatment provided within the trial as an adjunct to their usual care. Supplement 8 presents a number of representative quotes.

## **DISCUSSION**

### **Principal findings**

The participants' experiences of depression were a complex interplay of internal and contextual factors. Compared to participants with depression alone, participants with depression and comorbid pain had fewer internal and external resources available to effectively manage their depression in the longer-term. Acupuncture and counselling treatments were individualised interventions that operated from different perspectives. Acupuncturists appeared to work from a more physical perspective to directly relieve the symptoms of depression as they presented and then helped the patient engage in health behaviours that had a positive influence on long-term change. In contrast, counsellors helped guide the patient to identify and confront underlying causes of depression and then find their own way forward. Usual care relied primarily on pharmacological interventions.

Processes of change comprising three stages were identified within acupuncture and counselling, each with specific active components. For both interventions, participants reported that the establishment of a therapeutic relationship and their active engagement helped them develop coping strategies that in turn helped them be more effective in reducing their depression in the



15 ACUDEP Qualitative Sub-study V5 19 MAY **SHOWING TRACKED CHANGES** bmjopen-2014-005144,

1  
2  
3 longer-term. Gender differences were apparent; the majority of women utilised a wide range of  
4 health behaviours, distraction and social contact, whilst men relied predominantly on cognitive  
5 strategies to manage unhelpful negative thought processes.  
6

### 7 **Strengths and Limitations**

8 Qualitative analysis of participants' reports of acupuncture and counselling compared with usual  
9 care provided within a randomised controlled trial is novel. This study was nested within a 12-month  
10 randomised controlled trial of the effectiveness of acupuncture or counselling for depression  
11 compared to usual care. The 52 telephone interviews were obtained from a wide range of  
12 participants in socially diverse settings. The interviews provided rich data on the participants'  
13 experiences of depression and the treatment received in the trial. The thematic analysis was  
14 conducted using a bottom-up process to allow the themes to develop directly from the participants'  
15 own words. We have presented the positive and negative experiences of each form of treatment,  
16 whether treatment was beneficial or not, and we are able to enrich the quantitative results of  
17 effectiveness of the treatments offered with the qualitative data.  
18

19  
20 These qualitative findings are concordant with, and supplement the quantitative data[19] from the  
21 ACUDeP trial which showed that participants with moderate to extreme pain at baseline had worse  
22 outcomes at three months for depression than the no-pain comparator group in all three treatment  
23 arms. Our findings extend the findings of the trial's quantitative data in two ways: firstly, they offer  
24 insight into how pain and disability may erode the internal resources available for the effective  
25 management of depression. Moreover, these limitations compromise the person's security by  
26 reducing ability to generate external resources such as financial income and social contact. Secondly,  
27 based directly on participants' accounts, our findings identify mechanisms within the processes of  
28 change that are specific to acupuncture and counselling that facilitate reduction in the symptoms of  
29 depression.  
30

31  
32 Our study has some limitations. Participants' may have attributed changes directly to treatment  
33 rather than concurrent, coincidental contextual changes. To capture the participants' experience in  
34 the longer-term the interviews were conducted after the participants completed their twelve-  
35 month follow up questionnaire. We accept there is a possibility of recall bias as it has long been  
36 known that there is a significant, stable association between depression and memory  
37 impairment[24]— which may have altered what was recalled and how it was recalled. This lack of  
38 recall is reflected in the brevity of some of the interviews. Although all the research questions in the  
39 topic guide were covered in the interviews, the poor recall of some experiences did not permit a  
40 lengthy exploration. However, our aim was to learn more of the experiences of depression and  
41 treatment in the longer-term and it is likely that the participants recalled the aspects of treatment  
42 that were most salient to them. The lack of face-to face-contact during the telephone interviews  
43 prevented the interviewer gathering non-verbal contextual information such as social cues, body  
44 language, appearance, and setting to supplement the verbal answers of the interviewees. A face-  
45 to-face interview may have resulted in slightly longer interview; nevertheless, a recorded telephone  
46 interview was convenient and might be considered ~~expected~~ to be more acceptable to participants  
47 than a face-to-face interview in terms of time and anonymity.  
48  
49

### 50 **Comparison to other studies**

51 That depression in the presence of pain is associated with a poorer response to treatment for the  
52 depression corresponds with previous studies of depression and pain comorbidity.[2][7] Patients  
53 with depression and comorbid pain tend to exhibit a cognitive bias specific to negative aspects of  
54 health and are more likely to report less favourable outcomes of treatment.[25][26] Many of the  
55 pain group participants had a musculoskeletal problem alongside their depression, and complained  
56  
57  
58  
59  
60

16 ACUDEP Qualitative Sub-study V5 19 MAY **SHOWING TRACKED CHANGES** [bmjopen-2014-005144](https://bmjopen-2014-005144),

1  
2  
3 of fatigue and sleep disturbances. This cluster of symptoms has also been identified in 36% of older  
4 people suffering from osteoarthritis of the hip and knee.[27]

5  
6 The characterisation of depression as a cycle of pain, fatigue and withdrawal that impacts on daily  
7 functioning and social activities is consistent with evidence showing that these factors create an  
8 enduring cycle of depression.[6][28] The cyclical nature of pain problems are known to activate  
9 catastrophic worry and accentuate the symptoms of depression; coping strategies such as relaxation  
10 and distraction techniques are a good way of regulating emotions if the pain is not too intense.[5]  
11 Older people with chronic pain and depression were identified in this study as the least satisfied with  
12 their primary care service, a finding which echoes earlier findings where patients with multiple  
13 physical complaints and depression posed a greater clinical burden[2][7] and were perceived as  
14 'difficult' by general practitioners.[1]

15  
16  
17 With regards to the mechanisms of change, our findings identify three clear stages within  
18 acupuncture and counselling. The establishment of the therapeutic alliance in the early stages is an  
19 essential component from the outset of treatment. This extends the findings from within a  
20 pragmatic trial of acupuncture for back pain[29][30] and supports an earlier model of the process  
21 and mechanisms that contribute to ongoing change in counselling developed from the user  
22 perspective.[31] Historically, the therapeutic alliance has been regarded pejoratively as a placebo  
23 'feel good factor' based on the grounds that most individuals seek positive feedback to reinforce  
24 their own behaviour.[32] However, where this argument focuses on 'visiting' a therapist for advice  
25 and help, it misses the point that the intervention-specific advice and positive reinforcement used in  
26 conjunction with the participant's active engagement in their rehabilitation will activate beneficial  
27 behavioural change.[8] An earlier study found that some participants had difficulty putting self-care  
28 advice into practice, even when they were intellectually committed and suggests that practitioners  
29 may need to follow up more carefully on the advice they have given.[33]

### 31 32 **Implications for practice and future research**

33 Previous work has advocated that the management of depression and comorbid pain should involve  
34 the treatment of both physical and psychological components together, and the treatments should  
35 be customised and directed to addressing comorbidities.[34] Psychiatrists and general practitioners  
36 often feel ill-equipped to adequately manage the complex presentation of symptoms associated  
37 with depression and comorbid pain. A shift in care is required from the current focus on the medical  
38 aspects of physical health to an all-encompassing approach that takes into account the bio-  
39 psychosocial effects of depression and comorbid pain.[35] Future research should investigate the  
40 effectiveness of using a sequential strategy of acupuncture for early relief of symptoms, especially  
41 where there are physical symptoms, followed by counselling to address deeper psychological issues  
42 and develop cognitive coping strategies to break out of the cycle of depression. In the meantime, for  
43 those who have both depression and physical symptoms, our evidence suggests that acupuncture  
44 could be a useful initial referral option.

### 45 46 47 **CONCLUSION**

48 Differences in the way depression is experienced by people with depression and comorbid pain  
49 impact on the participant's engagement with treatment and on the response to treatment for  
50 depression. The processes of acupuncture and counselling had specific identifiable effects that were  
51 beneficial to the majority of participants. The therapeutic relationship and participants' active  
52 engagement in recovery may play distinct roles in driving long-term management of depression and  
53 comorbid pain. This study has implications for policy makers and providers of care for primary care  
54 patients with depression and comorbid pain. Providers of care may wish to consider a short course  
55 of acupuncture to relieve symptoms of depression in patients who present with depression and  
56 comorbid pain, prior to a referral for counselling if needed.

17 ACUDEP Qualitative Sub-study V5 19 MAY **SHOWING TRACKED CHANGES** bmjopen-2014-005144,

1  
2  
3  
4  
5 **Legend Supplement 3.**

6 **Diagram showing the participants' experiences of depression and treatment.**

7 Numbers indicate participants reporting; Bold = participants with chronic pain; <sup>D</sup> = disabled  
8

9 **Acknowledgements**

10 We acknowledge the contribution of the patients, counsellors, acupuncturists and general medical  
11 practitioners; the ACUDEP trial management team; and Anne Burton for transcription services.  
12

13 **Contributors**

14 Ann Hopton (MSc) is a research fellow from a nursing background whose research focuses on the  
15 non-pharmacological management of chronic pain and depression. Ann Hopton conducted the  
16 interviews and analysis, interpreted the data, drafted and revised the article.  
17

18 Dr Janet Eldred is a qualitative researcher and research administrator whose interests are based on  
19 feminist theology and older peoples' lives. Janet Eldred assisted with coding, advised on analysis and  
20 gave final approval for publication.

21 Dr Hugh MacPherson is a practising acupuncturist and senior research fellow specialising in the  
22 effectiveness, cost-effectiveness, mechanisms and safety in the evaluation of complementary  
23 medicine. Hugh MacPherson revised critically important intellectual content and gave final approval  
24 for publication.  
25

26 **Ethics**

27 Ethical approval was obtained from the York NHS Research Ethics Committee (09/H1311/75).  
28  
29

30 **Funding**

31 Funding: This article presents independent research funded by the National Institute for Health  
32 Research (NIHR) under its Programme Grants for Applied Research Programme (RP-PG-0707-10186).  
33 The views expressed are those of the author(s) and not necessarily those of the National Health  
34 Service, the NIHR or the Department of Health. The funders, and the University of York in its role as  
35 sponsor for the study, had no role in study design, data collection and analysis, decision to publish,  
36 or preparation of the manuscript.  
37  
38  
39  
40  
41  
42  
43  
44  
45  
46  
47  
48  
49  
50  
51  
52  
53  
54  
55  
56  
57  
58  
59  
60

18 ACUDEP Qualitative Sub-study V5 19 MAY **SHOWING TRACKED CHANGES** [bmjopen-2014-005144](https://doi.org/10.1136/bmjopen-2014-005144),

## REFERENCES

- 1 Katona C, Peveler R, Dowrick C, *et al*. Pain symptoms in depression: definition and clinical significance. *Clinical Medicine* 2005;**5**:390–5. doi:10.7861/clinmedicine.5-4-390
- 2 Arnow BA. Comorbid Depression, Chronic Pain, and Disability in Primary Care. *Psychosomatic Medicine* 2006;**68**:262–8. doi:10.1097/01.psy.0000204851.15499.fc
- 3 Bair MJ RR. Depression and pain comorbidity: A literature review. *ArchInternMed* 2003;**163**:2433–45.
- 4 Kroenke K, Wu J, Bair MJ, *et al*. Reciprocal Relationship Between Pain and Depression: A 12-Month Longitudinal Analysis in Primary Care. *The Journal of Pain* 2011;**12**:964–73. doi:10.1016/j.jpain.2011.03.003
- 5 Linton SJ, Nicholas MK, MacDonald S, *et al*. The role of depression and catastrophizing in musculoskeletal pain. *European Journal of Pain* 2011;**15**:416–22.
- 6 Tylee A, Gandhi P. The Importance of Somatic Symptoms in Depression in Primary Care. *Prim Care Companion J Clin Psychiatry* 2005;**7**:167–76.
- 7 Kroenke K, Shen J, Oxman TE, *et al*. Impact of pain on the outcomes of depression treatment: Results from the RESPECT trial. *Pain* 2008;**134**:209–15. doi:10.1016/j.pain.2007.09.021
- 8 Bair MJ, Matthias MS, Nyland KA, *et al*. Barriers and Facilitators to Chronic Pain Self-Management: A Qualitative Study of Primary Care Patients with Comorbid Musculoskeletal Pain and Depression. *Pain Medicine* 2009;**10**:1280–90.
- 9 Gensichen J, Guethlin C, Sarmand N, *et al*. Patients' perspectives on depression case management in general practice – A qualitative study. *Patient Education and Counseling* 2012;**86**:114–9. doi:10.1016/j.pec.2011.02.020
- 10 Kadam UT, Croft P, McLeod J, *et al*. A qualitative study of patients' views on anxiety and depression. *Br J Gen Pract* 2001;**51**:375–80.
- 11 Vickers AJ, Cronin AM, Maschino AC, *et al*. Acupuncture for Chronic Pain: Individual Patient Data Meta-analysis. *ArchInternMed* 2012;**172**:1–10.
- 12 Lam M, Curry P. Effectiveness of Acupuncture for Nonspecific Chronic Low Back Pain: A Systematic Review and Meta-analysis. *Spine* 2013;**38**:2124–38. doi:10.1097/01.brs.0000435025.65564.b7
- 13 Hopton AK, Curnoe S, Kanaan M, *et al*. Acupuncture in practice: mapping the providers, the patients and the settings in a national cross-sectional survey. *BMJ Open* 2012;**2**.<http://bmjopen.bmj.com/content/2/1/e000456.abstract>
- 14 Smith CA, Hay PP. Acupuncture for depression. *CochraneDatabaseSystRev* 2005:CD004046.
- 15 Van Schaik DJF, Klijn AFJ, Van Hout HPJ, *et al*. Patients' preferences in the treatment of depressive disorder in primary care. *General Hospital Psychiatry* 2004;**26**:184–9. doi:10.1016/j.genhospsych.2003.12.001
- 16 Bower P, Knowles S, Coventry PA, *et al*. Counselling for mental health and psychosocial problems in primary care. *CochraneDatabaseSystRev* 2011:CD001025.

- 1  
2  
3  
4  
5  
6  
7  
8  
9  
10  
11  
12  
13  
14  
15  
16  
17  
18  
19  
20  
21  
22  
23  
24  
25  
26  
27  
28  
29  
30  
31  
32  
33  
34  
35  
36  
37  
38  
39  
40  
41  
42  
43  
44  
45  
46  
47  
48  
49  
50  
51  
52  
53  
54  
55  
56  
57  
58  
59  
60
- 19 ACUDEP Qualitative Sub-study V5 19 MAY **SHOWING TRACKED CHANGES** [bmjopen-2014-005144](https://doi.org/10.1136/bmjopen-2014-005144),
- 17 Barnes D, Hall J, Evans R. Survey of the Current Provision of Psychological Therapy Services in Primary Care in the UK. Artemis Trust 2008.  
[http://www.bacp.co.uk/admin/structure/files/pdf/2440\\_pl\\_438\\_artemis\\_report\\_web\\_small.pdf](http://www.bacp.co.uk/admin/structure/files/pdf/2440_pl_438_artemis_report_web_small.pdf) (accessed 10 Feb2014).
- 18 MacPherson H, Richmond S, Bland M, *et al.* Acupuncture and Counselling for Depression in Primary Care: A Randomised Controlled Trial. *PLoS Medicine* 2013;**10**:e1001518.  
doi:10.1371/journal.pmed.1001518
- 19 Hopton A, MacPherson H, Keding A, *et al.* Acupuncture, counselling or usual care for depression and comorbid pain: secondary analysis of a randomised controlled trial. *BMJ Open* 2014;**4**:e004964–e004964. doi:10.1136/bmjopen-2014-004964
- 20 Charmaz K. *Constructing Grounded Theory: A practical guide through qualitative analysis*. London: : Sage 2006.
- 21 MacPherson H, Schroer S. Acupuncture as a complex intervention for depression: a consensus method to develop a standardised treatment protocol for a randomised controlled trial. *Complement TherMed* 2007;**15**:92–100.
- 22 MacPherson H, Richmond S, Bland MJ, *et al.* Acupuncture, Counseling, and Usual care for Depression (ACUDep): study protocol for a randomized controlled trial. *Trials* 2012;**13**:209.
- 23 Braun V, Clarke V. Using thematic analysis in psychology. *Qualitative Research in Psychology* 2006;**3**:77–101.
- 24 Burt DB, Zembar MJ, Niederehe G. Depression and memory impairment: A meta-analysis of the association, its pattern, and specificity. *Psychological Bulletin* 1995;**117**:285–305.  
doi:10.1037/0033-2909.117.2.285
- 25 Pincus T, Santos R, Morley S. Depressed cognitions in chronic pain patients are focused on health: Evidence from a sentence completion task. *Pain* 2007;**130**:84–92.  
doi:10.1016/j.pain.2006.10.031
- 26 Rusu AC, Pincus T, Morley S. Depressed pain patients differ from other depressed groups: Examination of cognitive content in a sentence completion task. *PAIN* 2012;**153**:1898–904.  
doi:10.1016/j.pain.2012.05.034
- 27 Murphy SL, Lyden AK, Phillips K, *et al.* Subgroups of older adults with osteoarthritis based upon differing comorbid symptom presentations and potential underlying pain mechanisms. *Arthritis Research & Therapy* 2011;**13**:R135. doi:10.1186/ar3449
- 28 Alderson SL, Foy R, Glidewell L, *et al.* How patients understand depression associated with chronic physical disease – a systematic review. *BMC Family Practice* 2012;**13**:41.  
doi:10.1186/1471-2296-13-41
- 29 MacPherson H, Thomas K. Self-help advice as a process integral to traditional acupuncture care: implications for trial design. *Complement TherMed* 2008;**16**:101–6.
- 30 Hopton A, Thomas K, MacPherson H. The Acceptability of Acupuncture for Low Back Pain: A Qualitative Study of Patient’s Experiences Nested within a Randomised Controlled Trial. *PLoS ONE* 2013;**8**:e56806. doi:10.1371/journal.pone.0056806

20 ACUDEP Qualitative Sub-study V5 19 MAY **SHOWING TRACKED CHANGES** bmjopen-2014-005144,

- 1  
2  
3  
4  
5  
6  
7  
8  
9  
10  
11  
12  
13  
14  
15  
16  
17  
18  
19  
20  
21  
22  
23  
24  
25  
26  
27  
28  
29  
30  
31  
32  
33  
34  
35  
36  
37  
38  
39  
40  
41  
42  
43  
44  
45  
46  
47  
48  
49  
50  
51  
52  
53  
54  
55  
56  
57  
58  
59  
60
- 31 Perren S, Godfrey M, Rowland N. The long-term effects of counselling: The process and mechanisms that contribute to ongoing change from a user perspective. *Counselling and Psychotherapy Research* 2009;**9**:241–9. doi:10.1080/14733140903150745
- 32 Wall M, Wheeler S. Benefits of the placebo effect in the therapeutic relationship. *Complementary Therapies in Nursing and Midwifery* 1996;**2**:160–3. doi:10.1016/S1353-6117(96)80050-3
- 33 Evans M, Paterson C, Wye L, *et al.* Lifestyle and Self-Care Advice Within Traditional Acupuncture Consultations: A Qualitative Observational Study Nested in a Co-Operative Inquiry. *The Journal of Alternative and Complementary Medicine* 2011;**17**:519–29. doi:10.1089/acm.2010.0749
- 34 Lavigne GJ, Nashed A, Manzini C, *et al.* Does Sleep Differ Among Patients with Common Musculoskeletal Pain Disorders? *Current Rheumatology Reports* 2011;**13**:535–42. doi:10.1007/s11926-011-0209-3
- 35 National Collaborating Centre for Mental Health. CG91: Depression in adults with a chronic physical health problem: Treatment and management. British Psychological Society & the Royal College of Physicians 2010. <http://www.nice.org.uk/CG91>
